# Supplementary material for: Steric effects determine the mechanisms of reactions between bis(N-heterocyclic carbene)-nickel(0) complexes and aryl halides
Source: Royal Society of Chemistry journal article supplement (doi:10.1039/c8cc06379f), 2018-01-01
Supplement: c8cc06379f1.pdf [file c8cc06379f1.pdf]

SUPPORTING INFORMATION FOR

***Steric effects determine the mechanisms of reactions between  
bis(N-heterocyclic carbene)-nickel(0) complexes and aryl halides***

David J. Nelson<sup>a\*</sup> and Feliu Maseras<sup>b,c</sup>

a) WestCHEM Department of Pure & Applied Chemistry, University of Strathclyde, 295 Cathedral Street, Glasgow, G1 1XL, UK. david.nelson@strath.ac.uk

b) Institute of Chemical Research of Catalonia (ICIQ), Barcelona Institute of Technology (BIST), Avda. Països Catalans, Tarragona, Spain. fmaseras@icmq.es

c) Departament de Química, Universitat Autònoma de Barcelona, 08193 Bellaterra, Spain

**CONTENTS**

|                                                                                   |     |      |      |      |      |      |      |      |      |
|-----------------------------------------------------------------------------------|-----|------|------|------|------|------|------|------|------|
| Computational details                                                             | ... | ...  | ...  | ...  | .... | .... | .... | .... | S2   |
| Formation of [Ni(NHC) <sub>2</sub> ] complexes from [Ni(COD) <sub>2</sub> ]       | ... | ...  | ...  | ...  | ...  | ...  | ...  | ...  | S2   |
| Relative enthalpies of all structures                                             | ... | .... | ...  | ...  | ...  | ...  | ...  | ...  | S3   |
| Electronic energies for the distortion of [Ni(IMes) <sub>2</sub> ] ( <b>B-1</b> ) | ... | ...  | ...  | ...  | ...  | ...  | ...  | ...  | S4   |
| Free energy profiles for reactions of [Ni(IXy) <sub>2</sub> ] ( <b>C-1</b> )      | ... | ...  | ...  | ...  | ...  | ...  | ...  | ...  | S4   |
| Cartesian coordinates and potential energies for all structures                   | ... | .... | ...  | ...  | .... | ...  | ...  | ...  | S5   |
| References                                                                        | ... | .... | .... | .... | .... | .... | .... | .... | S176 |

## COMPUTATIONAL DETAILS

- All calculations in this manuscript were carried out using Gaussian 09 (Revision D. 01).<sup>1</sup>
- The nature of all stationary points was verified using frequency calculations.
- The B3LYP density functional<sup>2-4</sup> was used with Grimme's D3 dispersion corrections.<sup>5</sup> This is the same functional that was used during our previous study, and was shown to be appropriate to model the processes that are under investigation.<sup>6</sup> The inclusion of dispersion corrections renders this level of theory appropriate for the study of transition metal complexes.<sup>7</sup>
- The 6-31G(d) basis set was used for H/C/N/Cl atoms during optimisation and frequency calculations. The 6-311+G(d,p) basis set was used for H/C/N/Cl when refining the energies using single point calculations.
- Throughout this work, LANL2TZ(f) was used for Ni, and LANL2DZ(dp) was used for Br and I.<sup>8-10</sup>
- All calculations were carried out in THF solvent using the SMD model.<sup>11</sup>
- Energies for open shell singlet structures were corrected using Yamaguchi's equation (see Supporting Information) to account for spin contamination when  $\langle S^2 \rangle_{\text{OSS}} \neq 0$ .<sup>12-16</sup>

$$E_{\text{singlet}} = (2E_{\text{OSS}} - E_{\text{triplet}} \cdot \langle S^2 \rangle_{\text{OSS}}) / (2 - \langle S^2 \rangle_{\text{OSS}})$$

## FORMATION OF [Ni(NHC)<sub>2</sub>] FROM [Ni(COD)<sub>2</sub>]

**Table S1.** Formation of [Ni(ITMe)<sub>2</sub>] (**A-1**), [Ni(IMes)<sub>2</sub>] (**B-1**), [Ni(IXy)<sub>2</sub>] (**C-1**), and [Ni(IPhen)<sub>2</sub>] (**D-1**) from [Ni(COD)<sub>2</sub>]. Energies are in kcal mol<sup>-1</sup> in THF solution, relative to [Ni(NHC)<sub>2</sub>].

| NHC   | [Ni(COD) <sub>2</sub> ] |                  | [Ni(COD)(NHC)]   |                  | [Ni(NHC) <sub>2</sub> ] |                  |                  |
|-------|-------------------------|------------------|------------------|------------------|-------------------------|------------------|------------------|
|       | H <sub>rel</sub>        | G <sub>rel</sub> | H <sub>rel</sub> | G <sub>rel</sub> | Complex                 | H <sub>rel</sub> | G <sub>rel</sub> |
| ITMe  | 0.2                     | 5.1              | 17.8             | 14.6             | <b>A-1</b>              | 0.0              | 0.0              |
| IMes  | 17.1                    | 15.7             | 8.4              | 10.1             | <b>B-1</b>              | 0.0              | 0.0              |
| IXy   | 15.8                    | 15.8             | 16.5             | 13.8             | <b>C-1</b>              | 0.0              | 0.0              |
| IPhen | 9.7                     | 11.0             | 12.1             | 11.2             | <b>D-1</b>              | 0.0              | 0.0              |

## ENTHALPIES FOR ALL STRUCTURES

**Table S2.** Enthalpies of the species considered in this work. Enthalpies are in kcal mol<sup>-1</sup> in THF solution, relative to [Ni(NHC)<sub>2</sub>].

| Structure   | H <sub>rel</sub> (kcal mol <sup>-1</sup> ) |                |                |                |
|-------------|--------------------------------------------|----------------|----------------|----------------|
|             | ITMe (A)                                   | IMes (B)       | IXy (C)        | IPhen (D)      |
| X-1         | 0.0                                        | 0.0            | 0.0            | 0.0            |
| X-2-Cl      | -16.8                                      | 7.3            | 7.1            | -11.1          |
| X-2-Br      | -17.8                                      | 7.4            | - <sup>a</sup> | - <sup>a</sup> |
| X-2-I       | - <sup>b</sup>                             | 5.7            | - <sup>a</sup> | - <sup>a</sup> |
| TS-X-2-3-Cl | -16.6                                      | 9.9            | 9.7            | -11.4          |
| TS-X-2-3-Br | - <sup>b</sup>                             | 7.9            | - <sup>a</sup> | - <sup>a</sup> |
| TS-X-2-3-I  | - <sup>b</sup>                             | - <sup>b</sup> | - <sup>a</sup> | - <sup>a</sup> |
| X-3-Cl      | -60.5                                      | -29.5          | -28.7          | -50.4          |
| X-3-Br      | -59.5                                      | -28.5          | - <sup>a</sup> | - <sup>a</sup> |
| X-3-I       | -63.3                                      | -31.8          | - <sup>a</sup> | - <sup>a</sup> |
| X-4-Cl      | -64.9                                      | -54.5          | -53.6          | -59.6          |
| X-4-Br      | -64.4                                      | -51.2          | - <sup>a</sup> | - <sup>a</sup> |
| X-4-I       | -68.8                                      | -51.9          | - <sup>a</sup> | - <sup>a</sup> |
| X-5-Cl      | -2.3                                       | -3.4           | -3.8           | 0.3            |
| X-5-Br      | -3.1                                       | -4.5           | - <sup>a</sup> | - <sup>a</sup> |
| X-5-I       | -9.7                                       | -10.9          | - <sup>a</sup> | - <sup>a</sup> |
| TS-X-5-6-Cl | 0.7                                        | 2.8            | 2.8            | 7.1            |
| TS-X-5-6-Br | -1.5                                       | -5.4           | - <sup>a</sup> | - <sup>a</sup> |
| TS-X-5-6-I  | -10.6                                      | 1.0            | - <sup>a</sup> | - <sup>a</sup> |
| X-6-Cl      | -8.9                                       | -6.7           | -5.4           | -3.3           |
| X-6-Br      | -7.9                                       | -5.7           | - <sup>a</sup> | - <sup>a</sup> |
| X-6-I       | -14.0                                      | -11.5          | - <sup>a</sup> | - <sup>a</sup> |
| X-7-Cl      | -29.1                                      | -26.9          | -25.7          | -23.5          |
| X-7-Br      | -28.2                                      | -25.9          | - <sup>a</sup> | - <sup>a</sup> |
| X-7-I       | -34.3                                      | -31.1          | - <sup>a</sup> | - <sup>a</sup> |
| X-2'        | - <sup>a</sup>                             | 26.2           | - <sup>a</sup> | - <sup>a</sup> |
| TS-X-2'-3'  | - <sup>a</sup>                             | 31.4           | - <sup>a</sup> | - <sup>a</sup> |
| X-3'        | - <sup>a</sup>                             | -16.1          | - <sup>a</sup> | - <sup>a</sup> |

a) Not studied. b) Could not be located.

## ELECTRONIC ENERGIES FOR THE DISTORTION OF [Ni(IMes)<sub>2</sub>] (B-1)

**Table S3.** Electronic energies of the [Ni(IMes)<sub>2</sub>] fragment, relative to [Ni(IMes)<sub>2</sub>] (B-1).

| Ni(IMes) <sub>2</sub> Fragment From                    | Electronic Energy (kcal mol <sup>-1</sup> ) |
|--------------------------------------------------------|---------------------------------------------|
| [Ni(IMes) <sub>2</sub> ] (B-1)                         | 0.0                                         |
| [Ni(IMes) <sub>2</sub> (η <sup>2</sup> -PhCl) (B-2-Cl) | 38.0                                        |
| [Ni(IMes) <sub>2</sub> (η <sup>2</sup> -PhBr) (B-2-Br) | 39.4                                        |
| [Ni(IMes) <sub>2</sub> (η <sup>2</sup> -PhI) (B-2-I)   | 40.1                                        |

## FREE ENERGY PROFILES FOR THE REACTIONS OF [Ni(IXy)<sub>2</sub>] (C-1)

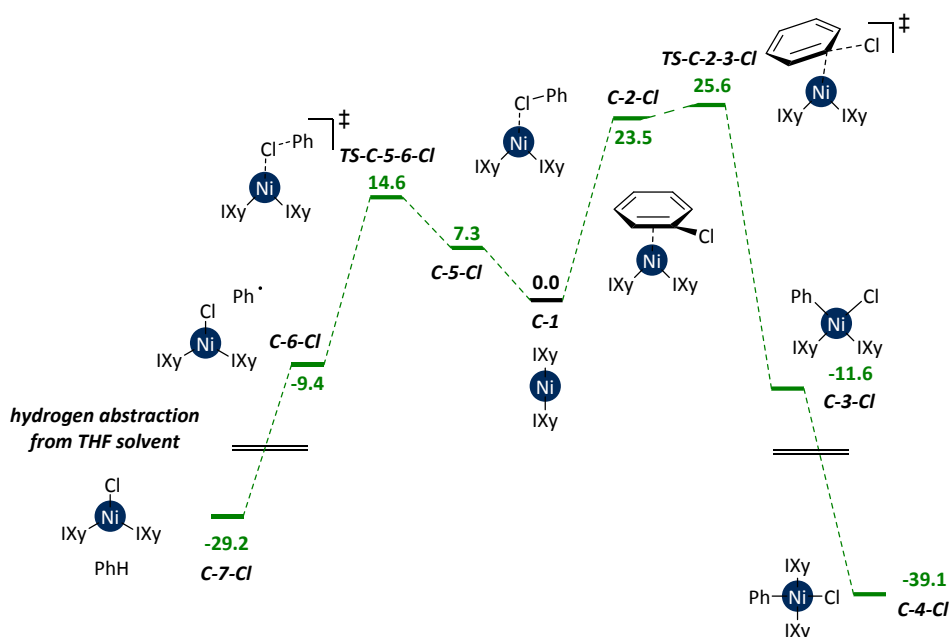

**Figure S1.** Free energy profiles for the reactions of [Ni(IXy)<sub>2</sub>] (C-1) with PhCl. Energies are free energies in kcal mol<sup>-1</sup> in THF solution, relative to C-1.

**CARTESIAN COORDINATES AND POTENTIAL ENERGIES FOR ALL STRUCTURES**

large\_basis\_TS-C-2-3-Cl\_NiIXy2\_OA\_PhCl\_bb

Energy (POTENTIAL) = -2552.99075166 Eh

|    | Atom | X       | Y       | Z       |
|----|------|---------|---------|---------|
| 1  | C    | 1.6848  | 2.2360  | 0.0365  |
| 2  | C    | 2.6691  | 2.5005  | -0.8429 |
| 3  | C    | 2.3783  | 0.2065  | -0.8238 |
| 4  | N    | 1.5004  | 0.8528  | 0.0338  |
| 5  | N    | 3.0829  | 1.2714  | -1.3564 |
| 6  | Ni   | 2.6684  | -1.6711 | -1.3305 |
| 7  | C    | 4.3223  | -2.9146 | -1.2155 |
| 8  | N    | 5.0569  | -3.2226 | -0.0907 |
| 9  | N    | 4.7695  | -3.8695 | -2.1118 |
| 10 | C    | 5.9002  | -4.3155 | -0.2806 |
| 11 | C    | 5.7201  | -4.7209 | -1.5556 |
| 12 | H    | 6.5472  | -4.6785 | 0.5029  |
| 13 | H    | 6.1719  | -5.5181 | -2.1252 |
| 14 | H    | 1.0898  | 2.8844  | 0.6599  |
| 15 | H    | 3.1154  | 3.4295  | -1.1606 |
| 16 | C    | 4.4764  | -3.9539 | -3.5166 |
| 17 | C    | 3.7868  | -5.0744 | -4.0091 |
| 18 | C    | 5.0001  | -2.9609 | -4.3618 |
| 19 | C    | 3.5690  | -5.1502 | -5.3919 |
| 20 | C    | 4.7441  | -3.0659 | -5.7334 |
| 21 | C    | 4.0292  | -4.1493 | -6.2462 |
| 22 | H    | 3.0244  | -6.0012 | -5.7931 |
| 23 | H    | 5.1302  | -2.3015 | -6.4028 |
| 24 | C    | 5.2075  | -2.4247 | 1.0976  |
| 25 | C    | 6.1143  | -1.3513 | 1.0446  |
| 26 | C    | 4.5915  | -2.8347 | 2.2886  |
| 27 | C    | 6.3351  | -0.6223 | 2.2188  |
| 28 | C    | 4.8618  | -2.0950 | 3.4478  |
| 29 | C    | 5.7106  | -0.9897 | 3.4120  |
| 30 | H    | 7.0232  | 0.2188  | 2.1988  |
| 31 | H    | 4.3909  | -2.3890 | 4.3821  |
| 32 | C    | 0.4041  | 0.3103  | 0.7931  |
| 33 | C    | -0.9049 | 0.6842  | 0.4299  |
| 34 | C    | 0.6652  | -0.4732 | 1.9257  |
| 35 | C    | -1.9640 | 0.2112  | 1.2160  |
| 36 | C    | -0.4203 | -0.9190 | 2.6869  |
| 37 | C    | -1.7270 | -0.5862 | 2.3345  |
| 38 | H    | -2.9821 | 0.4752  | 0.9411  |
| 39 | H    | -0.2312 | -1.5348 | 3.5625  |
| 40 | C    | 4.0852  | 1.2529  | -2.3871 |
| 41 | C    | 5.3910  | 1.6534  | -2.0502 |
| 42 | C    | 3.6944  | 1.0125  | -3.7180 |
| 43 | C    | 6.3308  | 1.7665  | -3.0840 |
| 44 | C    | 4.6608  | 1.1565  | -4.7198 |
| 45 | C    | 5.9684  | 1.5290  | -4.4086 |
| 46 | H    | 7.3485  | 2.0617  | -2.8412 |
| 47 | H    | 4.3784  | 0.9729  | -5.7532 |
| 48 | C    | 5.8609  | -1.8559 | -3.8089 |
| 49 | H    | 5.2793  | -1.1683 | -3.1910 |

|    |    |         |         |         |
|----|----|---------|---------|---------|
| 50 | H  | 6.6582  | -2.2639 | -3.1760 |
| 51 | H  | 6.3223  | -1.2828 | -4.6152 |
| 52 | C  | 3.2978  | -6.1786 | -3.1017 |
| 53 | H  | 4.0672  | -6.9505 | -2.9682 |
| 54 | H  | 3.0356  | -5.8131 | -2.1045 |
| 55 | H  | 2.4158  | -6.6658 | -3.5295 |
| 56 | C  | 3.6575  | -4.0164 | 2.3148  |
| 57 | H  | 4.1404  | -4.9222 | 1.9290  |
| 58 | H  | 3.3164  | -4.2210 | 3.3343  |
| 59 | H  | 2.7777  | -3.8318 | 1.6877  |
| 60 | C  | 6.8713  | -1.0481 | -0.2234 |
| 61 | H  | 7.4325  | -1.9284 | -0.5607 |
| 62 | H  | 6.1977  | -0.7680 | -1.0374 |
| 63 | H  | 7.5832  | -0.2340 | -0.0681 |
| 64 | C  | 5.7678  | 2.0124  | -0.6326 |
| 65 | H  | 5.4282  | 3.0247  | -0.3796 |
| 66 | H  | 5.3205  | 1.3320  | 0.0974  |
| 67 | H  | 6.8537  | 1.9932  | -0.5057 |
| 68 | C  | 2.2815  | 0.6220  | -4.0571 |
| 69 | H  | 1.5554  | 1.3157  | -3.6169 |
| 70 | H  | 2.1304  | 0.6044  | -5.1406 |
| 71 | H  | 2.0522  | -0.3705 | -3.6616 |
| 72 | C  | -1.1956 | 1.5695  | -0.7617 |
| 73 | H  | -0.4877 | 1.4049  | -1.5789 |
| 74 | H  | -2.2045 | 1.3768  | -1.1411 |
| 75 | H  | -1.1441 | 2.6324  | -0.4933 |
| 76 | C  | 2.0738  | -0.8213 | 2.3029  |
| 77 | H  | 2.6881  | 0.0751  | 2.4535  |
| 78 | H  | 2.0993  | -1.4134 | 3.2210  |
| 79 | H  | 2.5466  | -1.3981 | 1.5054  |
| 80 | C  | 0.9066  | -2.2221 | -1.7824 |
| 81 | C  | -0.2381 | -1.4415 | -2.1133 |
| 82 | C  | 1.4555  | -3.0738 | -2.7821 |
| 83 | C  | -0.6387 | -1.3303 | -3.4314 |
| 84 | H  | -0.7667 | -0.9274 | -1.3248 |
| 85 | C  | 1.0348  | -2.9312 | -4.1218 |
| 86 | H  | 2.0608  | -3.9176 | -2.4946 |
| 87 | C  | 0.0153  | -2.0517 | -4.4582 |
| 88 | H  | -1.4741 | -0.6771 | -3.6769 |
| 89 | H  | 1.4894  | -3.5620 | -4.8802 |
| 90 | H  | -0.3172 | -1.9586 | -5.4888 |
| 91 | Cl | 0.6722  | -3.2541 | -0.0011 |
| 92 | H  | -2.5607 | -0.9448 | 2.9327  |
| 93 | H  | 6.7065  | 1.6318  | -5.1999 |
| 94 | H  | 3.8414  | -4.2194 | -7.3144 |
| 95 | H  | 5.9008  | -0.4233 | 4.3201  |

large\_basis\_TS-B-5-6-Cl\_NiMes2\_ossts\_PhCl\_t\_bb  
Energy (POTENTIAL) = -2710.30413986 Eh

|    | Atom | X       | Y       | Z       |
|----|------|---------|---------|---------|
| 1  | C    | -0.5099 | 1.0261  | 0.0647  |
| 2  | C    | 0.5237  | 1.8105  | -0.3262 |
| 3  | C    | 1.2463  | -0.3637 | -0.4250 |
| 4  | N    | -0.0564 | -0.2896 | 0.0016  |
| 5  | N    | 1.5808  | 0.9512  | -0.6206 |
| 6  | Ni   | 2.3399  | -1.8916 | -0.6853 |
| 7  | C    | 3.4367  | -3.3434 | -1.2191 |
| 8  | N    | 4.7224  | -3.6484 | -0.8444 |
| 9  | N    | 3.1149  | -4.3657 | -2.0730 |
| 10 | C    | 5.1757  | -4.8199 | -1.4471 |
| 11 | C    | 4.1612  | -5.2745 | -2.2219 |
| 12 | H    | 6.1670  | -5.2070 | -1.2695 |
| 13 | H    | 4.0780  | -6.1433 | -2.8564 |
| 14 | H    | -1.5144 | 1.2699  | 0.3743  |
| 15 | H    | 0.6126  | 2.8816  | -0.4234 |
| 16 | C    | 1.8393  | -4.5201 | -2.7145 |
| 17 | C    | 0.7954  | -5.1374 | -2.0069 |
| 18 | C    | 1.6904  | -4.0878 | -4.0412 |
| 19 | C    | -0.4095 | -5.3545 | -2.6817 |
| 20 | C    | 0.4597  | -4.3116 | -4.6689 |
| 21 | C    | -0.5960 | -4.9509 | -4.0089 |
| 22 | H    | -1.2251 | -5.8423 | -2.1534 |
| 23 | H    | 0.3252  | -3.9802 | -5.6963 |
| 24 | C    | 5.5124  | -2.8580 | 0.0578  |
| 25 | C    | 6.0318  | -1.6326 | -0.3889 |
| 26 | C    | 5.7604  | -3.3455 | 1.3508  |
| 27 | C    | 6.7943  | -0.8782 | 0.5091  |
| 28 | C    | 6.5296  | -2.5547 | 2.2120  |
| 29 | C    | 7.0446  | -1.3156 | 1.8145  |
| 30 | H    | 7.2000  | 0.0744  | 0.1779  |
| 31 | H    | 6.7238  | -2.9150 | 3.2199  |
| 32 | C    | -0.8612 | -1.4297 | 0.3396  |
| 33 | C    | -1.3564 | -2.2413 | -0.6926 |
| 34 | C    | -1.1433 | -1.6866 | 1.6914  |
| 35 | C    | -2.1371 | -3.3474 | -0.3383 |
| 36 | C    | -1.9287 | -2.8037 | 1.9950  |
| 37 | C    | -2.4254 | -3.6504 | 0.9966  |
| 38 | H    | -2.5257 | -3.9860 | -1.1275 |
| 39 | H    | -2.1515 | -3.0202 | 3.0377  |
| 40 | C    | 2.8808  | 1.4055  | -1.0295 |
| 41 | C    | 3.8797  | 1.5565  | -0.0558 |
| 42 | C    | 3.0986  | 1.7199  | -2.3804 |
| 43 | C    | 5.1163  | 2.0676  | -0.4639 |
| 44 | C    | 4.3552  | 2.2154  | -2.7428 |
| 45 | C    | 5.3719  | 2.4033  | -1.7979 |
| 46 | H    | 5.8996  | 2.1972  | 0.2788  |
| 47 | H    | 4.5434  | 2.4605  | -3.7860 |
| 48 | C    | 2.8163  | -3.3777 | -4.7511 |
| 49 | H    | 3.0777  | -2.4482 | -4.2293 |

|     |   |         |         |         |
|-----|---|---------|---------|---------|
| 50  | H | 3.7268  | -3.9879 | -4.7853 |
| 51  | H | 2.5359  | -3.1260 | -5.7786 |
| 52  | C | 0.9598  | -5.5021 | -0.5547 |
| 53  | H | 1.8604  | -6.1045 | -0.3844 |
| 54  | H | 1.0665  | -4.5921 | 0.0485  |
| 55  | H | 0.0944  | -6.0627 | -0.1888 |
| 56  | C | -1.9304 | -5.1498 | -4.6869 |
| 57  | H | -2.4088 | -6.0821 | -4.3662 |
| 58  | H | -2.6194 | -4.3306 | -4.4375 |
| 59  | H | -1.8320 | -5.1719 | -5.7777 |
| 60  | C | 5.2075  | -4.6725 | 1.8076  |
| 61  | H | 5.7250  | -5.5132 | 1.3279  |
| 62  | H | 5.3169  | -4.7869 | 2.8900  |
| 63  | H | 4.1446  | -4.7550 | 1.5625  |
| 64  | C | 5.7571  | -1.1288 | -1.7822 |
| 65  | H | 5.8971  | -1.9165 | -2.5317 |
| 66  | H | 4.7177  | -0.7883 | -1.8626 |
| 67  | H | 6.4125  | -0.2904 | -2.0315 |
| 68  | C | 7.8253  | -0.4539 | 2.7784  |
| 69  | H | 7.1715  | 0.2879  | 3.2573  |
| 70  | H | 8.2801  | -1.0510 | 3.5763  |
| 71  | H | 8.6225  | 0.0998  | 2.2688  |
| 72  | C | 3.6308  | 1.1414  | 1.3710  |
| 73  | H | 2.7454  | 1.6378  | 1.7874  |
| 74  | H | 3.4452  | 0.0618  | 1.4240  |
| 75  | H | 4.4893  | 1.3788  | 2.0061  |
| 76  | C | 2.0139  | 1.5005  | -3.4056 |
| 77  | H | 1.1163  | 2.0896  | -3.1811 |
| 78  | H | 2.3588  | 1.7756  | -4.4070 |
| 79  | H | 1.7055  | 0.4477  | -3.4250 |
| 80  | C | 6.7335  | 2.9007  | -2.2207 |
| 81  | H | 6.6615  | 3.6509  | -3.0166 |
| 82  | H | 7.2786  | 3.3448  | -1.3807 |
| 83  | H | 7.3471  | 2.0761  | -2.6097 |
| 84  | C | -1.0339 | -1.9541 | -2.1361 |
| 85  | H | -1.1239 | -0.8866 | -2.3672 |
| 86  | H | 0.0004  | -2.2466 | -2.3562 |
| 87  | H | -1.6963 | -2.5114 | -2.8035 |
| 88  | C | -0.6070 | -0.7966 | 2.7845  |
| 89  | H | -1.0963 | 0.1857  | 2.7836  |
| 90  | H | -0.7662 | -1.2493 | 3.7675  |
| 91  | H | 0.4669  | -0.6313 | 2.6567  |
| 92  | C | -3.2268 | -4.8795 | 1.3537  |
| 93  | H | -2.5689 | -5.7487 | 1.4905  |
| 94  | H | -3.7802 | -4.7423 | 2.2894  |
| 95  | H | -3.9440 | -5.1357 | 0.5658  |
| 96  | C | 2.2979  | -3.1134 | 3.7016  |
| 97  | C | 1.1611  | -3.7110 | 4.2313  |
| 98  | C | 3.4232  | -2.8626 | 4.4768  |
| 99  | C | 1.1519  | -4.0709 | 5.5861  |
| 100 | H | 0.2918  | -3.8940 | 3.6020  |
| 101 | C | 3.4105  | -3.2255 | 5.8306  |
| 102 | H | 4.3012  | -2.3953 | 4.0347  |



|     |    |        |         |        |
|-----|----|--------|---------|--------|
| 103 | C  | 2.2754 | -3.8282 | 6.3846 |
| 104 | H  | 0.2693 | -4.5398 | 6.0178 |
| 105 | H  | 4.2846 | -3.0372 | 6.4516 |
| 106 | H  | 2.2664 | -4.1082 | 7.4350 |
| 107 | Cl | 2.3141 | -2.5660 | 1.7064 |

large\_basis\_THF\_THF\_bb

Energy (POTENTIAL) = -232.533030898 Eh

|    | Atom | X       | Y       | Z       |
|----|------|---------|---------|---------|
| 1  | C    | 0.6701  | 0.6052  | 0.8900  |
| 2  | O    | 1.7199  | -0.1900 | 0.3188  |
| 3  | C    | 2.4914  | 0.6124  | -0.5897 |
| 4  | C    | 2.0440  | 2.0628  | -0.3776 |
| 5  | C    | 0.5770  | 1.8715  | 0.0347  |
| 6  | H    | -0.2542 | 0.0149  | 0.8954  |
| 7  | H    | 0.9214  | 0.8529  | 1.9338  |
| 8  | H    | 3.5576  | 0.4551  | -0.3846 |
| 9  | H    | 2.2918  | 0.2850  | -1.6220 |
| 10 | H    | 2.6105  | 2.5224  | 0.4416  |
| 11 | H    | 2.1731  | 2.6790  | -1.2726 |
| 12 | H    | 0.1592  | 2.7225  | 0.5817  |
| 13 | H    | -0.0462 | 1.6888  | -0.8494 |

large\_basis\_B-5-Br\_NiIMes2\_BrPh\_bb  
Energy (POTENTIAL) = -2263.28686329 Eh

|    | Atom | X       | Y       | Z       |
|----|------|---------|---------|---------|
| 1  | C    | -0.0388 | -0.0133 | -0.1505 |
| 2  | C    | 1.0120  | 0.7370  | -0.5602 |
| 3  | C    | 1.6727  | -1.4650 | -0.6568 |
| 4  | N    | 0.3725  | -1.3431 | -0.2129 |
| 5  | N    | 2.0404  | -0.1541 | -0.8630 |
| 6  | Ni   | 2.6947  | -3.0035 | -0.9323 |
| 7  | C    | 3.7111  | -4.5114 | -1.3575 |
| 8  | N    | 5.0066  | -4.8336 | -1.0075 |
| 9  | N    | 3.3331  | -5.5917 | -2.1218 |
| 10 | C    | 5.4048  | -6.0585 | -1.5396 |
| 11 | C    | 4.3509  | -6.5367 | -2.2429 |
| 12 | H    | 6.3909  | -6.4617 | -1.3680 |
| 13 | H    | 4.2229  | -7.4448 | -2.8120 |
| 14 | H    | -1.0299 | 0.2638  | 0.1741  |
| 15 | H    | 1.1302  | 1.8045  | -0.6666 |
| 16 | C    | 2.0438  | -5.7530 | -2.7312 |
| 17 | C    | 1.0069  | -6.3388 | -1.9878 |
| 18 | C    | 1.8760  | -5.3726 | -4.0716 |
| 19 | C    | -0.2095 | -6.5750 | -2.6353 |
| 20 | C    | 0.6364  | -5.6152 | -4.6736 |
| 21 | C    | -0.4130 | -6.2233 | -3.9749 |
| 22 | H    | -1.0193 | -7.0387 | -2.0771 |
| 23 | H    | 0.4893  | -5.3233 | -5.7112 |
| 24 | C    | 5.8579  | -4.0140 | -0.1945 |
| 25 | C    | 6.3798  | -2.8282 | -0.7358 |
| 26 | C    | 6.1678  | -4.4333 | 1.1114  |
| 27 | C    | 7.2112  | -2.0471 | 0.0753  |
| 28 | C    | 6.9964  | -3.6148 | 1.8847  |
| 29 | C    | 7.5238  | -2.4169 | 1.3870  |
| 30 | H    | 7.6182  | -1.1247 | -0.3304 |
| 31 | H    | 7.2303  | -3.9191 | 2.9033  |
| 32 | C    | -0.4621 | -2.4496 | 0.1565  |
| 33 | C    | -0.9850 | -3.2759 | -0.8537 |
| 34 | C    | -0.7530 | -2.6611 | 1.5130  |
| 35 | C    | -1.7967 | -4.3464 | -0.4687 |
| 36 | C    | -1.5670 | -3.7498 | 1.8492  |
| 37 | C    | -2.0903 | -4.6064 | 0.8760  |
| 38 | H    | -2.2056 | -4.9956 | -1.2385 |
| 39 | H    | -1.7894 | -3.9331 | 2.8984  |
| 40 | C    | 3.3391  | 0.2689  | -1.3041 |
| 41 | C    | 4.3619  | 0.4140  | -0.3542 |
| 42 | C    | 3.5336  | 0.5742  | -2.6610 |
| 43 | C    | 5.5966  | 0.9049  | -0.7908 |
| 44 | C    | 4.7894  | 1.0484  | -3.0535 |
| 45 | C    | 5.8294  | 1.2267  | -2.1324 |
| 46 | H    | 6.3977  | 1.0269  | -0.0658 |
| 47 | H    | 4.9592  | 1.2839  | -4.1021 |
| 48 | C    | 2.9943  | -4.6911 | -4.8190 |
| 49 | H    | 3.2643  | -3.7497 | -4.3236 |
| 50 | H    | 3.9019  | -5.3064 | -4.8465 |
| 51 | H    | 2.7011  | -4.4675 | -5.8495 |

|     |    |         |         |         |
|-----|----|---------|---------|---------|
| 52  | C  | 1.1951  | -6.6504 | -0.5264 |
| 53  | H  | 2.0805  | -7.2744 | -0.3532 |
| 54  | H  | 1.3472  | -5.7203 | 0.0346  |
| 55  | H  | 0.3224  | -7.1676 | -0.1161 |
| 56  | C  | -1.7565 | -6.4446 | -4.6278 |
| 57  | H  | -1.6721 | -6.5055 | -5.7183 |
| 58  | H  | -2.2313 | -7.3648 | -4.2685 |
| 59  | H  | -2.4424 | -5.6168 | -4.3995 |
| 60  | C  | 5.6378  | -5.7297 | 1.6745  |
| 61  | H  | 6.2874  | -6.5750 | 1.4087  |
| 62  | H  | 5.5865  | -5.6836 | 2.7669  |
| 63  | H  | 4.6368  | -5.9511 | 1.2975  |
| 64  | C  | 6.0299  | -2.3849 | -2.1324 |
| 65  | H  | 6.0798  | -3.2159 | -2.8455 |
| 66  | H  | 4.9996  | -2.0072 | -2.1562 |
| 67  | H  | 6.6997  | -1.5904 | -2.4728 |
| 68  | C  | 8.4230  | -1.5582 | 2.2451  |
| 69  | H  | 9.4106  | -2.0208 | 2.3763  |
| 70  | H  | 8.5780  | -0.5694 | 1.7998  |
| 71  | H  | 8.0007  | -1.4156 | 3.2472  |
| 72  | C  | 4.1389  | 0.0051  | 1.0782  |
| 73  | H  | 3.2730  | 0.5173  | 1.5162  |
| 74  | H  | 3.9324  | -1.0705 | 1.1295  |
| 75  | H  | 5.0173  | 0.2223  | 1.6934  |
| 76  | C  | 2.4241  | 0.3655  | -3.6612 |
| 77  | H  | 1.5422  | 0.9731  | -3.4238 |
| 78  | H  | 2.7525  | 0.6239  | -4.6728 |
| 79  | H  | 2.0974  | -0.6820 | -3.6611 |
| 80  | C  | 7.1901  | 1.6985  | -2.5864 |
| 81  | H  | 7.1153  | 2.4346  | -3.3950 |
| 82  | H  | 7.7541  | 2.1512  | -1.7635 |
| 83  | H  | 7.7871  | 0.8587  | -2.9686 |
| 84  | C  | -0.6581 | -3.0338 | -2.3043 |
| 85  | H  | -0.7836 | -1.9787 | -2.5757 |
| 86  | H  | 0.3907  | -3.2908 | -2.5005 |
| 87  | H  | -1.2920 | -3.6402 | -2.9565 |
| 88  | C  | -0.2164 | -1.7457 | 2.5861  |
| 89  | H  | -0.8326 | -0.8420 | 2.6868  |
| 90  | H  | -0.2070 | -2.2510 | 3.5567  |
| 91  | H  | 0.8034  | -1.4254 | 2.3590  |
| 92  | C  | -2.9303 | -5.8026 | 1.2560  |
| 93  | H  | -3.2874 | -5.7341 | 2.2891  |
| 94  | H  | -3.8029 | -5.9057 | 0.5997  |
| 95  | H  | -2.3518 | -6.7324 | 1.1683  |
| 96  | Br | 2.6993  | -3.6976 | 1.8251  |
| 97  | C  | 2.6875  | -4.1471 | 3.7541  |
| 98  | C  | 2.7328  | -5.4857 | 4.1522  |
| 99  | C  | 2.6300  | -3.1232 | 4.7032  |
| 100 | C  | 2.7190  | -5.7992 | 5.5151  |
| 101 | H  | 2.7797  | -6.2751 | 3.4073  |
| 102 | C  | 2.6166  | -3.4464 | 6.0638  |
| 103 | H  | 2.5932  | -2.0851 | 4.3847  |
| 104 | C  | 2.6604  | -4.7825 | 6.4727  |
| 105 | H  | 2.7542  | -6.8407 | 5.8257  |
| 106 | H  | 2.5713  | -2.6505 | 6.8035  |

107

H

2.6494

-5.0297

7.5308

large\_basis\_TS-A-5-6-I\_NiITMe2\_IPh\_ossts\_t\_bb

Energy (POTENTIAL) = -1179.64172017 Eh

|    | Atom | X       | Y       | Z       |
|----|------|---------|---------|---------|
| 1  | C    | -0.9927 | 1.7727  | 0.1472  |
| 2  | C    | 0.0286  | 2.5877  | -0.2508 |
| 3  | C    | 0.7618  | 0.4238  | -0.4532 |
| 4  | N    | -0.5243 | 0.4664  | 0.0110  |
| 5  | N    | 1.0803  | 1.7449  | -0.6105 |
| 6  | Ni   | 1.8537  | -1.1003 | -0.7579 |
| 7  | C    | 2.8962  | -2.6008 | -1.2834 |
| 8  | N    | 4.2191  | -2.8604 | -1.0528 |
| 9  | N    | 2.4692  | -3.7211 | -1.9434 |
| 10 | C    | 4.6039  | -4.1091 | -1.5394 |
| 11 | C    | 3.4900  | -4.6567 | -2.1095 |
| 12 | C    | 2.2763  | -2.1725 | 4.1708  |
| 13 | C    | 2.2468  | -3.5036 | 4.5970  |
| 14 | C    | 2.4463  | -1.1476 | 5.1064  |
| 15 | C    | 2.3851  | -3.8091 | 5.9564  |
| 16 | H    | 2.1170  | -4.3067 | 3.8736  |
| 17 | C    | 2.5852  | -1.4540 | 6.4658  |
| 18 | H    | 2.4720  | -0.1086 | 4.7822  |
| 19 | C    | 2.5545  | -2.7849 | 6.8929  |
| 20 | H    | 2.3611  | -4.8471 | 6.2825  |
| 21 | H    | 2.7170  | -0.6524 | 7.1900  |
| 22 | H    | 2.6624  | -3.0223 | 7.9483  |
| 23 | I    | 2.0641  | -1.6791 | 1.9503  |
| 24 | C    | -1.3048 | -0.7118 | 0.3569  |
| 25 | H    | -2.2467 | -0.7225 | -0.2009 |
| 26 | H    | -0.7165 | -1.5929 | 0.0976  |
| 27 | H    | -1.5221 | -0.7294 | 1.4297  |
| 28 | C    | 2.3704  | 2.2174  | -1.0884 |
| 29 | H    | 2.8410  | 2.8678  | -0.3441 |
| 30 | H    | 3.0032  | 1.3438  | -1.2579 |
| 31 | H    | 2.2558  | 2.7714  | -2.0260 |
| 32 | C    | 0.1259  | 4.0737  | -0.3346 |
| 33 | H    | -0.8125 | 4.5361  | -0.0155 |
| 34 | H    | 0.9270  | 4.4646  | 0.3060  |
| 35 | H    | 0.3348  | 4.4094  | -1.3586 |
| 36 | C    | -2.3657 | 2.0857  | 0.6377  |
| 37 | H    | -3.1378 | 1.6625  | -0.0181 |
| 38 | H    | -2.5369 | 1.6835  | 1.6444  |
| 39 | H    | -2.5182 | 3.1677  | 0.6782  |
| 40 | C    | 5.1126  | -1.9632 | -0.3367 |
| 41 | H    | 6.0054  | -1.7575 | -0.9358 |
| 42 | H    | 4.5756  | -1.0329 | -0.1480 |
| 43 | H    | 5.4129  | -2.4020 | 0.6202  |
| 44 | C    | 1.0991  | -3.9344 | -2.3829 |
| 45 | H    | 0.5275  | -3.0344 | -2.1471 |
| 46 | H    | 1.0646  | -4.1159 | -3.4621 |
| 47 | H    | 0.6575  | -4.7902 | -1.8614 |
| 48 | C    | 3.2824  | -5.9592 | -2.8056 |
| 49 | H    | 4.2085  | -6.5409 | -2.8083 |
| 50 | H    | 2.5073  | -6.5629 | -2.3164 |
| 51 | H    | 2.9735  | -5.8171 | -3.8495 |

|    |   |        |         |         |
|----|---|--------|---------|---------|
| 52 | C | 5.9938 | -4.6318 | -1.4030 |
| 53 | H | 6.7217 | -3.9969 | -1.9247 |
| 54 | H | 6.3033 | -4.6851 | -0.3514 |
| 55 | H | 6.0648 | -5.6383 | -1.8245 |

large\_basis\_TS-D-5-6-Cl\_NiIPhen2\_ossts\_PhCl\_t\_oss\_bb  
Energy (POTENTIAL) = -2238.33779493 Eh

|    | Atom | X       | Y       | Z       |
|----|------|---------|---------|---------|
| 1  | C    | -0.2933 | 1.1673  | 0.5594  |
| 2  | C    | 0.7123  | 1.8786  | -0.0016 |
| 3  | C    | 1.2008  | -0.3461 | -0.3015 |
| 4  | N    | 0.0089  | -0.1803 | 0.3616  |
| 5  | N    | 1.6050  | 0.9499  | -0.5312 |
| 6  | Ni   | 2.2523  | -1.8840 | -0.6960 |
| 7  | C    | 3.4867  | -3.1882 | -1.3216 |
| 8  | N    | 4.7835  | -3.3811 | -0.9090 |
| 9  | N    | 3.3277  | -4.1469 | -2.2939 |
| 10 | C    | 5.3998  | -4.4231 | -1.6007 |
| 11 | C    | 4.4867  | -4.9010 | -2.4781 |
| 12 | H    | 6.4232  | -4.7091 | -1.4142 |
| 13 | H    | 4.5409  | -5.7076 | -3.1925 |
| 14 | H    | -1.2030 | 1.4862  | 1.0435  |
| 15 | H    | 0.8627  | 2.9423  | -0.1022 |
| 16 | C    | 2.1100  | -4.3674 | -3.0050 |
| 17 | C    | 0.8984  | -4.4070 | -2.3055 |
| 18 | C    | 2.1383  | -4.5468 | -4.3906 |
| 19 | C    | -0.2909 | -4.6083 | -3.0068 |
| 20 | C    | 0.9428  | -4.7618 | -5.0809 |
| 21 | C    | -0.2734 | -4.7868 | -4.3936 |
| 22 | H    | -1.2320 | -4.6362 | -2.4643 |
| 23 | H    | 0.9648  | -4.8984 | -6.1586 |
| 24 | C    | 5.4239  | -2.6271 | 0.1226  |
| 25 | C    | 5.3476  | -1.2311 | 0.1199  |
| 26 | C    | 6.1212  | -3.2995 | 1.1297  |
| 27 | C    | 5.9590  | -0.5095 | 1.1454  |
| 28 | C    | 6.7421  | -2.5672 | 2.1444  |
| 29 | C    | 6.6575  | -1.1724 | 2.1587  |
| 30 | H    | 5.8926  | 0.5747  | 1.1416  |
| 31 | H    | 7.2794  | -3.0915 | 2.9299  |
| 32 | C    | -0.8229 | -1.2488 | 0.8104  |
| 33 | C    | -1.0635 | -2.3400 | -0.0290 |
| 34 | C    | -1.3951 | -1.1912 | 2.0837  |
| 35 | C    | -1.8668 | -3.3871 | 0.4203  |
| 36 | C    | -2.2107 | -2.2374 | 2.5192  |
| 37 | C    | -2.4446 | -3.3399 | 1.6930  |
| 38 | H    | -2.0469 | -4.2395 | -0.2291 |
| 39 | H    | -2.6492 | -2.1950 | 3.5124  |
| 40 | C    | 2.8293  | 1.2876  | -1.1795 |
| 41 | C    | 3.6943  | 2.2132  | -0.5905 |
| 42 | C    | 3.1660  | 0.6660  | -2.3876 |
| 43 | C    | 4.9094  | 2.5117  | -1.2125 |
| 44 | C    | 4.3878  | 0.9612  | -2.9943 |
| 45 | C    | 5.2621  | 1.8823  | -2.4093 |
| 46 | H    | 5.5852  | 3.2262  | -0.7510 |
| 47 | H    | 4.6520  | 0.4722  | -3.9278 |
| 48 | C    | 2.1202  | -3.5693 | 3.5566  |
| 49 | C    | 0.9164  | -3.9306 | 4.1488  |
| 50 | C    | 3.3162  | -3.5716 | 4.2639  |
| 51 | C    | 0.9126  | -4.3144 | 5.4971  |



|    |    |         |         |         |
|----|----|---------|---------|---------|
| 52 | H  | -0.0077 | -3.9116 | 3.5746  |
| 53 | C  | 3.3069  | -3.9562 | 5.6116  |
| 54 | H  | 4.2443  | -3.2768 | 3.7773  |
| 55 | C  | 2.1063  | -4.3274 | 6.2273  |
| 56 | H  | -0.0213 | -4.6018 | 5.9771  |
| 57 | H  | 4.2354  | -3.9653 | 6.1800  |
| 58 | H  | 2.1006  | -4.6241 | 7.2733  |
| 59 | Cl | 2.1356  | -2.9196 | 1.5793  |
| 60 | H  | 3.4280  | 2.6720  | 0.3570  |
| 61 | H  | 6.2120  | 2.1094  | -2.8850 |
| 62 | H  | 2.4772  | -0.0441 | -2.8330 |
| 63 | H  | 7.1342  | -0.6059 | 2.9540  |
| 64 | H  | -1.1811 | -0.3498 | 2.7357  |
| 65 | H  | -3.0738 | -4.1559 | 2.0377  |
| 66 | H  | -0.6084 | -2.3649 | -1.0123 |
| 67 | H  | 3.0840  | -4.5014 | -4.9228 |
| 68 | H  | -1.2018 | -4.9484 | -4.9345 |
| 69 | H  | 0.9008  | -4.2765 | -1.2291 |
| 70 | H  | 6.1540  | -4.3849 | 1.1317  |
| 71 | H  | 4.8132  | -0.7240 | -0.6745 |

large\_basis\_TS-A-5-6-Cl\_NiITMe2\_ossts\_PhCl\_t\_bb  
Energy (POTENTIAL) = -1628.46336906 Eh

|    | Atom | X       | Y       | Z       |
|----|------|---------|---------|---------|
| 1  | C    | -0.5129 | 1.0025  | 0.0796  |
| 2  | C    | 0.5044  | 1.8031  | -0.3546 |
| 3  | C    | 1.2534  | -0.3643 | -0.4424 |
| 4  | N    | -0.0341 | -0.3062 | 0.0135  |
| 5  | N    | 1.5637  | 0.9493  | -0.6653 |
| 6  | Ni   | 2.3567  | -1.9036 | -0.6893 |
| 7  | C    | 3.4530  | -3.3653 | -1.2441 |
| 8  | N    | 4.6948  | -3.7260 | -0.7996 |
| 9  | N    | 3.1615  | -4.3311 | -2.1689 |
| 10 | C    | 5.1624  | -4.8841 | -1.4206 |
| 11 | C    | 4.1859  | -5.2701 | -2.2934 |
| 12 | C    | 2.2804  | -3.0883 | 3.7539  |
| 13 | C    | 1.0773  | -3.3755 | 4.3870  |
| 14 | C    | 3.4881  | -3.1009 | 4.4411  |
| 15 | C    | 1.0849  | -3.6881 | 5.7532  |
| 16 | H    | 0.1416  | -3.3584 | 3.8309  |
| 17 | C    | 3.4914  | -3.4137 | 5.8070  |
| 18 | H    | 4.4189  | -2.8696 | 3.9262  |
| 19 | C    | 2.2907  | -3.7068 | 6.4624  |
| 20 | H    | 0.1504  | -3.9154 | 6.2630  |
| 21 | H    | 4.4300  | -3.4276 | 6.3579  |
| 22 | H    | 2.2945  | -3.9487 | 7.5223  |
| 23 | Cl   | 2.2817  | -2.5959 | 1.7561  |
| 24 | C    | -1.8901 | 1.3286  | 0.5495  |
| 25 | H    | -2.0475 | 2.4107  | 0.5493  |
| 26 | H    | -2.6572 | 0.8776  | -0.0936 |
| 27 | H    | -2.0653 | 0.9633  | 1.5696  |
| 28 | C    | 0.5939  | 3.2833  | -0.5149 |
| 29 | H    | 1.3933  | 3.7111  | 0.1040  |
| 30 | H    | 0.8011  | 3.5664  | -1.5552 |
| 31 | H    | -0.3467 | 3.7572  | -0.2202 |
| 32 | C    | -0.8109 | -1.4720 | 0.4047  |
| 33 | H    | -1.7562 | -1.5015 | -0.1469 |
| 34 | H    | -0.2222 | -2.3600 | 0.1737  |
| 35 | H    | -1.0233 | -1.4525 | 1.4786  |
| 36 | C    | 2.8540  | 1.4064  | -1.1572 |
| 37 | H    | 3.3247  | 2.0806  | -0.4342 |
| 38 | H    | 3.4877  | 0.5281  | -1.2978 |
| 39 | H    | 2.7399  | 1.9304  | -2.1122 |
| 40 | C    | 5.4395  | -2.9965 | 0.2150  |
| 41 | H    | 4.8682  | -2.1056 | 0.4754  |
| 42 | H    | 5.5734  | -3.6101 | 1.1116  |
| 43 | H    | 6.4225  | -2.7060 | -0.1701 |
| 44 | C    | 1.9185  | -4.3874 | -2.9223 |
| 45 | H    | 1.3637  | -5.3011 | -2.6840 |
| 46 | H    | 1.3182  | -3.5186 | -2.6436 |
| 47 | H    | 2.1194  | -4.3625 | -3.9985 |
| 48 | C    | 4.1102  | -6.4216 | -3.2383 |
| 49 | H    | 5.0156  | -7.0312 | -3.1698 |
| 50 | H    | 3.2516  | -7.0700 | -3.0208 |
| 51 | H    | 4.0100  | -6.0861 | -4.2789 |

|    |   |        |         |         |
|----|---|--------|---------|---------|
| 52 | C | 6.4904 | -5.4850 | -1.1054 |
| 53 | H | 7.3122 | -4.7871 | -1.3119 |
| 54 | H | 6.5642 | -5.7715 | -0.0483 |
| 55 | H | 6.6549 | -6.3826 | -1.7078 |

large\_basis\_B-6-I\_NiII Mes2\_bb  
 Energy (POTENTIAL) = -2029.87272324 Eh

|    | Atom | X       | Y       | Z       |
|----|------|---------|---------|---------|
| 1  | C    | 0.0306  | 0.0548  | 0.0376  |
| 2  | C    | 1.1687  | 0.7748  | -0.1128 |
| 3  | C    | 1.7171  | -1.4263 | -0.4006 |
| 4  | N    | 0.3817  | -1.2800 | -0.1404 |
| 5  | N    | 2.1832  | -0.1430 | -0.3787 |
| 6  | Ni   | 2.7143  | -3.0820 | -0.6968 |
| 7  | C    | 3.7092  | -4.6330 | -1.3536 |
| 8  | N    | 5.0517  | -4.8760 | -1.2586 |
| 9  | N    | 3.2303  | -5.7521 | -1.9726 |
| 10 | C    | 5.3947  | -6.1118 | -1.7994 |
| 11 | C    | 4.2439  | -6.6663 | -2.2514 |
| 12 | H    | 6.4132  | -6.4673 | -1.8101 |
| 13 | H    | 4.0434  | -7.6081 | -2.7386 |
| 14 | H    | -0.9838 | 0.3544  | 0.2498  |
| 15 | H    | 1.3604  | 1.8351  | -0.0566 |
| 16 | C    | 1.8618  | -5.9729 | -2.3519 |
| 17 | C    | 1.0556  | -6.7919 | -1.5465 |
| 18 | C    | 1.3988  | -5.4127 | -3.5517 |
| 19 | C    | -0.2409 | -7.0680 | -1.9922 |
| 20 | C    | 0.0946  | -5.7169 | -3.9553 |
| 21 | C    | -0.7329 | -6.5528 | -3.1969 |
| 22 | H    | -0.8823 | -7.6979 | -1.3799 |
| 23 | H    | -0.2815 | -5.2907 | -4.8826 |
| 24 | C    | 6.0114  | -3.9467 | -0.7294 |
| 25 | C    | 6.3522  | -2.8259 | -1.5038 |
| 26 | C    | 6.6086  | -4.2072 | 0.5128  |
| 27 | C    | 7.3035  | -1.9422 | -0.9900 |
| 28 | C    | 7.5422  | -3.2813 | 0.9935  |
| 29 | C    | 7.8949  | -2.1417 | 0.2631  |
| 30 | H    | 7.5821  | -1.0743 | -1.5791 |
| 31 | H    | 8.0027  | -3.4590 | 1.9628  |
| 32 | C    | -0.5655 | -2.3600 | -0.1179 |
| 33 | C    | -0.9654 | -2.9219 | -1.3415 |
| 34 | C    | -1.0922 | -2.7860 | 1.1098  |
| 35 | C    | -1.8995 | -3.9593 | -1.3086 |
| 36 | C    | -2.0106 | -3.8427 | 1.0916  |
| 37 | C    | -2.4186 | -4.4454 | -0.1024 |
| 38 | H    | -2.2273 | -4.3986 | -2.2458 |
| 39 | H    | -2.4179 | -4.1975 | 2.0357  |
| 40 | C    | 3.5373  | 0.2607  | -0.6437 |
| 41 | C    | 4.3887  | 0.5358  | 0.4352  |
| 42 | C    | 3.9371  | 0.4347  | -1.9789 |
| 43 | C    | 5.6642  | 1.0363  | 0.1465  |
| 44 | C    | 5.2215  | 0.9302  | -2.2169 |
| 45 | C    | 6.0915  | 1.2529  | -1.1668 |
| 46 | H    | 6.3375  | 1.2598  | 0.9706  |
| 47 | H    | 5.5497  | 1.0718  | -3.2445 |
| 48 | C    | 2.2800  | -4.4996 | -4.3676 |
| 49 | H    | 2.5853  | -3.6235 | -3.7824 |
| 50 | H    | 3.2016  | -5.0053 | -4.6818 |
| 51 | H    | 1.7586  | -4.1495 | -5.2635 |

|    |   |         |         |         |
|----|---|---------|---------|---------|
| 52 | C | 1.5734  | -7.3449 | -0.2434 |
| 53 | H | 2.4182  | -8.0271 | -0.4011 |
| 54 | H | 1.9294  | -6.5381 | 0.4082  |
| 55 | H | 0.7883  | -7.8925 | 0.2867  |
| 56 | C | -2.1278 | -6.8923 | -3.6647 |
| 57 | H | -2.1333 | -7.8263 | -4.2431 |
| 58 | H | -2.8100 | -7.0311 | -2.8191 |
| 59 | H | -2.5381 | -6.1081 | -4.3104 |
| 60 | C | 6.2899  | -5.4599 | 1.2902  |
| 61 | H | 6.8517  | -6.3193 | 0.8995  |
| 62 | H | 6.5566  | -5.3412 | 2.3449  |
| 63 | H | 5.2266  | -5.7071 | 1.2349  |
| 64 | C | 5.7125  | -2.5854 | -2.8484 |
| 65 | H | 5.7670  | -3.4764 | -3.4856 |
| 66 | H | 4.6519  | -2.3381 | -2.7319 |
| 67 | H | 6.1991  | -1.7561 | -3.3694 |
| 68 | C | 8.8625  | -1.1274 | 0.8231  |
| 69 | H | 9.5796  | -1.5881 | 1.5114  |
| 70 | H | 9.4239  | -0.6251 | 0.0274  |
| 71 | H | 8.3247  | -0.3508 | 1.3833  |
| 72 | C | 3.9488  | 0.2839  | 1.8544  |
| 73 | H | 3.0349  | 0.8371  | 2.1023  |
| 74 | H | 3.7299  | -0.7802 | 2.0079  |
| 75 | H | 4.7297  | 0.5777  | 2.5623  |
| 76 | C | 3.0066  | 0.0829  | -3.1129 |
| 77 | H | 2.0824  | 0.6731  | -3.0741 |
| 78 | H | 3.4841  | 0.2578  | -4.0817 |
| 79 | H | 2.7077  | -0.9713 | -3.0627 |
| 80 | C | 7.4623  | 1.8157  | -1.4577 |
| 81 | H | 7.3932  | 2.8348  | -1.8607 |
| 82 | H | 8.0805  | 1.8568  | -0.5552 |
| 83 | H | 7.9924  | 1.2136  | -2.2057 |
| 84 | C | -0.4095 | -2.4116 | -2.6478 |
| 85 | H | -0.5248 | -1.3239 | -2.7341 |
| 86 | H | 0.6617  | -2.6274 | -2.7249 |
| 87 | H | -0.9137 | -2.8811 | -3.4969 |
| 88 | C | -0.7191 | -2.1073 | 2.4037  |
| 89 | H | -1.2449 | -1.1489 | 2.5119  |
| 90 | H | -0.9873 | -2.7326 | 3.2607  |
| 91 | H | 0.3542  | -1.9056 | 2.4552  |
| 92 | C | -3.3754 | -5.6130 | -0.0969 |
| 93 | H | -3.9772 | -5.6392 | 0.8179  |
| 94 | H | -4.0575 | -5.5797 | -0.9543 |
| 95 | H | -2.8258 | -6.5622 | -0.1551 |
| 96 | I | 2.7324  | -3.8975 | 2.0445  |

large\_basis\_TS-A-5-6-Cl\_NiITMe2\_ossts\_PhCl\_t\_oss\_bb  
 Energy (POTENTIAL) = -1628.48697466 Eh

|    | Atom | X       | Y       | Z       |
|----|------|---------|---------|---------|
| 1  | C    | -0.5129 | 1.0025  | 0.0796  |
| 2  | C    | 0.5044  | 1.8031  | -0.3546 |
| 3  | C    | 1.2534  | -0.3643 | -0.4424 |
| 4  | N    | -0.0341 | -0.3062 | 0.0135  |
| 5  | N    | 1.5637  | 0.9493  | -0.6653 |
| 6  | Ni   | 2.3567  | -1.9036 | -0.6893 |
| 7  | C    | 3.4530  | -3.3653 | -1.2441 |
| 8  | N    | 4.6948  | -3.7260 | -0.7996 |
| 9  | N    | 3.1615  | -4.3311 | -2.1689 |
| 10 | C    | 5.1624  | -4.8841 | -1.4206 |
| 11 | C    | 4.1859  | -5.2701 | -2.2934 |
| 12 | C    | 2.2804  | -3.0883 | 3.7539  |
| 13 | C    | 1.0773  | -3.3755 | 4.3870  |
| 14 | C    | 3.4881  | -3.1009 | 4.4411  |
| 15 | C    | 1.0849  | -3.6881 | 5.7532  |
| 16 | H    | 0.1416  | -3.3584 | 3.8309  |
| 17 | C    | 3.4914  | -3.4137 | 5.8070  |
| 18 | H    | 4.4189  | -2.8696 | 3.9262  |
| 19 | C    | 2.2907  | -3.7068 | 6.4624  |
| 20 | H    | 0.1504  | -3.9154 | 6.2630  |
| 21 | H    | 4.4300  | -3.4276 | 6.3579  |
| 22 | H    | 2.2945  | -3.9487 | 7.5223  |
| 23 | Cl   | 2.2817  | -2.5959 | 1.7561  |
| 24 | C    | -1.8901 | 1.3286  | 0.5495  |
| 25 | H    | -2.0475 | 2.4107  | 0.5493  |
| 26 | H    | -2.6572 | 0.8776  | -0.0936 |
| 27 | H    | -2.0653 | 0.9633  | 1.5696  |
| 28 | C    | 0.5939  | 3.2833  | -0.5149 |
| 29 | H    | 1.3933  | 3.7111  | 0.1040  |
| 30 | H    | 0.8011  | 3.5664  | -1.5552 |
| 31 | H    | -0.3467 | 3.7572  | -0.2202 |
| 32 | C    | -0.8109 | -1.4720 | 0.4047  |
| 33 | H    | -1.7562 | -1.5015 | -0.1469 |
| 34 | H    | -0.2222 | -2.3600 | 0.1737  |
| 35 | H    | -1.0233 | -1.4525 | 1.4786  |
| 36 | C    | 2.8540  | 1.4064  | -1.1572 |
| 37 | H    | 3.3247  | 2.0806  | -0.4342 |
| 38 | H    | 3.4877  | 0.5281  | -1.2978 |
| 39 | H    | 2.7399  | 1.9304  | -2.1122 |
| 40 | C    | 5.4395  | -2.9965 | 0.2150  |
| 41 | H    | 4.8682  | -2.1056 | 0.4754  |
| 42 | H    | 5.5734  | -3.6101 | 1.1116  |
| 43 | H    | 6.4225  | -2.7060 | -0.1701 |
| 44 | C    | 1.9185  | -4.3874 | -2.9223 |
| 45 | H    | 1.3637  | -5.3011 | -2.6840 |
| 46 | H    | 1.3182  | -3.5186 | -2.6436 |
| 47 | H    | 2.1194  | -4.3625 | -3.9985 |
| 48 | C    | 4.1102  | -6.4216 | -3.2383 |
| 49 | H    | 5.0156  | -7.0312 | -3.1698 |
| 50 | H    | 3.2516  | -7.0700 | -3.0208 |
| 51 | H    | 4.0100  | -6.0861 | -4.2789 |

|    |   |        |         |         |
|----|---|--------|---------|---------|
| 52 | C | 6.4904 | -5.4850 | -1.1054 |
| 53 | H | 7.3122 | -4.7871 | -1.3119 |
| 54 | H | 6.5642 | -5.7715 | -0.0483 |
| 55 | H | 6.6549 | -6.3826 | -1.7078 |

large\_basis\_B-1\_NiIMes2\_bb  
 Energy (POTENTIAL) = -2018.38016785 Eh

|    | Atom | X       | Y       | Z       |
|----|------|---------|---------|---------|
| 1  | C    | 1.2518  | 0.9098  | 0.0000  |
| 2  | C    | 2.3492  | 1.6683  | -0.2485 |
| 3  | C    | 2.9535  | -0.5249 | -0.5697 |
| 4  | N    | 1.6314  | -0.4165 | -0.2001 |
| 5  | N    | 3.3728  | 0.7865  | -0.5906 |
| 6  | Ni   | 3.9284  | -2.0390 | -0.9724 |
| 7  | C    | 4.9133  | -3.5418 | -1.3891 |
| 8  | N    | 6.2448  | -3.7934 | -1.1394 |
| 9  | N    | 4.4994  | -4.6935 | -2.0192 |
| 10 | C    | 6.6332  | -5.0517 | -1.5959 |
| 11 | C    | 5.5327  | -5.6189 | -2.1519 |
| 12 | H    | 7.6422  | -5.4175 | -1.4810 |
| 13 | H    | 5.3858  | -6.5789 | -2.6229 |
| 14 | H    | 0.2502  | 1.1816  | 0.2967  |
| 15 | H    | 2.5003  | 2.7365  | -0.2153 |
| 16 | C    | 3.1500  | -4.8975 | -2.4639 |
| 17 | C    | 2.2460  | -5.5498 | -1.6140 |
| 18 | C    | 2.7711  | -4.4230 | -3.7307 |
| 19 | C    | 0.9413  | -5.7572 | -2.0763 |
| 20 | C    | 1.4541  | -4.6384 | -4.1447 |
| 21 | C    | 0.5284  | -5.3103 | -3.3351 |
| 22 | H    | 0.2273  | -6.2579 | -1.4269 |
| 23 | H    | 1.1406  | -4.2689 | -5.1192 |
| 24 | C    | 7.1097  | -2.8551 | -0.4817 |
| 25 | C    | 7.9674  | -2.0593 | -1.2562 |
| 26 | C    | 7.0615  | -2.7486 | 0.9188  |
| 27 | C    | 8.8096  | -1.1607 | -0.5923 |
| 28 | C    | 7.9119  | -1.8279 | 1.5374  |
| 29 | C    | 8.7966  | -1.0309 | 0.7997  |
| 30 | H    | 9.4724  | -0.5306 | -1.1807 |
| 31 | H    | 7.8782  | -1.7256 | 2.6204  |
| 32 | C    | 0.7596  | -1.5488 | -0.0583 |
| 33 | C    | -0.0685 | -1.9109 | -1.1303 |
| 34 | C    | 0.7738  | -2.2704 | 1.1475  |
| 35 | C    | -0.9259 | -3.0037 | -0.9582 |
| 36 | C    | -0.0889 | -3.3627 | 1.2689  |
| 37 | C    | -0.9515 | -3.7387 | 0.2307  |
| 38 | H    | -1.5710 | -3.2989 | -1.7821 |
| 39 | H    | -0.0846 | -3.9384 | 2.1926  |
| 40 | C    | 4.7062  | 1.1774  | -0.9519 |
| 41 | C    | 5.6334  | 1.4611  | 0.0620  |
| 42 | C    | 5.0485  | 1.2504  | -2.3126 |
| 43 | C    | 6.9198  | 1.8601  | -0.3159 |
| 44 | C    | 6.3511  | 1.6365  | -2.6425 |
| 45 | C    | 7.2969  | 1.9536  | -1.6596 |
| 46 | H    | 7.6514  | 2.0747  | 0.4596  |
| 47 | H    | 6.6357  | 1.6845  | -3.6917 |
| 48 | C    | 3.7508  | -3.6575 | -4.5819 |
| 49 | H    | 4.0575  | -2.7410 | -4.0612 |
| 50 | H    | 4.6636  | -4.2349 | -4.7734 |
| 51 | H    | 3.3084  | -3.3817 | -5.5443 |



|    |   |         |         |         |
|----|---|---------|---------|---------|
| 52 | C | 2.6592  | -5.9530 | -0.2219 |
| 53 | H | 3.5163  | -6.6375 | -0.2293 |
| 54 | H | 2.9610  | -5.0658 | 0.3490  |
| 55 | H | 1.8349  | -6.4397 | 0.3084  |
| 56 | C | -0.8887 | -5.5215 | -3.8125 |
| 57 | H | -0.9173 | -6.1303 | -4.7257 |
| 58 | H | -1.4978 | -6.0259 | -3.0553 |
| 59 | H | -1.3732 | -4.5667 | -4.0529 |
| 60 | C | 6.0741  | -3.5605 | 1.7165  |
| 61 | H | 6.1382  | -4.6296 | 1.4810  |
| 62 | H | 6.2325  | -3.4315 | 2.7919  |
| 63 | H | 5.0523  | -3.2413 | 1.4689  |
| 64 | C | 7.9318  | -2.1258 | -2.7620 |
| 65 | H | 8.1445  | -3.1341 | -3.1367 |
| 66 | H | 6.9349  | -1.8510 | -3.1279 |
| 67 | H | 8.6591  | -1.4360 | -3.2015 |
| 68 | C | 9.7091  | -0.0514 | 1.4985  |
| 69 | H | 10.5337 | -0.5693 | 2.0073  |
| 70 | H | 10.1522 | 0.6600  | 0.7935  |
| 71 | H | 9.1709  | 0.5198  | 2.2644  |
| 72 | C | 5.2729  | 1.2684  | 1.5130  |
| 73 | H | 4.3946  | 1.8566  | 1.8040  |
| 74 | H | 5.0321  | 0.2151  | 1.7041  |
| 75 | H | 6.1061  | 1.5503  | 2.1644  |
| 76 | C | 4.0524  | 0.8630  | -3.3745 |
| 77 | H | 3.1056  | 1.4052  | -3.2631 |
| 78 | H | 4.4465  | 1.0550  | -4.3774 |
| 79 | H | 3.8183  | -0.2069 | -3.2856 |
| 80 | C | 8.6918  | 2.3840  | -2.0461 |
| 81 | H | 8.7184  | 3.4485  | -2.3172 |
| 82 | H | 9.3996  | 2.2386  | -1.2229 |
| 83 | H | 9.0566  | 1.8223  | -2.9138 |
| 84 | C | 0.0138  | -1.1846 | -2.4484 |
| 85 | H | -0.1560 | -0.1070 | -2.3381 |
| 86 | H | 1.0137  | -1.3089 | -2.8829 |
| 87 | H | -0.7193 | -1.5766 | -3.1603 |
| 88 | C | 1.7427  | -1.9056 | 2.2422  |
| 89 | H | 1.6577  | -0.8506 | 2.5292  |
| 90 | H | 1.5849  | -2.5213 | 3.1333  |
| 91 | H | 2.7710  | -2.0565 | 1.8869  |
| 92 | C | -1.8689 | -4.9270 | 0.3949  |
| 93 | H | -2.5925 | -4.7644 | 1.2044  |
| 94 | H | -2.4334 | -5.1299 | -0.5212 |
| 95 | H | -1.3044 | -5.8324 | 0.6510  |

large\_basis\_B-4-Br\_transNiBrPhIMes2\_bb  
Energy (POTENTIAL) = -2263.36317372 Eh

|    | Atom | X       | Y       | Z       |
|----|------|---------|---------|---------|
| 1  | C    | -0.5590 | 1.5191  | 0.1476  |
| 2  | C    | 0.5459  | 2.2924  | 0.1719  |
| 3  | C    | 1.2304  | 0.1494  | -0.2639 |
| 4  | N    | -0.1353 | 0.2153  | -0.1030 |
| 5  | N    | 1.6279  | 1.4504  | -0.0806 |
| 6  | Ni   | 2.3274  | -1.4388 | -0.6368 |
| 7  | C    | 3.3608  | -3.0887 | -0.9459 |
| 8  | N    | 4.6820  | -3.3461 | -0.6829 |
| 9  | N    | 2.8651  | -4.3209 | -1.2889 |
| 10 | C    | 4.9839  | -4.6993 | -0.8307 |
| 11 | C    | 3.8419  | -5.3110 | -1.2160 |
| 12 | H    | 5.9789  | -5.0778 | -0.6557 |
| 13 | H    | 3.6219  | -6.3411 | -1.4490 |
| 14 | H    | -1.6012 | 1.7561  | 0.2907  |
| 15 | H    | 0.6798  | 3.3484  | 0.3456  |
| 16 | C    | 1.5504  | -4.6045 | -1.8045 |
| 17 | C    | 0.5952  | -5.2320 | -0.9929 |
| 18 | C    | 1.3127  | -4.3554 | -3.1713 |
| 19 | C    | -0.6607 | -5.5025 | -1.5547 |
| 20 | C    | 0.0461  | -4.6431 | -3.6827 |
| 21 | C    | -0.9607 | -5.2023 | -2.8838 |
| 22 | H    | -1.4203 | -5.9642 | -0.9277 |
| 23 | H    | -0.1560 | -4.4397 | -4.7324 |
| 24 | C    | 5.7267  | -2.3772 | -0.4636 |
| 25 | C    | 6.5058  | -1.9969 | -1.5720 |
| 26 | C    | 5.9829  | -1.8936 | 0.8256  |
| 27 | C    | 7.5233  | -1.0632 | -1.3676 |
| 28 | C    | 7.0000  | -0.9401 | 0.9751  |
| 29 | C    | 7.7734  | -0.5087 | -0.1058 |
| 30 | H    | 8.1222  | -0.7444 | -2.2181 |
| 31 | H    | 7.1986  | -0.5408 | 1.9670  |
| 32 | C    | -1.0882 | -0.8661 | -0.0240 |
| 33 | C    | -1.4590 | -1.5671 | -1.1779 |
| 34 | C    | -1.6857 | -1.1330 | 1.2225  |
| 35 | C    | -2.4331 | -2.5644 | -1.0638 |
| 36 | C    | -2.6502 | -2.1430 | 1.2869  |
| 37 | C    | -3.0312 | -2.8775 | 0.1584  |
| 38 | H    | -2.7238 | -3.1109 | -1.9563 |
| 39 | H    | -3.1072 | -2.3671 | 2.2486  |
| 40 | C    | 2.9659  | 1.9849  | -0.0703 |
| 41 | C    | 3.8126  | 1.7114  | 1.0135  |
| 42 | C    | 3.3538  | 2.8342  | -1.1208 |
| 43 | C    | 5.0917  | 2.2826  | 1.0049  |
| 44 | C    | 4.6289  | 3.4012  | -1.0699 |
| 45 | C    | 5.5167  | 3.1301  | -0.0218 |
| 46 | H    | 5.7658  | 2.0641  | 1.8295  |
| 47 | H    | 4.9487  | 4.0464  | -1.8854 |
| 48 | C    | 2.4188  | -3.8808 | -4.0800 |
| 49 | H    | 2.9762  | -3.0481 | -3.6506 |
| 50 | H    | 3.1360  | -4.6926 | -4.2643 |
| 51 | H    | 2.0213  | -3.5611 | -5.0481 |

|     |   |         |         |         |
|-----|---|---------|---------|---------|
| 52  | C | 0.8968  | -5.7042 | 0.4064  |
| 53  | H | 1.1217  | -6.7803 | 0.3961  |
| 54  | H | 1.7404  | -5.1758 | 0.8482  |
| 55  | H | 0.0315  | -5.5541 | 1.0599  |
| 56  | C | -2.3253 | -5.4894 | -3.4621 |
| 57  | H | -2.2786 | -6.2871 | -4.2153 |
| 58  | H | -3.0326 | -5.8026 | -2.6872 |
| 59  | H | -2.7394 | -4.6052 | -3.9621 |
| 60  | C | 5.2370  | -2.4189 | 2.0226  |
| 61  | H | 5.5027  | -3.4687 | 2.2096  |
| 62  | H | 5.4856  | -1.8466 | 2.9219  |
| 63  | H | 4.1542  | -2.3892 | 1.8775  |
| 64  | C | 6.2245  | -2.5450 | -2.9485 |
| 65  | H | 6.3839  | -3.6291 | -2.9955 |
| 66  | H | 5.1853  | -2.3548 | -3.2352 |
| 67  | H | 6.8718  | -2.0736 | -3.6935 |
| 68  | C | 8.8653  | 0.5191  | 0.0701  |
| 69  | H | 9.8481  | 0.1007  | -0.1830 |
| 70  | H | 8.7048  | 1.3810  | -0.5884 |
| 71  | H | 8.9126  | 0.8856  | 1.1007  |
| 72  | C | 3.3725  | 0.8398  | 2.1592  |
| 73  | H | 2.4613  | 1.2328  | 2.6284  |
| 74  | H | 3.1341  | -0.1744 | 1.8284  |
| 75  | H | 4.1517  | 0.7829  | 2.9254  |
| 76  | C | 2.4512  | 3.0743  | -2.3043 |
| 77  | H | 1.5679  | 3.6670  | -2.0373 |
| 78  | H | 2.9854  | 3.6071  | -3.0961 |
| 79  | H | 2.0947  | 2.1229  | -2.7134 |
| 80  | C | 6.8901  | 3.7573  | -0.0010 |
| 81  | H | 6.8286  | 4.8363  | 0.1954  |
| 82  | H | 7.5236  | 3.3146  | 0.7737  |
| 83  | H | 7.3979  | 3.6379  | -0.9658 |
| 84  | C | -0.7995 | -1.3083 | -2.5026 |
| 85  | H | -0.5693 | -0.2493 | -2.6532 |
| 86  | H | 0.1444  | -1.8585 | -2.5427 |
| 87  | H | -1.4255 | -1.6546 | -3.3312 |
| 88  | C | -1.3101 | -0.3722 | 2.4705  |
| 89  | H | -1.8082 | 0.6047  | 2.5183  |
| 90  | H | -1.6043 | -0.9353 | 3.3620  |
| 91  | H | -0.2310 | -0.2048 | 2.5182  |
| 92  | C | -4.0306 | -4.0046 | 0.2590  |
| 93  | H | -4.7227 | -3.8603 | 1.0962  |
| 94  | H | -4.6207 | -4.1025 | -0.6593 |
| 95  | H | -3.5198 | -4.9639 | 0.4203  |
| 96  | C | 3.0682  | -0.5983 | -2.2010 |
| 97  | C | 2.4879  | -0.5995 | -3.4852 |
| 98  | C | 4.3006  | 0.0697  | -2.0847 |
| 99  | C | 3.0996  | 0.0141  | -4.5861 |
| 100 | H | 1.5441  | -1.1039 | -3.6518 |
| 101 | C | 4.9254  | 0.6822  | -3.1755 |
| 102 | H | 4.7913  | 0.1224  | -1.1204 |
| 103 | C | 4.3292  | 0.6604  | -4.4380 |
| 104 | H | 2.6119  | -0.0178 | -5.5592 |
| 105 | H | 5.8810  | 1.1813  | -3.0298 |
| 106 | H | 4.8115  | 1.1376  | -5.2884 |

107

Br

1.5457

-2.4354

1.5223

large\_basis\_D-6-Cl\_NiClIPhen2\_bb  
 Energy (POTENTIAL) = -2006.71966450 Eh

|    | Atom | X       | Y       | Z       |
|----|------|---------|---------|---------|
| 1  | C    | 0.0556  | 0.0766  | 0.1182  |
| 2  | C    | 1.1240  | 0.7710  | -0.3398 |
| 3  | C    | 1.6297  | -1.4553 | -0.5184 |
| 4  | N    | 0.3727  | -1.2754 | -0.0088 |
| 5  | N    | 2.0659  | -0.1752 | -0.7386 |
| 6  | Ni   | 2.6996  | -3.0886 | -0.6799 |
| 7  | C    | 3.8087  | -4.5341 | -1.4014 |
| 8  | N    | 5.1017  | -4.8756 | -1.1094 |
| 9  | N    | 3.3968  | -5.5421 | -2.2320 |
| 10 | C    | 5.4676  | -6.0765 | -1.7172 |
| 11 | C    | 4.3923  | -6.4979 | -2.4236 |
| 12 | H    | 6.4578  | -6.4927 | -1.6190 |
| 13 | H    | 4.2495  | -7.3582 | -3.0589 |
| 14 | H    | -0.9018 | 0.4104  | 0.4865  |
| 15 | H    | 1.2922  | 1.8312  | -0.4473 |
| 16 | C    | 2.0879  | -5.6177 | -2.7978 |
| 17 | C    | 1.3556  | -6.8029 | -2.6970 |
| 18 | C    | 1.5495  | -4.4990 | -3.4416 |
| 19 | C    | 0.0703  | -6.8636 | -3.2399 |
| 20 | C    | 0.2600  | -4.5654 | -3.9711 |
| 21 | C    | -0.4825 | -5.7461 | -3.8715 |
| 22 | H    | -0.5020 | -7.7832 | -3.1560 |
| 23 | H    | -0.1615 | -3.6942 | -4.4646 |
| 24 | C    | 5.9718  | -4.1141 | -0.2689 |
| 25 | C    | 5.9916  | -2.7198 | -0.3670 |
| 26 | C    | 6.8062  | -4.7741 | 0.6375  |
| 27 | C    | 6.8436  | -1.9847 | 0.4571  |
| 28 | C    | 7.6650  | -4.0299 | 1.4482  |
| 29 | C    | 7.6849  | -2.6354 | 1.3634  |
| 30 | H    | 6.8490  | -0.9013 | 0.3787  |
| 31 | H    | 8.3089  | -4.5440 | 2.1565  |
| 32 | C    | -0.5214 | -2.3364 | 0.3326  |
| 33 | C    | -0.6367 | -3.4418 | -0.5150 |
| 34 | C    | -1.2885 | -2.2492 | 1.4970  |
| 35 | C    | -1.5137 | -4.4737 | -0.1835 |
| 36 | C    | -2.1732 | -3.2816 | 1.8137  |
| 37 | C    | -2.2860 | -4.3966 | 0.9789  |
| 38 | H    | -1.5922 | -5.3336 | -0.8427 |
| 39 | H    | -2.7639 | -3.2176 | 2.7233  |
| 40 | C    | 3.3383  | 0.1398  | -1.3050 |
| 41 | C    | 4.1615  | 1.0852  | -0.6893 |
| 42 | C    | 3.7483  | -0.5118 | -2.4729 |
| 43 | C    | 5.4090  | 1.3743  | -1.2472 |
| 44 | C    | 5.0012  | -0.2252 | -3.0160 |
| 45 | C    | 5.8337  | 0.7178  | -2.4057 |
| 46 | H    | 6.0529  | 2.1055  | -0.7666 |
| 47 | H    | 5.3229  | -0.7367 | -3.9188 |
| 48 | Cl   | 2.6527  | -3.8034 | 1.6260  |
| 49 | H    | 6.8080  | 0.9402  | -2.8314 |
| 50 | H    | 8.3503  | -2.0601 | 2.0013  |
| 51 | H    | 6.7656  | -5.8555 | 0.7252  |

|    |   |         |         |         |
|----|---|---------|---------|---------|
| 52 | H | 5.3429  | -2.2207 | -1.0766 |
| 53 | H | 3.8359  | 1.5696  | 0.2262  |
| 54 | H | 3.0876  | -1.2359 | -2.9391 |
| 55 | H | -1.1746 | -1.3969 | 2.1598  |
| 56 | H | -0.0397 | -3.4911 | -1.4177 |
| 57 | H | -2.9705 | -5.2009 | 1.2340  |
| 58 | H | -1.4855 | -5.7950 | -4.2859 |
| 59 | H | 2.1396  | -3.5914 | -3.5185 |
| 60 | H | 1.7804  | -7.6573 | -2.1791 |

large\_basis\_TS-B-5-6-Br\_NiMes2\_ossts\_PhBr\_t\_bb  
Energy (POTENTIAL) = -2263.26214208 Eh

|    | Atom | X       | Y       | Z       |
|----|------|---------|---------|---------|
| 1  | C    | -3.7678 | 3.3353  | 0.0322  |
| 2  | C    | -2.6772 | 4.0902  | -0.2432 |
| 3  | C    | -2.0410 | 1.8920  | -0.4108 |
| 4  | N    | -3.3676 | 2.0046  | -0.0721 |
| 5  | N    | -1.6385 | 3.1997  | -0.5096 |
| 6  | Ni   | -0.9671 | 0.3535  | -0.6419 |
| 7  | C    | 0.1454  | -1.1177 | -1.1102 |
| 8  | N    | 1.4134  | -1.4427 | -0.6902 |
| 9  | N    | -0.1521 | -2.1248 | -1.9918 |
| 10 | C    | 1.8776  | -2.6089 | -1.2935 |
| 11 | C    | 0.8901  | -3.0416 | -2.1145 |
| 12 | H    | 2.8561  | -3.0107 | -1.0814 |
| 13 | H    | 0.8247  | -3.8992 | -2.7661 |
| 14 | H    | -4.7796 | 3.6092  | 0.2872  |
| 15 | H    | -2.5360 | 5.1595  | -0.2785 |
| 16 | C    | -1.3961 | -2.2439 | -2.6994 |
| 17 | C    | -2.5008 | -2.8071 | -2.0443 |
| 18 | C    | -1.4542 | -1.8244 | -4.0393 |
| 19 | C    | -3.6764 | -2.9832 | -2.7830 |
| 20 | C    | -2.6548 | -2.0063 | -4.7310 |
| 21 | C    | -3.7727 | -2.5922 | -4.1219 |
| 22 | H    | -4.5394 | -3.4256 | -2.2922 |
| 23 | H    | -2.7208 | -1.6817 | -5.7676 |
| 24 | C    | 2.1735  | -0.6790 | 0.2602  |
| 25 | C    | 2.6897  | 0.5643  | -0.1272 |
| 26 | C    | 2.3678  | -1.1978 | 1.5521  |
| 27 | C    | 3.3775  | 1.3170  | 0.8334  |
| 28 | C    | 3.0663  | -0.4144 | 2.4731  |
| 29 | C    | 3.5633  | 0.8516  | 2.1379  |
| 30 | H    | 3.7694  | 2.2908  | 0.5514  |
| 31 | H    | 3.1996  | -0.7881 | 3.4859  |
| 32 | C    | -4.2592 | 0.8963  | 0.1213  |
| 33 | C    | -4.6837 | 0.1627  | -0.9998 |
| 34 | C    | -4.7149 | 0.6056  | 1.4169  |
| 35 | C    | -5.5752 | -0.8933 | -0.7911 |
| 36 | C    | -5.6022 | -0.4661 | 1.5747  |
| 37 | C    | -6.0376 | -1.2297 | 0.4869  |
| 38 | H    | -5.9176 | -1.4655 | -1.6496 |
| 39 | H    | -5.9571 | -0.7089 | 2.5741  |
| 40 | C    | -0.3223 | 3.6290  | -0.8936 |
| 41 | C    | 0.6330  | 3.8851  | 0.1037  |
| 42 | C    | -0.0507 | 3.8241  | -2.2555 |
| 43 | C    | 1.8755  | 4.3842  | -0.2971 |
| 44 | C    | 1.2102  | 4.3190  | -2.6095 |
| 45 | C    | 2.1790  | 4.6155  | -1.6453 |
| 46 | H    | 2.6277  | 4.5893  | 0.4615  |
| 47 | H    | 1.4384  | 4.4725  | -3.6619 |
| 48 | C    | -0.2596 | -1.1742 | -4.6919 |
| 49 | H    | 0.0825  | -0.3132 | -4.1044 |
| 50 | H    | 0.5894  | -1.8646 | -4.7668 |
| 51 | H    | -0.5042 | -0.8279 | -5.7008 |

|     |    |         |         |         |
|-----|----|---------|---------|---------|
| 52  | C  | -2.4354 | -3.1572 | -0.5806 |
| 53  | H  | -1.5886 | -3.8175 | -0.3564 |
| 54  | H  | -2.2946 | -2.2456 | 0.0149  |
| 55  | H  | -3.3547 | -3.6511 | -0.2518 |
| 56  | C  | -5.0675 | -2.7446 | -4.8838 |
| 57  | H  | -4.9011 | -3.1690 | -5.8812 |
| 58  | H  | -5.7733 | -3.3913 | -4.3519 |
| 59  | H  | -5.5545 | -1.7705 | -5.0273 |
| 60  | C  | 1.8222  | -2.5474 | 1.9455  |
| 61  | H  | 2.4024  | -3.3652 | 1.4982  |
| 62  | H  | 1.8450  | -2.6726 | 3.0314  |
| 63  | H  | 0.7859  | -2.6594 | 1.6134  |
| 64  | C  | 2.4894  | 1.0945  | -1.5236 |
| 65  | H  | 2.6703  | 0.3203  | -2.2785 |
| 66  | H  | 1.4572  | 1.4394  | -1.6558 |
| 67  | H  | 3.1586  | 1.9350  | -1.7226 |
| 68  | C  | 4.2754  | 1.6868  | 3.1754  |
| 69  | H  | 5.1767  | 1.1823  | 3.5472  |
| 70  | H  | 4.5775  | 2.6596  | 2.7728  |
| 71  | H  | 3.6290  | 1.8666  | 4.0440  |
| 72  | C  | 0.3286  | 3.5951  | 1.5509  |
| 73  | H  | -0.5414 | 4.1634  | 1.9029  |
| 74  | H  | 0.0916  | 2.5332  | 1.6855  |
| 75  | H  | 1.1821  | 3.8435  | 2.1892  |
| 76  | C  | -1.0777 | 3.4658  | -3.2998 |
| 77  | H  | -2.0242 | 3.9960  | -3.1395 |
| 78  | H  | -0.7177 | 3.7039  | -4.3054 |
| 79  | H  | -1.3034 | 2.3925  | -3.2576 |
| 80  | C  | 3.5353  | 5.1510  | -2.0384 |
| 81  | H  | 3.6553  | 5.1862  | -3.1261 |
| 82  | H  | 3.6903  | 6.1662  | -1.6505 |
| 83  | H  | 4.3418  | 4.5286  | -1.6308 |
| 84  | C  | -4.1852 | 0.4883  | -2.3843 |
| 85  | H  | -4.1807 | 1.5684  | -2.5698 |
| 86  | H  | -3.1540 | 0.1356  | -2.5066 |
| 87  | H  | -4.8039 | 0.0062  | -3.1458 |
| 88  | C  | -4.2759 | 1.4256  | 2.6045  |
| 89  | H  | -4.7874 | 2.3966  | 2.6343  |
| 90  | H  | -4.5007 | 0.9035  | 3.5399  |
| 91  | H  | -3.1995 | 1.6164  | 2.5712  |
| 92  | C  | -6.9734 | -2.4004 | 0.6752  |
| 93  | H  | -7.4444 | -2.3870 | 1.6637  |
| 94  | H  | -7.7675 | -2.4026 | -0.0812 |
| 95  | H  | -6.4358 | -3.3535 | 0.5786  |
| 96  | Br | -0.9439 | -0.1569 | 1.9382  |
| 97  | C  | -0.3732 | -0.4884 | 4.0078  |
| 98  | C  | -0.5254 | -1.7396 | 4.6027  |
| 99  | C  | 0.3212  | 0.5292  | 4.6613  |
| 100 | C  | 0.0208  | -1.9736 | 5.8721  |
| 101 | H  | -1.0536 | -2.5358 | 4.0812  |
| 102 | C  | 0.8643  | 0.2950  | 5.9306  |
| 103 | H  | 0.4521  | 1.4959  | 4.1784  |
| 104 | C  | 0.7172  | -0.9580 | 6.5359  |
| 105 | H  | -0.0957 | -2.9490 | 6.3410  |
| 106 | H  | 1.4055  | 1.0880  | 6.4438  |



107

H

1.1439

-1.1424

7.5188

large\_basis\_B-4-I\_transNiIPhIMes2\_bb  
 Energy (POTENTIAL) = -2261.57557418 Eh

|    | Atom | X       | Y       | Z       |
|----|------|---------|---------|---------|
| 1  | C    | -0.1132 | 0.0467  | -0.3154 |
| 2  | C    | 1.0000  | 0.8015  | -0.2276 |
| 3  | C    | 1.6761  | -1.3559 | -0.6067 |
| 4  | N    | 0.3023  | -1.2662 | -0.5295 |
| 5  | N    | 2.0823  | -0.0579 | -0.4077 |
| 6  | Ni   | 2.7755  | -2.9514 | -0.9592 |
| 7  | C    | 3.8275  | -4.5992 | -1.2858 |
| 8  | N    | 5.1681  | -4.8304 | -1.0969 |
| 9  | N    | 3.3473  | -5.8417 | -1.6259 |
| 10 | C    | 5.4964  | -6.1703 | -1.2926 |
| 11 | C    | 4.3531  | -6.8039 | -1.6312 |
| 12 | H    | 6.5082  | -6.5258 | -1.1760 |
| 13 | H    | 4.1476  | -7.8352 | -1.8716 |
| 14 | H    | -1.1578 | 0.3010  | -0.2342 |
| 15 | H    | 1.1392  | 1.8556  | -0.0486 |
| 16 | C    | 2.0038  | -6.1833 | -2.0188 |
| 17 | C    | 1.1969  | -6.9386 | -1.1497 |
| 18 | C    | 1.5887  | -5.8724 | -3.3251 |
| 19 | C    | -0.0953 | -7.2647 | -1.5762 |
| 20 | C    | 0.2894  | -6.2232 | -3.7049 |
| 21 | C    | -0.5732 | -6.9029 | -2.8388 |
| 22 | H    | -0.7384 | -7.8278 | -0.9030 |
| 23 | H    | -0.0496 | -5.9707 | -4.7073 |
| 24 | C    | 6.2106  | -3.8588 | -0.8790 |
| 25 | C    | 6.9711  | -3.4595 | -1.9934 |
| 26 | C    | 6.4919  | -3.4025 | 0.4147  |
| 27 | C    | 7.9952  | -2.5334 | -1.7886 |
| 28 | C    | 7.5098  | -2.4497 | 0.5641  |
| 29 | C    | 8.2654  | -1.9998 | -0.5219 |
| 30 | H    | 8.5787  | -2.1988 | -2.6436 |
| 31 | H    | 7.7257  | -2.0691 | 1.5596  |
| 32 | C    | -0.6838 | -2.3214 | -0.4854 |
| 33 | C    | -1.0009 | -3.0440 | -1.6437 |
| 34 | C    | -1.3839 | -2.5236 | 0.7195  |
| 35 | C    | -2.0234 | -3.9953 | -1.5757 |
| 36 | C    | -2.3945 | -3.4897 | 0.7390  |
| 37 | C    | -2.7252 | -4.2417 | -0.3930 |
| 38 | H    | -2.2740 | -4.5547 | -2.4725 |
| 39 | H    | -2.9316 | -3.6621 | 1.6693  |
| 40 | C    | 3.4207  | 0.4725  | -0.3344 |
| 41 | C    | 4.2407  | 0.1563  | 0.7578  |
| 42 | C    | 3.8377  | 1.3637  | -1.3402 |
| 43 | C    | 5.5191  | 0.7280  | 0.8062  |
| 44 | C    | 5.1105  | 1.9265  | -1.2333 |
| 45 | C    | 5.9715  | 1.6138  | -0.1742 |
| 46 | H    | 6.1716  | 0.4734  | 1.6379  |
| 47 | H    | 5.4527  | 2.6006  | -2.0157 |
| 48 | C    | 2.5391  | -5.2800 | -4.3348 |
| 49 | H    | 3.2094  | -4.5410 | -3.8972 |
| 50 | H    | 3.1656  | -6.0719 | -4.7690 |
| 51 | H    | 1.9948  | -4.8041 | -5.1562 |

|     |   |         |         |         |
|-----|---|---------|---------|---------|
| 52  | C | 1.7058  | -7.5004 | 0.1558  |
| 53  | H | 2.0280  | -8.5412 | 0.0103  |
| 54  | H | 2.5504  | -6.9390 | 0.5553  |
| 55  | H | 0.9154  | -7.5045 | 0.9125  |
| 56  | C | -1.9687 | -7.2834 | -3.2721 |
| 57  | H | -1.9977 | -8.3173 | -3.6425 |
| 58  | H | -2.6774 | -7.2183 | -2.4396 |
| 59  | H | -2.3298 | -6.6379 | -4.0802 |
| 60  | C | 5.7821  | -3.9623 | 1.6184  |
| 61  | H | 6.1287  | -4.9842 | 1.8255  |
| 62  | H | 5.9781  | -3.3564 | 2.5083  |
| 63  | H | 4.7020  | -4.0184 | 1.4722  |
| 64  | C | 6.6578  | -3.9745 | -3.3757 |
| 65  | H | 6.8476  | -5.0513 | -3.4627 |
| 66  | H | 5.6034  | -3.8071 | -3.6201 |
| 67  | H | 7.2651  | -3.4625 | -4.1273 |
| 68  | C | 9.3556  | -0.9699 | -0.3477 |
| 69  | H | 10.3316 | -1.3694 | -0.6520 |
| 70  | H | 9.1642  | -0.0857 | -0.9676 |
| 71  | H | 9.4369  | -0.6400 | 0.6930  |
| 72  | C | 3.8004  | -0.7975 | 1.8334  |
| 73  | H | 2.7581  | -0.6338 | 2.1259  |
| 74  | H | 3.8636  | -1.8299 | 1.4797  |
| 75  | H | 4.4303  | -0.7014 | 2.7234  |
| 76  | C | 2.9742  | 1.6490  | -2.5435 |
| 77  | H | 2.1166  | 2.2865  | -2.2968 |
| 78  | H | 3.5534  | 2.1559  | -3.3204 |
| 79  | H | 2.5801  | 0.7182  | -2.9652 |
| 80  | C | 7.3465  | 2.2332  | -0.0977 |
| 81  | H | 7.2873  | 3.2973  | 0.1679  |
| 82  | H | 7.9706  | 1.7376  | 0.6525  |
| 83  | H | 7.8630  | 2.1737  | -1.0631 |
| 84  | C | -0.2516 | -2.8253 | -2.9251 |
| 85  | H | -0.0560 | -1.7642 | -3.1098 |
| 86  | H | 0.7149  | -3.3312 | -2.8650 |
| 87  | H | -0.7961 | -3.2385 | -3.7795 |
| 88  | C | -1.0876 | -1.7376 | 1.9754  |
| 89  | H | -1.6498 | -0.7951 | 2.0027  |
| 90  | H | -1.3743 | -2.3164 | 2.8592  |
| 91  | H | -0.0263 | -1.4937 | 2.0646  |
| 92  | C | -3.7884 | -5.3115 | -0.3298 |
| 93  | H | -4.5622 | -5.0685 | 0.4072  |
| 94  | H | -4.2742 | -5.4545 | -1.3012 |
| 95  | H | -3.3520 | -6.2756 | -0.0362 |
| 96  | I | 1.8481  | -4.0670 | 1.3706  |
| 97  | C | 3.5580  | -2.0642 | -2.4810 |
| 98  | C | 3.0013  | -2.0140 | -3.7745 |
| 99  | C | 4.7849  | -1.3997 | -2.3144 |
| 100 | C | 3.6371  | -1.3649 | -4.8403 |
| 101 | H | 2.0557  | -2.4971 | -3.9783 |
| 102 | C | 5.4310  | -0.7479 | -3.3701 |
| 103 | H | 5.2560  | -1.3781 | -1.3401 |
| 104 | C | 4.8641  | -0.7271 | -4.6450 |
| 105 | H | 3.1669  | -1.3596 | -5.8224 |
| 106 | H | 6.3817  | -0.2531 | -3.1851 |

107

H

5.3646

-0.2211

-5.4676

large\_basis\_A-1\_NiITMe2\_bb

Energy (POTENTIAL) = -936.542798241 Eh

|    | Atom | X       | Y       | Z       |
|----|------|---------|---------|---------|
| 1  | C    | -0.7942 | 2.1848  | 0.7712  |
| 2  | C    | 0.4851  | 2.1643  | 0.2953  |
| 3  | C    | -0.1566 | 4.3710  | 0.4338  |
| 4  | N    | -1.1609 | 3.5286  | 0.8478  |
| 5  | N    | 0.8493  | 3.4964  | 0.0974  |
| 6  | C    | -2.4602 | 3.9870  | 1.3106  |
| 7  | H    | -2.4543 | 5.0791  | 1.2839  |
| 8  | H    | -3.2589 | 3.6122  | 0.6610  |
| 9  | H    | -2.6475 | 3.6489  | 2.3357  |
| 10 | C    | 2.1457  | 3.9135  | -0.4108 |
| 11 | H    | 2.3202  | 3.5029  | -1.4114 |
| 12 | H    | 2.1457  | 5.0047  | -0.4604 |
| 13 | H    | 2.9495  | 3.5806  | 0.2549  |
| 14 | C    | 1.4069  | 1.0290  | 0.0024  |
| 15 | H    | 1.6986  | 1.0050  | -1.0558 |
| 16 | H    | 2.3310  | 1.0932  | 0.5916  |
| 17 | H    | 0.9262  | 0.0752  | 0.2380  |
| 18 | C    | -1.7117 | 1.0780  | 1.1683  |
| 19 | H    | -1.2225 | 0.1092  | 1.0326  |
| 20 | H    | -2.0117 | 1.1573  | 2.2215  |
| 21 | H    | -2.6315 | 1.0755  | 0.5688  |
| 22 | Ni   | -0.1587 | 6.2415  | 0.3380  |
| 23 | C    | -0.1717 | 8.1097  | 0.2216  |
| 24 | N    | 0.1851  | 8.9030  | -0.8429 |
| 25 | N    | -0.5563 | 9.0311  | 1.1667  |
| 26 | C    | 0.0252  | 10.2619 | -0.5719 |
| 27 | C    | 0.6700  | 8.3837  | -2.1108 |
| 28 | C    | -0.4448 | 10.3435 | 0.7071  |
| 29 | C    | -1.0256 | 8.6773  | 2.4961  |
| 30 | C    | 0.3422  | 11.3213 | -1.5730 |
| 31 | H    | 0.7028  | 7.2948  | -2.0315 |
| 32 | H    | -0.0004 | 8.6669  | -2.9296 |
| 33 | H    | 1.6748  | 8.7638  | -2.3260 |
| 34 | C    | -0.8143 | 11.5210 | 1.5448  |
| 35 | H    | -1.0320 | 7.5872  | 2.5654  |
| 36 | H    | -0.3600 | 9.0857  | 3.2646  |
| 37 | H    | -2.0384 | 9.0597  | 2.6637  |
| 38 | H    | 0.1284  | 12.3123 | -1.1626 |
| 39 | H    | 1.4002  | 11.3007 | -1.8659 |
| 40 | H    | -0.2498 | 11.2026 | -2.4900 |
| 41 | H    | -1.8740 | 11.4982 | 1.8314  |
| 42 | H    | -0.2282 | 11.5618 | 2.4722  |
| 43 | H    | -0.6372 | 12.4509 | 0.9969  |

large\_basis\_TS-B-5-6-Cl\_NiMes2\_ossts\_PhCl\_t\_oss\_bb  
Energy (POTENTIAL) = -2710.32684219 Eh

|    | Atom | X       | Y       | Z       |
|----|------|---------|---------|---------|
| 1  | C    | -0.5099 | 1.0261  | 0.0647  |
| 2  | C    | 0.5237  | 1.8105  | -0.3262 |
| 3  | C    | 1.2463  | -0.3637 | -0.4250 |
| 4  | N    | -0.0564 | -0.2896 | 0.0016  |
| 5  | N    | 1.5808  | 0.9512  | -0.6206 |
| 6  | Ni   | 2.3399  | -1.8916 | -0.6853 |
| 7  | C    | 3.4367  | -3.3434 | -1.2191 |
| 8  | N    | 4.7224  | -3.6484 | -0.8444 |
| 9  | N    | 3.1149  | -4.3657 | -2.0730 |
| 10 | C    | 5.1757  | -4.8199 | -1.4471 |
| 11 | C    | 4.1612  | -5.2745 | -2.2219 |
| 12 | H    | 6.1670  | -5.2070 | -1.2695 |
| 13 | H    | 4.0780  | -6.1433 | -2.8564 |
| 14 | H    | -1.5144 | 1.2699  | 0.3743  |
| 15 | H    | 0.6126  | 2.8816  | -0.4234 |
| 16 | C    | 1.8393  | -4.5201 | -2.7145 |
| 17 | C    | 0.7954  | -5.1374 | -2.0069 |
| 18 | C    | 1.6904  | -4.0878 | -4.0412 |
| 19 | C    | -0.4095 | -5.3545 | -2.6817 |
| 20 | C    | 0.4597  | -4.3116 | -4.6689 |
| 21 | C    | -0.5960 | -4.9509 | -4.0089 |
| 22 | H    | -1.2251 | -5.8423 | -2.1534 |
| 23 | H    | 0.3252  | -3.9802 | -5.6963 |
| 24 | C    | 5.5124  | -2.8580 | 0.0578  |
| 25 | C    | 6.0318  | -1.6326 | -0.3889 |
| 26 | C    | 5.7604  | -3.3455 | 1.3508  |
| 27 | C    | 6.7943  | -0.8782 | 0.5091  |
| 28 | C    | 6.5296  | -2.5547 | 2.2120  |
| 29 | C    | 7.0446  | -1.3156 | 1.8145  |
| 30 | H    | 7.2000  | 0.0744  | 0.1779  |
| 31 | H    | 6.7238  | -2.9150 | 3.2199  |
| 32 | C    | -0.8612 | -1.4297 | 0.3396  |
| 33 | C    | -1.3564 | -2.2413 | -0.6926 |
| 34 | C    | -1.1433 | -1.6866 | 1.6914  |
| 35 | C    | -2.1371 | -3.3474 | -0.3383 |
| 36 | C    | -1.9287 | -2.8037 | 1.9950  |
| 37 | C    | -2.4254 | -3.6504 | 0.9966  |
| 38 | H    | -2.5257 | -3.9860 | -1.1275 |
| 39 | H    | -2.1515 | -3.0202 | 3.0377  |
| 40 | C    | 2.8808  | 1.4055  | -1.0295 |
| 41 | C    | 3.8797  | 1.5565  | -0.0558 |
| 42 | C    | 3.0986  | 1.7199  | -2.3804 |
| 43 | C    | 5.1163  | 2.0676  | -0.4639 |
| 44 | C    | 4.3552  | 2.2154  | -2.7428 |
| 45 | C    | 5.3719  | 2.4033  | -1.7979 |
| 46 | H    | 5.8996  | 2.1972  | 0.2788  |
| 47 | H    | 4.5434  | 2.4605  | -3.7860 |
| 48 | C    | 2.8163  | -3.3777 | -4.7511 |
| 49 | H    | 3.0777  | -2.4482 | -4.2293 |
| 50 | H    | 3.7268  | -3.9879 | -4.7853 |
| 51 | H    | 2.5359  | -3.1260 | -5.7786 |

|     |   |         |         |         |
|-----|---|---------|---------|---------|
| 52  | C | 0.9598  | -5.5021 | -0.5547 |
| 53  | H | 1.8604  | -6.1045 | -0.3844 |
| 54  | H | 1.0665  | -4.5921 | 0.0485  |
| 55  | H | 0.0944  | -6.0627 | -0.1888 |
| 56  | C | -1.9304 | -5.1498 | -4.6869 |
| 57  | H | -2.4088 | -6.0821 | -4.3662 |
| 58  | H | -2.6194 | -4.3306 | -4.4375 |
| 59  | H | -1.8320 | -5.1719 | -5.7777 |
| 60  | C | 5.2075  | -4.6725 | 1.8076  |
| 61  | H | 5.7250  | -5.5132 | 1.3279  |
| 62  | H | 5.3169  | -4.7869 | 2.8900  |
| 63  | H | 4.1446  | -4.7550 | 1.5625  |
| 64  | C | 5.7571  | -1.1288 | -1.7822 |
| 65  | H | 5.8971  | -1.9165 | -2.5317 |
| 66  | H | 4.7177  | -0.7883 | -1.8626 |
| 67  | H | 6.4125  | -0.2904 | -2.0315 |
| 68  | C | 7.8253  | -0.4539 | 2.7784  |
| 69  | H | 7.1715  | 0.2879  | 3.2573  |
| 70  | H | 8.2801  | -1.0510 | 3.5763  |
| 71  | H | 8.6225  | 0.0998  | 2.2688  |
| 72  | C | 3.6308  | 1.1414  | 1.3710  |
| 73  | H | 2.7454  | 1.6378  | 1.7874  |
| 74  | H | 3.4452  | 0.0618  | 1.4240  |
| 75  | H | 4.4893  | 1.3788  | 2.0061  |
| 76  | C | 2.0139  | 1.5005  | -3.4056 |
| 77  | H | 1.1163  | 2.0896  | -3.1811 |
| 78  | H | 2.3588  | 1.7756  | -4.4070 |
| 79  | H | 1.7055  | 0.4477  | -3.4250 |
| 80  | C | 6.7335  | 2.9007  | -2.2207 |
| 81  | H | 6.6615  | 3.6509  | -3.0166 |
| 82  | H | 7.2786  | 3.3448  | -1.3807 |
| 83  | H | 7.3471  | 2.0761  | -2.6097 |
| 84  | C | -1.0339 | -1.9541 | -2.1361 |
| 85  | H | -1.1239 | -0.8866 | -2.3672 |
| 86  | H | 0.0004  | -2.2466 | -2.3562 |
| 87  | H | -1.6963 | -2.5114 | -2.8035 |
| 88  | C | -0.6070 | -0.7966 | 2.7845  |
| 89  | H | -1.0963 | 0.1857  | 2.7836  |
| 90  | H | -0.7662 | -1.2493 | 3.7675  |
| 91  | H | 0.4669  | -0.6313 | 2.6567  |
| 92  | C | -3.2268 | -4.8795 | 1.3537  |
| 93  | H | -2.5689 | -5.7487 | 1.4905  |
| 94  | H | -3.7802 | -4.7423 | 2.2894  |
| 95  | H | -3.9440 | -5.1357 | 0.5658  |
| 96  | C | 2.2979  | -3.1134 | 3.7016  |
| 97  | C | 1.1611  | -3.7110 | 4.2313  |
| 98  | C | 3.4232  | -2.8626 | 4.4768  |
| 99  | C | 1.1519  | -4.0709 | 5.5861  |
| 100 | H | 0.2918  | -3.8940 | 3.6020  |
| 101 | C | 3.4105  | -3.2255 | 5.8306  |
| 102 | H | 4.3012  | -2.3953 | 4.0347  |
| 103 | C | 2.2754  | -3.8282 | 6.3846  |
| 104 | H | 0.2693  | -4.5398 | 6.0178  |
| 105 | H | 4.2846  | -3.0372 | 6.4516  |
| 106 | H | 2.2664  | -4.1082 | 7.4350  |

107

C1

2.3141

-2.5660

1.7064



large\_basis\_B-5-I\_NiIMes2\_IPh\_bb  
 Energy (POTENTIAL) = -2261.50773286 Eh

|    | Atom | X       | Y       | Z       |
|----|------|---------|---------|---------|
| 1  | C    | -0.3880 | 0.2257  | -0.0064 |
| 2  | C    | 0.7325  | 0.9663  | -0.1811 |
| 3  | C    | 1.2991  | -1.2231 | -0.5817 |
| 4  | N    | -0.0308 | -1.0981 | -0.2486 |
| 5  | N    | 1.7468  | 0.0741  | -0.5244 |
| 6  | Ni   | 2.2832  | -2.7768 | -1.0021 |
| 7  | C    | 3.2588  | -4.3068 | -1.5119 |
| 8  | N    | 4.5992  | -4.5765 | -1.3512 |
| 9  | N    | 2.7983  | -5.4378 | -2.1409 |
| 10 | C    | 4.9494  | -5.8211 | -1.8678 |
| 11 | C    | 3.8136  | -6.3653 | -2.3669 |
| 12 | H    | 5.9627  | -6.1902 | -1.8307 |
| 13 | H    | 3.6257  | -7.3086 | -2.8564 |
| 14 | H    | -1.3950 | 0.5052  | 0.2621  |
| 15 | H    | 0.9104  | 2.0274  | -0.0975 |
| 16 | C    | 1.4411  | -5.6648 | -2.5503 |
| 17 | C    | 0.6221  | -6.4863 | -1.7603 |
| 18 | C    | 0.9969  | -5.1117 | -3.7611 |
| 19 | C    | -0.6649 | -6.7703 | -2.2287 |
| 20 | C    | -0.2994 | -5.4190 | -4.1859 |
| 21 | C    | -1.1392 | -6.2545 | -3.4398 |
| 22 | H    | -1.3147 | -7.4012 | -1.6263 |
| 23 | H    | -0.6622 | -4.9924 | -5.1186 |
| 24 | C    | 5.5453  | -3.6708 | -0.7635 |
| 25 | C    | 5.9616  | -2.5574 | -1.5157 |
| 26 | C    | 6.0626  | -3.9409 | 0.5122  |
| 27 | C    | 6.8916  | -1.6889 | -0.9421 |
| 28 | C    | 6.9798  | -3.0292 | 1.0520  |
| 29 | C    | 7.3969  | -1.8965 | 0.3479  |
| 30 | H    | 7.2237  | -0.8263 | -1.5123 |
| 31 | H    | 7.3754  | -3.2146 | 2.0486  |
| 32 | C    | -0.9656 | -2.1867 | -0.1997 |
| 33 | C    | -1.4248 | -2.7293 | -1.4133 |
| 34 | C    | -1.4357 | -2.6412 | 1.0419  |
| 35 | C    | -2.3484 | -3.7739 | -1.3568 |
| 36 | C    | -2.3465 | -3.7060 | 1.0464  |
| 37 | C    | -2.8077 | -4.2881 | -0.1374 |
| 38 | H    | -2.7140 | -4.2010 | -2.2860 |
| 39 | H    | -2.7056 | -4.0817 | 2.0024  |
| 40 | C    | 3.0867  | 0.5022  | -0.8135 |
| 41 | C    | 3.9444  | 0.8200  | 0.2518  |
| 42 | C    | 3.4750  | 0.6523  | -2.1535 |
| 43 | C    | 5.2123  | 1.3219  | -0.0574 |
| 44 | C    | 4.7560  | 1.1504  | -2.4133 |
| 45 | C    | 5.6321  | 1.5019  | -1.3804 |
| 46 | H    | 5.8915  | 1.5682  | 0.7559  |
| 47 | H    | 5.0756  | 1.2645  | -3.4467 |
| 48 | C    | 1.8864  | -4.1883 | -4.5539 |
| 49 | H    | 2.1736  | -3.3213 | -3.9449 |
| 50 | H    | 2.8177  | -4.6846 | -4.8553 |
| 51 | H    | 1.3798  | -3.8308 | -5.4556 |

|     |   |         |         |         |
|-----|---|---------|---------|---------|
| 52  | C | 1.1100  | -7.0210 | -0.4375 |
| 53  | H | 1.9978  | -7.6542 | -0.5562 |
| 54  | H | 1.3901  | -6.1982 | 0.2316  |
| 55  | H | 0.3325  | -7.6131 | 0.0549  |
| 56  | C | -2.5276 | -6.5870 | -3.9315 |
| 57  | H | -2.5093 | -7.4403 | -4.6235 |
| 58  | H | -3.1939 | -6.8514 | -3.1036 |
| 59  | H | -2.9734 | -5.7443 | -4.4721 |
| 60  | C | 5.6912  | -5.1857 | 1.2817  |
| 61  | H | 6.4097  | -5.9940 | 1.0865  |
| 62  | H | 5.6981  | -4.9918 | 2.3591  |
| 63  | H | 4.6988  | -5.5500 | 1.0106  |
| 64  | C | 5.4166  | -2.3131 | -2.8996 |
| 65  | H | 5.5222  | -3.2017 | -3.5344 |
| 66  | H | 4.3467  | -2.0801 | -2.8499 |
| 67  | H | 5.9313  | -1.4780 | -3.3828 |
| 68  | C | 8.3428  | -0.8971 | 0.9691  |
| 69  | H | 8.9518  | -1.3522 | 1.7580  |
| 70  | H | 9.0186  | -0.4636 | 0.2228  |
| 71  | H | 7.7849  | -0.0672 | 1.4238  |
| 72  | C | 3.5217  | 0.5956  | 1.6817  |
| 73  | H | 2.6283  | 1.1765  | 1.9412  |
| 74  | H | 3.2779  | -0.4602 | 1.8510  |
| 75  | H | 4.3228  | 0.8759  | 2.3726  |
| 76  | C | 2.5453  | 0.2540  | -3.2711 |
| 77  | H | 1.6003  | 0.8101  | -3.2283 |
| 78  | H | 3.0047  | 0.4295  | -4.2488 |
| 79  | H | 2.2884  | -0.8102 | -3.1905 |
| 80  | C | 7.0013  | 2.0630  | -1.6826 |
| 81  | H | 6.9868  | 3.1617  | -1.6883 |
| 82  | H | 7.7352  | 1.7539  | -0.9300 |
| 83  | H | 7.3621  | 1.7384  | -2.6649 |
| 84  | C | -0.9233 | -2.2025 | -2.7336 |
| 85  | H | -1.0261 | -1.1121 | -2.7970 |
| 86  | H | 0.1424  | -2.4315 | -2.8505 |
| 87  | H | -1.4687 | -2.6524 | -3.5679 |
| 88  | C | -1.0251 | -1.9911 | 2.3414  |
| 89  | H | -1.7362 | -1.2019 | 2.6227  |
| 90  | H | -1.0095 | -2.7246 | 3.1537  |
| 91  | H | -0.0337 | -1.5388 | 2.2760  |
| 92  | C | -3.7522 | -5.4656 | -0.1119 |
| 93  | H | -4.3270 | -5.5047 | 0.8199  |
| 94  | H | -4.4597 | -5.4331 | -0.9486 |
| 95  | H | -3.1966 | -6.4097 | -0.1934 |
| 96  | I | 2.3517  | -3.5327 | 1.7049  |
| 97  | C | 2.3914  | -4.1174 | 3.8794  |
| 98  | C | 2.8741  | -5.3729 | 4.2628  |
| 99  | C | 1.9291  | -3.2235 | 4.8510  |
| 100 | C | 2.8931  | -5.7328 | 5.6156  |
| 101 | H | 3.2363  | -6.0723 | 3.5121  |
| 102 | C | 1.9498  | -3.5855 | 6.2030  |
| 103 | H | 1.5516  | -2.2460 | 4.5581  |
| 104 | C | 2.4316  | -4.8403 | 6.5877  |
| 105 | H | 3.2690  | -6.7110 | 5.9087  |
| 106 | H | 1.5886  | -2.8864 | 6.9545  |

107

H

2.4470

-5.1207

7.6379

large\_basis\_COD\_COD\_bb

Energy (POTENTIAL) = -312.138936653 Eh

|    | Atom | X       | Y       | Z       |
|----|------|---------|---------|---------|
| 1  | C    | 3.0277  | 0.4876  | 0.0000  |
| 2  | C    | 3.9215  | -0.0010 | 1.1537  |
| 3  | C    | 0.8237  | 1.8349  | 1.5305  |
| 4  | C    | 3.6220  | 0.3692  | 2.5908  |
| 5  | C    | 1.2920  | 1.6038  | 2.9783  |
| 6  | C    | 2.6347  | 0.9711  | 3.2762  |
| 7  | H    | 3.0322  | 1.5842  | -0.0140 |
| 8  | H    | 4.9517  | 0.3290  | 0.9487  |
| 9  | H    | 1.5383  | 2.4978  | 1.0283  |
| 10 | H    | 0.5337  | 0.9963  | 3.4988  |
| 11 | H    | 3.4944  | 0.1619  | -0.9382 |
| 12 | H    | 3.9704  | -1.1015 | 1.1154  |
| 13 | H    | -0.1284 | 2.3787  | 1.5754  |
| 14 | H    | 4.4396  | 0.0251  | 3.2298  |
| 15 | H    | 1.2749  | 2.5737  | 3.4994  |
| 16 | H    | 2.8220  | 1.0107  | 4.3525  |
| 17 | C    | 1.6212  | -0.0442 | 0.0766  |
| 18 | H    | 1.4285  | -0.9977 | -0.4155 |
| 19 | C    | 0.6399  | 0.5562  | 0.7576  |
| 20 | H    | -0.3414 | 0.0845  | 0.8136  |

large\_basis\_A-6-Cl\_NiClITMe2\_bb  
Energy (POTENTIAL) = -1396.87288804 Eh

|    | Atom | X       | Y       | Z       |
|----|------|---------|---------|---------|
| 1  | C    | -0.4769 | 2.1496  | 1.2138  |
| 2  | C    | -0.1489 | 2.1627  | -0.1123 |
| 3  | C    | -0.0375 | 4.3204  | 0.6432  |
| 4  | N    | -0.4008 | 3.4736  | 1.6460  |
| 5  | N    | 0.1106  | 3.4958  | -0.4327 |
| 6  | C    | -0.6804 | 3.8993  | 3.0100  |
| 7  | H    | -0.4589 | 4.9638  | 3.0839  |
| 8  | H    | -1.7305 | 3.7144  | 3.2605  |
| 9  | H    | -0.0436 | 3.3556  | 3.7142  |
| 10 | C    | 0.5148  | 3.9454  | -1.7568 |
| 11 | H    | -0.2649 | 3.7245  | -2.4929 |
| 12 | H    | 0.6790  | 5.0241  | -1.7129 |
| 13 | H    | 1.4435  | 3.4523  | -2.0604 |
| 14 | C    | -0.0386 | 1.0615  | -1.1125 |
| 15 | H    | -0.7038 | 1.2239  | -1.9703 |
| 16 | H    | 0.9830  | 0.9728  | -1.5042 |
| 17 | H    | -0.3061 | 0.1039  | -0.6576 |
| 18 | C    | -0.8581 | 1.0313  | 2.1232  |
| 19 | H    | -0.8626 | 0.0822  | 1.5804  |
| 20 | H    | -0.1577 | 0.9351  | 2.9626  |
| 21 | H    | -1.8589 | 1.1799  | 2.5491  |
| 22 | C    | 0.0245  | 8.1739  | 0.3035  |
| 23 | N    | 0.9702  | 9.0684  | -0.0966 |
| 24 | N    | -1.1116 | 8.9240  | 0.3810  |
| 25 | C    | 0.4441  | 10.3494 | -0.2633 |
| 26 | C    | 2.3644  | 8.7262  | -0.3375 |
| 27 | C    | -0.8839 | 10.2585 | 0.0433  |
| 28 | C    | -2.4075 | 8.4049  | 0.7926  |
| 29 | C    | 1.2780  | 11.5090 | -0.6924 |
| 30 | H    | 2.5153  | 7.6901  | -0.0354 |
| 31 | H    | 2.6106  | 8.8494  | -1.3977 |
| 32 | H    | 3.0197  | 9.3677  | 0.2591  |
| 33 | C    | -1.9651 | 11.2855 | 0.0606  |
| 34 | H    | -3.1458 | 8.5370  | -0.0050 |
| 35 | H    | -2.2924 | 7.3408  | 1.0094  |
| 36 | H    | -2.7569 | 8.9196  | 1.6931  |
| 37 | H    | 0.6628  | 12.4085 | -0.7838 |
| 38 | H    | 2.0776  | 11.7209 | 0.0288  |
| 39 | H    | 1.7546  | 11.3273 | -1.6643 |
| 40 | H    | -2.7838 | 11.0245 | -0.6222 |
| 41 | H    | -2.3997 | 11.3990 | 1.0622  |
| 42 | H    | -1.5716 | 12.2588 | -0.2452 |
| 43 | Ni   | 0.2399  | 6.2648  | 0.7219  |
| 44 | Cl   | 1.9573  | 6.3948  | 2.4466  |

large\_basis\_PhI\_PhI\_bb

Energy (POTENTIAL) = -243.107614001 Eh

|    | Atom | X       | Y       | Z       |
|----|------|---------|---------|---------|
| 1  | C    | -2.2276 | 0.0432  | 0.0000  |
| 2  | C    | -0.8296 | 0.0336  | 0.0006  |
| 3  | C    | -0.1443 | 1.2514  | 0.0000  |
| 4  | C    | -0.8295 | 2.4693  | -0.0010 |
| 5  | C    | -2.2275 | 2.4599  | -0.0015 |
| 6  | C    | -2.9282 | 1.2516  | -0.0010 |
| 7  | H    | -2.7647 | -0.9016 | 0.0005  |
| 8  | H    | -0.2890 | -0.9070 | 0.0014  |
| 9  | H    | -0.2888 | 3.4099  | -0.0014 |
| 10 | H    | -2.7645 | 3.4047  | -0.0023 |
| 11 | H    | -4.0146 | 1.2516  | -0.0014 |
| 12 | I    | 1.9845  | 1.2514  | 0.0008  |

large\_basis\_C-3-Cl\_tetNiClPhIXy2\_bb  
 Energy (POTENTIAL) = -2553.05536121 Eh

|    | Atom | X       | Y       | Z       |
|----|------|---------|---------|---------|
| 1  | C    | 0.4475  | 0.3962  | -0.1598 |
| 2  | C    | 0.6541  | 1.4417  | -0.9864 |
| 3  | C    | 2.2127  | -0.1624 | -1.5170 |
| 4  | N    | 1.3894  | -0.5765 | -0.5034 |
| 5  | N    | 1.7207  | 1.0924  | -1.8061 |
| 6  | Ni   | 3.9762  | -0.7009 | -2.4450 |
| 7  | C    | 3.9612  | -2.5273 | -3.0203 |
| 8  | N    | 4.7982  | -3.4580 | -2.4362 |
| 9  | N    | 3.6033  | -3.1151 | -4.2083 |
| 10 | C    | 4.9805  | -4.5606 | -3.2740 |
| 11 | C    | 4.2315  | -4.3490 | -4.3776 |
| 12 | H    | 5.6062  | -5.3899 | -2.9833 |
| 13 | H    | 4.0654  | -4.9500 | -5.2579 |
| 14 | H    | -0.2689 | 0.2359  | 0.6300  |
| 15 | H    | 0.1554  | 2.3937  | -1.0775 |
| 16 | C    | 2.5031  | -2.7402 | -5.0691 |
| 17 | C    | 1.2187  | -3.1532 | -4.6587 |
| 18 | C    | 2.7234  | -2.1213 | -6.3102 |
| 19 | C    | 0.1308  | -2.8645 | -5.4880 |
| 20 | C    | 1.6036  | -1.8646 | -7.1162 |
| 21 | C    | 0.3204  | -2.2195 | -6.7102 |
| 22 | H    | -0.8659 | -3.1670 | -5.1774 |
| 23 | H    | 1.7538  | -1.3806 | -8.0777 |
| 24 | C    | 5.2229  | -3.5513 | -1.0479 |
| 25 | C    | 6.4051  | -2.9416 | -0.5877 |
| 26 | C    | 4.4671  | -4.4116 | -0.2235 |
| 27 | C    | 6.7828  | -3.1671 | 0.7439  |
| 28 | C    | 4.9061  | -4.6339 | 1.0867  |
| 29 | C    | 6.0486  | -4.0070 | 1.5762  |
| 30 | H    | 7.6851  | -2.6891 | 1.1157  |
| 31 | H    | 4.3339  | -5.3008 | 1.7248  |
| 32 | C    | 1.3232  | -1.8493 | 0.1681  |
| 33 | C    | 0.1952  | -2.6558 | -0.0808 |
| 34 | C    | 2.2628  | -2.1537 | 1.1659  |
| 35 | C    | 0.0311  | -3.8089 | 0.6969  |
| 36 | C    | 2.0413  | -3.3014 | 1.9370  |
| 37 | C    | 0.9379  | -4.1217 | 1.7084  |
| 38 | H    | -0.8272 | -4.4505 | 0.5149  |
| 39 | H    | 2.7479  | -3.5476 | 2.7234  |
| 40 | C    | 2.1570  | 1.9815  | -2.8523 |
| 41 | C    | 2.8087  | 3.1799  | -2.5135 |
| 42 | C    | 1.8172  | 1.6591  | -4.1771 |
| 43 | C    | 3.2082  | 4.0181  | -3.5637 |
| 44 | C    | 2.2322  | 2.5257  | -5.1938 |
| 45 | C    | 2.9364  | 3.6910  | -4.8917 |
| 46 | H    | 3.7354  | 4.9390  | -3.3283 |
| 47 | H    | 1.9937  | 2.2823  | -6.2258 |
| 48 | C    | 4.0912  | -1.7259 | -6.7973 |
| 49 | H    | 4.3771  | -0.7452 | -6.4038 |
| 50 | H    | 4.8604  | -2.4310 | -6.4775 |
| 51 | H    | 4.1038  | -1.6692 | -7.8908 |

|    |    |         |         |         |
|----|----|---------|---------|---------|
| 52 | C  | 1.0261  | -3.9125 | -3.3732 |
| 53 | H  | -0.0251 | -4.1731 | -3.2280 |
| 54 | H  | 1.6106  | -4.8400 | -3.3701 |
| 55 | H  | 1.3559  | -3.3263 | -2.5126 |
| 56 | C  | 3.2052  | -5.0777 | -0.7094 |
| 57 | H  | 3.3689  | -5.6659 | -1.6182 |
| 58 | H  | 2.8032  | -5.7435 | 0.0575  |
| 59 | H  | 2.4390  | -4.3322 | -0.9363 |
| 60 | C  | 7.2893  | -2.0985 | -1.4630 |
| 61 | H  | 8.1681  | -1.7631 | -0.9036 |
| 62 | H  | 7.6401  | -2.6622 | -2.3336 |
| 63 | H  | 6.7582  | -1.2176 | -1.8269 |
| 64 | C  | 3.0325  | 3.5963  | -1.0818 |
| 65 | H  | 3.2693  | 2.7410  | -0.4474 |
| 66 | H  | 3.8602  | 4.3092  | -1.0147 |
| 67 | H  | 2.1382  | 4.0897  | -0.6771 |
| 68 | C  | 1.0125  | 0.4270  | -4.4861 |
| 69 | H  | 0.0905  | 0.3952  | -3.8922 |
| 70 | H  | 0.7410  | 0.3923  | -5.5427 |
| 71 | H  | 1.5777  | -0.4769 | -4.2516 |
| 72 | C  | -0.8505 | -2.2785 | -1.1040 |
| 73 | H  | -0.4154 | -1.8089 | -1.9899 |
| 74 | H  | -1.4097 | -3.1628 | -1.4239 |
| 75 | H  | -1.5741 | -1.5680 | -0.6846 |
| 76 | C  | 3.4515  | -1.2643 | 1.4126  |
| 77 | H  | 3.1375  | -0.2513 | 1.6944  |
| 78 | H  | 4.0772  | -1.6661 | 2.2140  |
| 79 | H  | 4.0649  | -1.1564 | 0.5138  |
| 80 | C  | 5.3368  | -0.4431 | -3.8129 |
| 81 | C  | 5.2801  | 0.8690  | -4.3274 |
| 82 | C  | 6.2771  | -1.2993 | -4.4099 |
| 83 | C  | 6.0960  | 1.2929  | -5.3823 |
| 84 | H  | 4.6001  | 1.5873  | -3.8870 |
| 85 | C  | 7.1250  | -0.8784 | -5.4408 |
| 86 | H  | 6.3603  | -2.3293 | -4.0834 |
| 87 | C  | 7.0343  | 0.4211  | -5.9428 |
| 88 | H  | 6.0058  | 2.3134  | -5.7510 |
| 89 | H  | 7.8445  | -1.5776 | -5.8640 |
| 90 | H  | 7.6824  | 0.7498  | -6.7521 |
| 91 | Cl | 5.0734  | 0.8545  | -1.0823 |
| 92 | H  | 6.3718  | -4.1810 | 2.5992  |
| 93 | H  | -0.5313 | -2.0064 | -7.3508 |
| 94 | H  | 3.2615  | 4.3524  | -5.6906 |
| 95 | H  | 0.7869  | -5.0097 | 2.3167  |



large\_basis\_C-4-Cl\_transNiClPhIXy2\_bb  
 Energy (POTENTIAL) = -2553.09435403 Eh

|    | Atom | X       | Y       | Z       |
|----|------|---------|---------|---------|
| 1  | C    | -0.3099 | 1.5578  | 0.7002  |
| 2  | C    | 0.7902  | 2.3218  | 0.5150  |
| 3  | C    | 1.3621  | 0.1728  | -0.0217 |
| 4  | N    | 0.0500  | 0.2548  | 0.3657  |
| 5  | N    | 1.7965  | 1.4673  | 0.0652  |
| 6  | Ni   | 2.4268  | -1.4273 | -0.4082 |
| 7  | C    | 3.4795  | -3.0468 | -0.7469 |
| 8  | N    | 4.7416  | -3.3559 | -0.3116 |
| 9  | N    | 3.0571  | -4.2074 | -1.3357 |
| 10 | C    | 5.0807  | -4.6745 | -0.6041 |
| 11 | C    | 4.0186  | -5.2134 | -1.2447 |
| 12 | H    | 6.0384  | -5.0883 | -0.3295 |
| 13 | H    | 3.8466  | -6.1995 | -1.6472 |
| 14 | H    | -1.3067 | 1.8033  | 1.0321  |
| 15 | H    | 0.9639  | 3.3775  | 0.6535  |
| 16 | C    | 1.8428  | -4.3885 | -2.0895 |
| 17 | C    | 0.6401  | -4.6444 | -1.4150 |
| 18 | C    | 1.9331  | -4.3399 | -3.4918 |
| 19 | C    | -0.5125 | -4.8247 | -2.1918 |
| 20 | C    | 0.7599  | -4.5378 | -4.2280 |
| 21 | C    | -0.4556 | -4.7703 | -3.5839 |
| 22 | H    | -1.4580 | -5.0132 | -1.6920 |
| 23 | H    | 0.8022  | -4.4910 | -5.3130 |
| 24 | C    | 5.6849  | -2.4272 | 0.2563  |
| 25 | C    | 6.4361  | -1.6308 | -0.6291 |
| 26 | C    | 5.8926  | -2.4056 | 1.6451  |
| 27 | C    | 7.3192  | -0.6951 | -0.0791 |
| 28 | C    | 6.7911  | -1.4562 | 2.1518  |
| 29 | C    | 7.4809  | -0.5932 | 1.3028  |
| 30 | H    | 7.8911  | -0.0541 | -0.7448 |
| 31 | H    | 6.9516  | -1.4060 | 3.2259  |
| 32 | C    | -0.9080 | -0.8204 | 0.3357  |
| 33 | C    | -1.5651 | -1.0840 | -0.8813 |
| 34 | C    | -1.2278 | -1.4987 | 1.5231  |
| 35 | C    | -2.4663 | -2.1538 | -0.9201 |
| 36 | C    | -2.1379 | -2.5617 | 1.4383  |
| 37 | C    | -2.7352 | -2.9021 | 0.2263  |
| 38 | H    | -2.9688 | -2.3877 | -1.8549 |
| 39 | H    | -2.3822 | -3.1170 | 2.3406  |
| 40 | C    | 3.0757  | 1.9700  | -0.3660 |
| 41 | C    | 4.1985  | 1.8147  | 0.4598  |
| 42 | C    | 3.1290  | 2.6360  | -1.6037 |
| 43 | C    | 5.4178  | 2.3320  | 0.0001  |
| 44 | C    | 4.3639  | 3.1466  | -2.0175 |
| 45 | C    | 5.5020  | 2.9908  | -1.2256 |
| 46 | H    | 6.3038  | 2.2141  | 0.6170  |
| 47 | H    | 4.4321  | 3.6527  | -2.9768 |
| 48 | C    | 3.2393  | -4.0311 | -4.1789 |
| 49 | H    | 3.6401  | -3.0742 | -3.8266 |
| 50 | H    | 3.9988  | -4.7966 | -3.9809 |
| 51 | H    | 3.1013  | -3.9628 | -5.2618 |

|    |    |         |         |         |
|----|----|---------|---------|---------|
| 52 | C  | 0.5888  | -4.7259 | 0.0869  |
| 53 | H  | 1.3459  | -5.4200 | 0.4728  |
| 54 | H  | 0.7977  | -3.7525 | 0.5411  |
| 55 | H  | -0.3943 | -5.0639 | 0.4258  |
| 56 | C  | 5.2655  | -3.4179 | 2.5700  |
| 57 | H  | 5.9500  | -4.2659 | 2.7138  |
| 58 | H  | 5.0764  | -2.9794 | 3.5548  |
| 59 | H  | 4.3195  | -3.7970 | 2.1856  |
| 60 | C  | 6.3931  | -1.8526 | -2.1211 |
| 61 | H  | 7.0395  | -2.6998 | -2.3897 |
| 62 | H  | 5.3913  | -2.0792 | -2.4867 |
| 63 | H  | 6.7608  | -0.9735 | -2.6588 |
| 64 | C  | 4.1075  | 1.1073  | 1.7854  |
| 65 | H  | 3.2519  | 1.4632  | 2.3714  |
| 66 | H  | 3.9628  | 0.0316  | 1.6454  |
| 67 | H  | 5.0180  | 1.2602  | 2.3715  |
| 68 | C  | 1.9101  | 2.7477  | -2.4849 |
| 69 | H  | 1.1392  | 3.3895  | -2.0418 |
| 70 | H  | 2.1759  | 3.1632  | -3.4610 |
| 71 | H  | 1.4606  | 1.7621  | -2.6476 |
| 72 | C  | -1.4122 | -0.1745 | -2.0759 |
| 73 | H  | -0.3975 | 0.2073  | -2.1918 |
| 74 | H  | -1.6888 | -0.6909 | -2.9999 |
| 75 | H  | -2.0794 | 0.6922  | -1.9684 |
| 76 | C  | -0.7126 | -1.0562 | 2.8694  |
| 77 | H  | -1.4548 | -0.4068 | 3.3551  |
| 78 | H  | -0.5489 | -1.9165 | 3.5256  |
| 79 | H  | 0.2272  | -0.5114 | 2.7926  |
| 80 | C  | 2.5236  | -0.9369 | -2.2449 |
| 81 | C  | 1.5006  | -1.2726 | -3.1489 |
| 82 | C  | 3.6166  | -0.2218 | -2.7655 |
| 83 | C  | 1.5591  | -0.9148 | -4.5007 |
| 84 | H  | 0.6472  | -1.8417 | -2.7955 |
| 85 | C  | 3.6918  | 0.1357  | -4.1166 |
| 86 | H  | 4.4206  | 0.0774  | -2.1007 |
| 87 | C  | 2.6595  | -0.2082 | -4.9946 |
| 88 | H  | 0.7470  | -1.1985 | -5.1681 |
| 89 | H  | 4.5547  | 0.6918  | -4.4792 |
| 90 | H  | 2.7117  | 0.0699  | -6.0450 |
| 91 | Cl | 2.2967  | -2.0286 | 1.8462  |
| 92 | H  | 6.4565  | 3.3857  | -1.5641 |
| 93 | H  | 8.1646  | 0.1437  | 1.7165  |
| 94 | H  | -1.3606 | -4.9147 | -4.1687 |
| 95 | H  | -3.4315 | -3.7356 | 0.1793  |

large\_basis\_D-1\_NiIPhen2\_bb

Energy (POTENTIAL) = -1546.39870797 Eh

|    | Atom | X       | Y       | Z       |
|----|------|---------|---------|---------|
| 1  | C    | 1.2292  | 0.9498  | -0.0976 |
| 2  | C    | 2.3557  | 1.6915  | -0.1955 |
| 3  | C    | 2.9502  | -0.4981 | -0.6009 |
| 4  | N    | 1.5951  | -0.3735 | -0.3397 |
| 5  | N    | 3.3923  | 0.8119  | -0.5053 |
| 6  | Ni   | 3.9285  | -2.0328 | -0.9894 |
| 7  | C    | 4.9098  | -3.5654 | -1.3754 |
| 8  | N    | 6.2699  | -3.7817 | -1.2236 |
| 9  | N    | 4.4723  | -4.7784 | -1.8835 |
| 10 | C    | 6.6439  | -5.0635 | -1.6241 |
| 11 | C    | 5.5169  | -5.6900 | -2.0319 |
| 12 | H    | 7.6631  | -5.4115 | -1.5620 |
| 13 | H    | 5.3646  | -6.6810 | -2.4299 |
| 14 | H    | 0.2159  | 1.2331  | 0.1409  |
| 15 | H    | 2.5118  | 2.7543  | -0.0965 |
| 16 | C    | 3.1166  | -5.0793 | -2.2040 |
| 17 | C    | 2.5873  | -6.3280 | -1.8599 |
| 18 | C    | 2.3204  | -4.1342 | -2.8630 |
| 19 | C    | 1.2615  | -6.6306 | -2.1790 |
| 20 | C    | 0.9942  | -4.4418 | -3.1653 |
| 21 | C    | 0.4602  | -5.6888 | -2.8286 |
| 22 | H    | 0.8549  | -7.6004 | -1.9050 |
| 23 | H    | 0.3768  | -3.6998 | -3.6633 |
| 24 | C    | 7.1908  | -2.8138 | -0.7276 |
| 25 | C    | 8.4299  | -2.6551 | -1.3572 |
| 26 | C    | 6.8585  | -2.0297 | 0.3840  |
| 27 | C    | 9.3383  | -1.7121 | -0.8705 |
| 28 | C    | 7.7668  | -1.0809 | 0.8529  |
| 29 | C    | 9.0086  | -0.9198 | 0.2317  |
| 30 | H    | 10.2976 | -1.5896 | -1.3661 |
| 31 | H    | 7.4989  | -0.4644 | 1.7062  |
| 32 | C    | 0.6688  | -1.4567 | -0.3341 |
| 33 | C    | -0.5841 | -1.2942 | -0.9353 |
| 34 | C    | 1.0080  | -2.6728 | 0.2717  |
| 35 | C    | -1.4996 | -2.3493 | -0.9242 |
| 36 | C    | 0.0908  | -3.7235 | 0.2673  |
| 37 | C    | -1.1646 | -3.5669 | -0.3272 |
| 38 | H    | -2.4695 | -2.2193 | -1.3966 |
| 39 | H    | 0.3638  | -4.6693 | 0.7266  |
| 40 | C    | 4.7432  | 1.2266  | -0.6937 |
| 41 | C    | 5.2989  | 2.1783  | 0.1682  |
| 42 | C    | 5.5079  | 0.6882  | -1.7363 |
| 43 | C    | 6.6192  | 2.5944  | -0.0180 |
| 44 | C    | 6.8294  | 1.1003  | -1.9050 |
| 45 | C    | 7.3892  | 2.0553  | -1.0513 |
| 46 | H    | 7.0468  | 3.3308  | 0.6570  |
| 47 | H    | 7.4224  | 0.6692  | -2.7063 |
| 48 | H    | 4.7083  | 2.5754  | 0.9885  |
| 49 | H    | 5.0636  | -0.0497 | -2.3956 |
| 50 | H    | 8.4198  | 2.3713  | -1.1869 |
| 51 | H    | 1.9837  | -2.7831 | 0.7327  |

|    |   |         |         |         |
|----|---|---------|---------|---------|
| 52 | H | -0.8327 | -0.3567 | -1.4238 |
| 53 | H | -1.8739 | -4.3899 | -0.3296 |
| 54 | H | -0.5743 | -5.9216 | -3.0656 |
| 55 | H | 3.2023  | -7.0495 | -1.3301 |
| 56 | H | 2.7444  | -3.1699 | -3.1228 |
| 57 | H | 9.7113  | -0.1779 | 0.6011  |
| 58 | H | 5.8948  | -2.1672 | 0.8627  |
| 59 | H | 8.6724  | -3.2513 | -2.2321 |

large\_basis\_B-3x-Cl\_NiClPhIMes\_bb  
 Energy (POTENTIAL) = -1785.87643322 Eh

|    | Atom | X       | Y       | Z       |
|----|------|---------|---------|---------|
| 1  | Ni   | -0.1998 | 0.3385  | 0.7299  |
| 2  | C    | 0.9180  | -0.7514 | 1.7481  |
| 3  | N    | 0.5520  | -1.8764 | 2.4234  |
| 4  | N    | 2.2249  | -0.5643 | 2.0782  |
| 5  | C    | 1.6111  | -2.3769 | 3.1738  |
| 6  | C    | -0.7601 | -2.4638 | 2.3559  |
| 7  | C    | 2.6647  | -1.5501 | 2.9562  |
| 8  | C    | 3.0460  | 0.5034  | 1.5710  |
| 9  | H    | 1.5078  | -3.2591 | 3.7858  |
| 10 | C    | -1.8238 | -1.8262 | 3.0160  |
| 11 | C    | -0.9295 | -3.6536 | 1.6300  |
| 12 | H    | 3.6728  | -1.5606 | 3.3396  |
| 13 | C    | 3.9993  | 0.2020  | 0.5851  |
| 14 | C    | 2.8455  | 1.8052  | 2.0522  |
| 15 | C    | -3.0927 | -2.4037 | 2.9106  |
| 16 | C    | -1.6136 | -0.5615 | 3.8125  |
| 17 | C    | -2.2194 | -4.1911 | 1.5562  |
| 18 | C    | 0.2361  | -4.3468 | 0.9661  |
| 19 | C    | 4.7731  | 1.2536  | 0.0871  |
| 20 | C    | 4.1401  | -1.1969 | 0.0391  |
| 21 | C    | 3.6399  | 2.8250  | 1.5152  |
| 22 | C    | 1.7938  | 2.1095  | 3.0902  |
| 23 | C    | -3.3119 | -3.5779 | 2.1799  |
| 24 | H    | -3.9295 | -1.9255 | 3.4147  |
| 25 | H    | -0.6939 | -0.6029 | 4.4061  |
| 26 | H    | -1.5359 | 0.3157  | 3.1571  |
| 27 | H    | -2.4546 | -0.3866 | 4.4903  |
| 28 | H    | -2.3722 | -5.1094 | 0.9939  |
| 29 | H    | 0.8474  | -4.8883 | 1.6996  |
| 30 | H    | -0.1161 | -5.0740 | 0.2281  |
| 31 | H    | 0.8962  | -3.6372 | 0.4580  |
| 32 | C    | 4.6090  | 2.5694  | 0.5385  |
| 33 | H    | 5.5074  | 1.0427  | -0.6870 |
| 34 | H    | 4.4941  | -1.9006 | 0.8022  |
| 35 | H    | 3.1757  | -1.5686 | -0.3262 |
| 36 | H    | 4.8492  | -1.2184 | -0.7933 |
| 37 | H    | 3.4969  | 3.8423  | 1.8721  |
| 38 | H    | 1.7888  | 1.3650  | 3.8940  |
| 39 | H    | 1.9579  | 3.0962  | 3.5338  |
| 40 | H    | 0.7910  | 2.1070  | 2.6428  |
| 41 | C    | -4.7014 | -4.1542 | 2.0537  |
| 42 | C    | 5.4753  | 3.6818  | -0.0018 |
| 43 | H    | -4.6750 | -5.2282 | 1.8406  |
| 44 | H    | -5.2829 | -3.9993 | 2.9694  |
| 45 | H    | -5.2512 | -3.6706 | 1.2352  |
| 46 | H    | 6.4330  | 3.7285  | 0.5347  |
| 47 | H    | 5.7052  | 3.5312  | -1.0625 |
| 48 | H    | 4.9908  | 4.6578  | 0.1088  |
| 49 | C    | 0.6204  | -0.2475 | -0.8209 |
| 50 | C    | 1.5243  | 0.5935  | -1.4834 |
| 51 | C    | 0.3056  | -1.4931 | -1.3804 |

|    |    |         |         |         |
|----|----|---------|---------|---------|
| 52 | C  | 2.1093  | 0.1892  | -2.6887 |
| 53 | H  | 1.7859  | 1.5565  | -1.0556 |
| 54 | C  | 0.8888  | -1.8936 | -2.5894 |
| 55 | H  | -0.3957 | -2.1512 | -0.8758 |
| 56 | C  | 1.7968  | -1.0558 | -3.2434 |
| 57 | H  | 2.8154  | 0.8483  | -3.1893 |
| 58 | H  | 0.6354  | -2.8627 | -3.0141 |
| 59 | H  | 2.2567  | -1.3699 | -4.1772 |
| 60 | Cl | -1.7211 | 1.7863  | 0.1033  |

large\_basis\_TS-A-5-6-Br\_NiITMe2\_ossts\_PhBr\_t\_bb  
Energy (POTENTIAL) = -1181.41909459 Eh

|    | Atom | X       | Y       | Z       |
|----|------|---------|---------|---------|
| 1  | C    | -3.5750 | 3.3510  | 0.1943  |
| 2  | C    | -2.5766 | 4.1406  | -0.3004 |
| 3  | C    | -1.8704 | 1.9633  | -0.4591 |
| 4  | N    | -3.1232 | 2.0360  | 0.0827  |
| 5  | N    | -1.5552 | 3.2739  | -0.6923 |
| 6  | Ni   | -0.8002 | 0.4165  | -0.7521 |
| 7  | C    | 0.2379  | -1.0973 | -1.2652 |
| 8  | N    | 1.5510  | -1.3663 | -0.9956 |
| 9  | N    | -0.1711 | -2.2056 | -1.9560 |
| 10 | C    | 1.9486  | -2.6076 | -1.4921 |
| 11 | C    | 0.8519  | -3.1428 | -2.1048 |
| 12 | Br   | -0.5658 | -0.0572 | 1.8745  |
| 13 | C    | -0.3397 | -0.4640 | 3.9994  |
| 14 | C    | -0.3508 | -1.7816 | 4.4532  |
| 15 | C    | -0.1724 | 0.5945  | 4.8906  |
| 16 | C    | -0.1930 | -2.0441 | 5.8203  |
| 17 | H    | -0.4805 | -2.6030 | 3.7509  |
| 18 | C    | -0.0146 | 0.3297  | 6.2573  |
| 19 | H    | -0.1633 | 1.6209  | 4.5284  |
| 20 | C    | -0.0248 | -0.9891 | 6.7231  |
| 21 | H    | -0.2011 | -3.0716 | 6.1790  |
| 22 | H    | 0.1164  | 1.1530  | 6.9571  |
| 23 | H    | 0.0982  | -1.1937 | 7.7837  |
| 24 | C    | -3.8879 | 0.8778  | 0.5172  |
| 25 | H    | -4.8529 | 0.8419  | 0.0008  |
| 26 | H    | -3.3085 | -0.0144 | 0.2782  |
| 27 | H    | -4.0590 | 0.9117  | 1.5978  |
| 28 | C    | -0.2908 | 3.7149  | -1.2593 |
| 29 | H    | 0.3072  | 2.8259  | -1.4709 |
| 30 | H    | -0.4566 | 4.2719  | -2.1874 |
| 31 | H    | 0.2477  | 4.3536  | -0.5511 |
| 32 | C    | -2.4755 | 5.6208  | -0.4537 |
| 33 | H    | -3.3836 | 6.1060  | -0.0851 |
| 34 | H    | -1.6253 | 6.0299  | 0.1073  |
| 35 | H    | -2.3425 | 5.9118  | -1.5040 |
| 36 | C    | -4.9136 | 3.6934  | 0.7557  |
| 37 | H    | -5.7267 | 3.2478  | 0.1678  |
| 38 | H    | -5.0242 | 3.3340  | 1.7869  |
| 39 | H    | -5.0601 | 4.7771  | 0.7610  |
| 40 | C    | -1.5232 | -2.4001 | -2.4550 |
| 41 | H    | -1.9890 | -3.2689 | -1.9776 |
| 42 | H    | -2.1004 | -1.5045 | -2.2157 |
| 43 | H    | -1.5162 | -2.5506 | -3.5397 |
| 44 | C    | 2.4273  | -0.4758 | -0.2513 |
| 45 | H    | 3.3033  | -0.2109 | -0.8528 |
| 46 | H    | 1.8620  | 0.4238  | -0.0067 |
| 47 | H    | 2.7591  | -0.9506 | 0.6774  |
| 48 | C    | 3.3327  | -3.1352 | -1.3199 |
| 49 | H    | 3.5981  | -3.2355 | -0.2595 |
| 50 | H    | 3.4255  | -4.1216 | -1.7830 |
| 51 | H    | 4.0795  | -2.4762 | -1.7813 |

|    |   |         |         |         |
|----|---|---------|---------|---------|
| 52 | C | 0.6607  | -4.4353 | -2.8239 |
| 53 | H | -0.1326 | -5.0410 | -2.3673 |
| 54 | H | 0.3869  | -4.2790 | -3.8756 |
| 55 | H | 1.5836  | -5.0220 | -2.8032 |



large\_basis\_B-4-Cl\_transNiClPhIMes2\_bb  
 Energy (POTENTIAL) = -2710.42169637 Eh

|    | Atom | X       | Y       | Z       |
|----|------|---------|---------|---------|
| 1  | C    | -0.3846 | 1.5597  | 0.6291  |
| 2  | C    | 0.7496  | 2.2954  | 0.5801  |
| 3  | C    | 1.3076  | 0.1538  | 0.0061  |
| 4  | N    | -0.0317 | 0.2601  | 0.2736  |
| 5  | N    | 1.7690  | 1.4283  | 0.1886  |
| 6  | Ni   | 2.3809  | -1.4433 | -0.3567 |
| 7  | C    | 3.4772  | -3.0312 | -0.6846 |
| 8  | N    | 4.7862  | -3.2683 | -0.3526 |
| 9  | N    | 3.0464  | -4.2384 | -1.1647 |
| 10 | C    | 5.1453  | -4.5926 | -0.6011 |
| 11 | C    | 4.0511  | -5.2033 | -1.1098 |
| 12 | H    | 6.1404  | -4.9568 | -0.3984 |
| 13 | H    | 3.8829  | -6.2161 | -1.4416 |
| 14 | H    | -1.4010 | 1.8226  | 0.8778  |
| 15 | H    | 0.9386  | 3.3390  | 0.7778  |
| 16 | C    | 1.7913  | -4.4795 | -1.8333 |
| 17 | C    | 0.6621  | -4.8590 | -1.0932 |
| 18 | C    | 1.7672  | -4.3839 | -3.2356 |
| 19 | C    | -0.5304 | -5.0805 | -1.7918 |
| 20 | C    | 0.5514  | -4.6132 | -3.8871 |
| 21 | C    | -0.6106 | -4.9453 | -3.1815 |
| 22 | H    | -1.4155 | -5.3704 | -1.2323 |
| 23 | H    | 0.5124  | -4.5244 | -4.9706 |
| 24 | C    | 5.7712  | -2.2766 | 0.0069  |
| 25 | C    | 6.4878  | -1.6522 | -1.0286 |
| 26 | C    | 6.0807  | -2.0486 | 1.3592  |
| 27 | C    | 7.4481  | -0.6936 | -0.6817 |
| 28 | C    | 7.0488  | -1.0835 | 1.6545  |
| 29 | C    | 7.7323  | -0.3859 | 0.6511  |
| 30 | H    | 7.9948  | -0.1899 | -1.4758 |
| 31 | H    | 7.2853  | -0.8841 | 2.6976  |
| 32 | C    | -1.0063 | -0.7851 | 0.0952  |
| 33 | C    | -1.5857 | -0.9429 | -1.1773 |
| 34 | C    | -1.4119 | -1.5603 | 1.1928  |
| 35 | C    | -2.4838 | -1.9981 | -1.3633 |
| 36 | C    | -2.3153 | -2.6036 | 0.9553  |
| 37 | C    | -2.8429 | -2.8526 | -0.3152 |
| 38 | H    | -2.9218 | -2.1467 | -2.3481 |
| 39 | H    | -2.6196 | -3.2296 | 1.7919  |
| 40 | C    | 3.0964  | 1.8985  | -0.1133 |
| 41 | C    | 4.1328  | 1.7115  | 0.8123  |
| 42 | C    | 3.2905  | 2.5801  | -1.3268 |
| 43 | C    | 5.4005  | 2.2003  | 0.4765  |
| 44 | C    | 4.5751  | 3.0493  | -1.6160 |
| 45 | C    | 5.6436  | 2.8607  | -0.7318 |
| 46 | H    | 6.2144  | 2.0640  | 1.1824  |
| 47 | H    | 4.7457  | 3.5641  | -2.5591 |
| 48 | C    | 3.0103  | -4.0403 | -4.0173 |
| 49 | H    | 3.4262  | -3.0841 | -3.6878 |
| 50 | H    | 3.7901  | -4.8010 | -3.8887 |
| 51 | H    | 2.7876  | -3.9607 | -5.0852 |

|     |   |         |         |         |
|-----|---|---------|---------|---------|
| 52  | C | 0.7346  | -5.0626 | 0.3963  |
| 53  | H | 1.4542  | -5.8525 | 0.6501  |
| 54  | H | 1.0666  | -4.1529 | 0.9048  |
| 55  | H | -0.2420 | -5.3506 | 0.7974  |
| 56  | C | -1.9257 | -5.1301 | -3.8992 |
| 57  | H | -1.7808 | -5.5073 | -4.9179 |
| 58  | H | -2.5810 | -5.8275 | -3.3660 |
| 59  | H | -2.4623 | -4.1749 | -3.9805 |
| 60  | C | 5.4603  | -2.8727 | 2.4564  |
| 61  | H | 5.8558  | -3.8976 | 2.4358  |
| 62  | H | 5.6895  | -2.4476 | 3.4390  |
| 63  | H | 4.3753  | -2.9324 | 2.3489  |
| 64  | C | 6.3205  | -2.0632 | -2.4708 |
| 65  | H | 6.9551  | -2.9332 | -2.6895 |
| 66  | H | 5.2932  | -2.3376 | -2.7105 |
| 67  | H | 6.6216  | -1.2571 | -3.1463 |
| 68  | C | 8.7819  | 0.6386  | 1.0099  |
| 69  | H | 9.6844  | 0.1550  | 1.4070  |
| 70  | H | 9.0790  | 1.2321  | 0.1396  |
| 71  | H | 8.4226  | 1.3263  | 1.7844  |
| 72  | C | 3.8967  | 1.0150  | 2.1257  |
| 73  | H | 3.0506  | 1.4578  | 2.6663  |
| 74  | H | 3.6515  | -0.0402 | 1.9728  |
| 75  | H | 4.7834  | 1.0769  | 2.7637  |
| 76  | C | 2.1584  | 2.7729  | -2.3052 |
| 77  | H | 1.3944  | 3.4560  | -1.9140 |
| 78  | H | 2.5280  | 3.1848  | -3.2486 |
| 79  | H | 1.6652  | 1.8200  | -2.5229 |
| 80  | C | 7.0339  | 3.3275  | -1.0907 |
| 81  | H | 7.0098  | 4.2457  | -1.6886 |
| 82  | H | 7.6382  | 3.5166  | -0.1972 |
| 83  | H | 7.5579  | 2.5669  | -1.6852 |
| 84  | C | -1.3514 | 0.0560  | -2.2851 |
| 85  | H | -0.3431 | 0.4709  | -2.2730 |
| 86  | H | -1.5204 | -0.3967 | -3.2667 |
| 87  | H | -2.0552 | 0.8939  | -2.1828 |
| 88  | C | -0.9977 | -1.2371 | 2.6062  |
| 89  | H | -1.7921 | -0.6574 | 3.0980  |
| 90  | H | -0.8472 | -2.1503 | 3.1895  |
| 91  | H | -0.0740 | -0.6618 | 2.6462  |
| 92  | C | -3.8227 | -3.9800 | -0.5370 |
| 93  | H | -4.8453 | -3.6695 | -0.2816 |
| 94  | H | -3.8309 | -4.3043 | -1.5826 |
| 95  | H | -3.5841 | -4.8469 | 0.0892  |
| 96  | C | 2.5354  | -0.9226 | -2.1775 |
| 97  | C | 1.5081  | -1.2094 | -3.0938 |
| 98  | C | 3.6583  | -0.2416 | -2.6776 |
| 99  | C | 1.5907  | -0.8355 | -4.4396 |
| 100 | H | 0.6324  | -1.7518 | -2.7530 |
| 101 | C | 3.7543  | 0.1365  | -4.0220 |
| 102 | H | 4.4732  | 0.0058  | -2.0050 |
| 103 | C | 2.7182  | -0.1576 | -4.9132 |
| 104 | H | 0.7757  | -1.0812 | -5.1187 |
| 105 | H | 4.6393  | 0.6669  | -4.3702 |
| 106 | H | 2.7885  | 0.1353  | -5.9586 |

107

C1

2.1058

-2.1093

1.8748

large\_basis\_B-5-Cl\_NiIMes2\_ClPh\_bb  
 Energy (POTENTIAL) = -2710.33851328 Eh

|    | Atom | X       | Y       | Z       |
|----|------|---------|---------|---------|
| 1  | C    | -0.4610 | 1.0287  | 0.0803  |
| 2  | C    | 0.5697  | 1.8197  | -0.3030 |
| 3  | C    | 1.2773  | -0.3619 | -0.5098 |
| 4  | N    | -0.0223 | -0.2886 | -0.0471 |
| 5  | N    | 1.6145  | 0.9666  | -0.6552 |
| 6  | Ni   | 2.3390  | -1.8463 | -0.8567 |
| 7  | C    | 3.4081  | -3.3056 | -1.2868 |
| 8  | N    | 4.6939  | -3.6186 | -0.8856 |
| 9  | N    | 3.0909  | -4.3617 | -2.1123 |
| 10 | C    | 5.1414  | -4.8135 | -1.4480 |
| 11 | C    | 4.1324  | -5.2820 | -2.2206 |
| 12 | H    | 6.1256  | -5.2067 | -1.2456 |
| 13 | H    | 4.0521  | -6.1680 | -2.8316 |
| 14 | H    | -1.4554 | 1.2697  | 0.4231  |
| 15 | H    | 0.6626  | 2.8934  | -0.3622 |
| 16 | C    | 1.8184  | -4.5323 | -2.7531 |
| 17 | C    | 0.7791  | -5.1526 | -2.0410 |
| 18 | C    | 1.6632  | -4.1137 | -4.0835 |
| 19 | C    | -0.4253 | -5.3851 | -2.7114 |
| 20 | C    | 0.4343  | -4.3535 | -4.7086 |
| 21 | C    | -0.6163 | -4.9950 | -4.0423 |
| 22 | H    | -1.2371 | -5.8736 | -2.1776 |
| 23 | H    | 0.2959  | -4.0313 | -5.7386 |
| 24 | C    | 5.4707  | -2.8346 | 0.0315  |
| 25 | C    | 6.0035  | -1.6060 | -0.3967 |
| 26 | C    | 5.7051  | -3.3319 | 1.3244  |
| 27 | C    | 6.7579  | -0.8631 | 0.5169  |
| 28 | C    | 6.4669  | -2.5512 | 2.2024  |
| 29 | C    | 6.9921  | -1.3118 | 1.8219  |
| 30 | H    | 7.1721  | 0.0900  | 0.1979  |
| 31 | H    | 6.6513  | -2.9232 | 3.2082  |
| 32 | C    | -0.8164 | -1.4296 | 0.3045  |
| 33 | C    | -1.3336 | -2.2450 | -0.7163 |
| 34 | C    | -1.0794 | -1.6845 | 1.6613  |
| 35 | C    | -2.1071 | -3.3501 | -0.3455 |
| 36 | C    | -1.8603 | -2.8009 | 1.9818  |
| 37 | C    | -2.3743 | -3.6500 | 0.9952  |
| 38 | H    | -2.5095 | -3.9904 | -1.1264 |
| 39 | H    | -2.0676 | -3.0122 | 3.0290  |
| 40 | C    | 2.9098  | 1.4319  | -1.0614 |
| 41 | C    | 3.9087  | 1.5848  | -0.0875 |
| 42 | C    | 3.1263  | 1.7644  | -2.4082 |
| 43 | C    | 5.1398  | 2.1138  | -0.4883 |
| 44 | C    | 4.3778  | 2.2765  | -2.7655 |
| 45 | C    | 5.3926  | 2.4660  | -1.8188 |
| 46 | H    | 5.9222  | 2.2424  | 0.2560  |
| 47 | H    | 4.5637  | 2.5333  | -3.8063 |
| 48 | C    | 2.7802  | -3.3914 | -4.7933 |
| 49 | H    | 3.0173  | -2.4551 | -4.2719 |
| 50 | H    | 3.7023  | -3.9848 | -4.8146 |
| 51 | H    | 2.5029  | -3.1522 | -5.8248 |

|     |   |         |         |         |
|-----|---|---------|---------|---------|
| 52  | C | 0.9492  | -5.4999 | -0.5853 |
| 53  | H | 1.8495  | -6.1014 | -0.4112 |
| 54  | H | 1.0599  | -4.5802 | 0.0028  |
| 55  | H | 0.0848  | -6.0541 | -0.2072 |
| 56  | C | -1.9495 | -5.2112 | -4.7180 |
| 57  | H | -2.4198 | -6.1452 | -4.3896 |
| 58  | H | -2.6461 | -4.3963 | -4.4758 |
| 59  | H | -1.8514 | -5.2417 | -5.8086 |
| 60  | C | 5.1634  | -4.6698 | 1.7658  |
| 61  | H | 5.7738  | -5.4969 | 1.3803  |
| 62  | H | 5.1547  | -4.7439 | 2.8575  |
| 63  | H | 4.1429  | -4.8242 | 1.4056  |
| 64  | C | 5.7536  | -1.0922 | -1.7898 |
| 65  | H | 5.9355  | -1.8678 | -2.5432 |
| 66  | H | 4.7042  | -0.7872 | -1.8927 |
| 67  | H | 6.3909  | -0.2323 | -2.0116 |
| 68  | C | 7.7688  | -0.4624 | 2.8001  |
| 69  | H | 7.1184  | 0.2866  | 3.2723  |
| 70  | H | 8.2054  | -1.0676 | 3.6022  |
| 71  | H | 8.5799  | 0.0828  | 2.3036  |
| 72  | C | 3.6657  | 1.1422  | 1.3316  |
| 73  | H | 2.7768  | 1.6214  | 1.7601  |
| 74  | H | 3.4898  | 0.0597  | 1.3565  |
| 75  | H | 4.5231  | 1.3720  | 1.9710  |
| 76  | C | 2.0457  | 1.5358  | -3.4346 |
| 77  | H | 1.1342  | 2.0987  | -3.1995 |
| 78  | H | 2.3815  | 1.8315  | -4.4335 |
| 79  | H | 1.7666  | 0.4747  | -3.4616 |
| 80  | C | 6.7498  | 2.9801  | -2.2360 |
| 81  | H | 6.6730  | 3.7242  | -3.0371 |
| 82  | H | 7.2835  | 3.4374  | -1.3955 |
| 83  | H | 7.3778  | 2.1618  | -2.6153 |
| 84  | C | -1.0458 | -1.9544 | -2.1654 |
| 85  | H | -1.1744 | -0.8904 | -2.3959 |
| 86  | H | -0.0033 | -2.2077 | -2.3987 |
| 87  | H | -1.7006 | -2.5358 | -2.8199 |
| 88  | C | -0.5436 | -0.7863 | 2.7494  |
| 89  | H | -1.1537 | 0.1201  | 2.8584  |
| 90  | H | -0.5421 | -1.3041 | 3.7133  |
| 91  | H | 0.4791  | -0.4663 | 2.5328  |
| 92  | C | -3.1726 | -4.8766 | 1.3678  |
| 93  | H | -2.5177 | -5.7512 | 1.4838  |
| 94  | H | -3.7020 | -4.7405 | 2.3175  |
| 95  | H | -3.9112 | -5.1251 | 0.5973  |
| 96  | C | 2.2664  | -3.1573 | 3.7660  |
| 97  | C | 1.1355  | -3.7583 | 4.3218  |
| 98  | C | 3.4004  | -2.8925 | 4.5362  |
| 99  | C | 1.1468  | -4.1003 | 5.6768  |
| 100 | H | 0.2643  | -3.9511 | 3.7031  |
| 101 | C | 3.3981  | -3.2419 | 5.8891  |
| 102 | H | 4.2670  | -2.4236 | 4.0804  |
| 103 | C | 2.2746  | -3.8448 | 6.4622  |
| 104 | H | 0.2699  | -4.5685 | 6.1166  |
| 105 | H | 4.2783  | -3.0396 | 6.4939  |
| 106 | H | 2.2779  | -4.1139 | 7.5148  |

107

C1

2.2648

-2.7175

2.0499

large\_basis\_B-2x-Cl\_NiIMes\_e2PhCl\_bb  
Energy (POTENTIAL) = -1785.80647987 Eh

|    | Atom | X       | Y       | Z       |
|----|------|---------|---------|---------|
| 1  | Ni   | 0.0148  | 0.2122  | 0.0089  |
| 2  | C    | 0.8462  | -0.5469 | 1.5063  |
| 3  | N    | 0.4609  | -1.6260 | 2.2611  |
| 4  | N    | 2.0502  | -0.1920 | 2.0559  |
| 5  | C    | 1.4012  | -1.9303 | 3.2434  |
| 6  | C    | -0.7649 | -2.3442 | 2.0490  |
| 7  | C    | 2.4036  | -1.0251 | 3.1149  |
| 8  | C    | 2.8526  | 0.8859  | 1.5490  |
| 9  | H    | 1.2655  | -2.7519 | 3.9296  |
| 10 | C    | -1.8350 | -2.1344 | 2.9319  |
| 11 | C    | -0.8585 | -3.2289 | 0.9603  |
| 12 | H    | 3.3236  | -0.8952 | 3.6639  |
| 13 | C    | 3.8043  | 0.6098  | 0.5568  |
| 14 | C    | 2.6328  | 2.1838  | 2.0329  |
| 15 | C    | -3.0218 | -2.8422 | 2.7052  |
| 16 | C    | -1.7223 | -1.1538 | 4.0734  |
| 17 | C    | -2.0649 | -3.9090 | 0.7728  |
| 18 | C    | 0.2921  | -3.4147 | 0.0031  |
| 19 | C    | 4.5734  | 1.6735  | 0.0724  |
| 20 | C    | 3.9434  | -0.7817 | -0.0061 |
| 21 | C    | 3.4239  | 3.2161  | 1.5189  |
| 22 | C    | 1.5392  | 2.4520  | 3.0344  |
| 23 | C    | -3.1551 | -3.7325 | 1.6349  |
| 24 | H    | -3.8622 | -2.6857 | 3.3777  |
| 25 | H    | -0.9706 | -1.4670 | 4.8080  |
| 26 | H    | -1.4206 | -0.1629 | 3.7130  |
| 27 | H    | -2.6789 | -1.0514 | 4.5945  |
| 28 | H    | -2.1563 | -4.5944 | -0.0674 |
| 29 | H    | 1.2344  | -3.6010 | 0.5314  |
| 30 | H    | 0.1039  | -4.2524 | -0.6753 |
| 31 | H    | 0.4377  | -2.5069 | -0.5970 |
| 32 | C    | 4.4050  | 2.9794  | 0.5475  |
| 33 | H    | 5.3141  | 1.4773  | -0.6999 |
| 34 | H    | 4.1605  | -1.5199 | 0.7752  |
| 35 | H    | 3.0052  | -1.0900 | -0.4853 |
| 36 | H    | 4.7429  | -0.8264 | -0.7518 |
| 37 | H    | 3.2645  | 4.2298  | 1.8803  |
| 38 | H    | 1.6421  | 1.8238  | 3.9272  |
| 39 | H    | 1.5416  | 3.5001  | 3.3491  |
| 40 | H    | 0.5605  | 2.2251  | 2.5931  |
| 41 | C    | -4.4380 | -4.4957 | 1.4070  |
| 42 | C    | 5.2674  | 4.1089  | 0.0357  |
| 43 | H    | -4.3005 | -5.5677 | 1.6014  |
| 44 | H    | -5.2405 | -4.1390 | 2.0609  |
| 45 | H    | -4.7778 | -4.3999 | 0.3687  |
| 46 | H    | 6.1160  | 4.2921  | 0.7090  |
| 47 | H    | 5.6783  | 3.8845  | -0.9546 |
| 48 | H    | 4.7018  | 5.0453  | -0.0328 |
| 49 | C    | -1.1227 | 1.9364  | -0.7370 |
| 50 | H    | -2.1282 | 2.0294  | -0.3389 |
| 51 | C    | -0.7947 | 0.8320  | -1.5781 |

|    |    |         |         |         |
|----|----|---------|---------|---------|
| 52 | C  | 0.5372  | 0.7202  | -2.0813 |
| 53 | H  | 0.8036  | -0.1233 | -2.7102 |
| 54 | C  | -0.2038 | 2.9984  | -0.6009 |
| 55 | H  | -0.4823 | 3.8571  | 0.0042  |
| 56 | C  | 1.4255  | 1.8055  | -1.9355 |
| 57 | H  | 2.4196  | 1.7327  | -2.3671 |
| 58 | C  | 1.0462  | 2.9533  | -1.2299 |
| 59 | H  | 1.7390  | 3.7817  | -1.1250 |
| 60 | Cl | -2.1040 | -0.2075 | -2.2581 |



large\_basis\_NiCOD2\_NiCOD2\_bb

Energy (POTENTIAL) = -793.668115087 Eh

|    | Atom | X       | Y       | Z       |
|----|------|---------|---------|---------|
| 1  | Ni   | 1.2955  | 1.7831  | 0.0000  |
| 2  | C    | 1.6628  | 1.8252  | 2.1232  |
| 3  | H    | 0.9258  | 2.5087  | 2.5397  |
| 4  | C    | 2.7329  | 2.3987  | 1.4530  |
| 5  | H    | 2.7680  | 3.4870  | 1.4223  |
| 6  | C    | 1.3559  | -0.3513 | 0.2411  |
| 7  | H    | 0.6516  | -0.7688 | -0.4774 |
| 8  | C    | 2.5829  | 0.0608  | -0.2533 |
| 9  | H    | 2.7338  | -0.0403 | -1.3257 |
| 10 | C    | -0.7766 | 1.5888  | -0.5253 |
| 11 | H    | -1.1683 | 0.7487  | 0.0470  |
| 12 | C    | -0.6180 | 2.7869  | 0.1529  |
| 13 | H    | -0.8698 | 2.7828  | 1.2115  |
| 14 | C    | 1.5389  | 2.4417  | -2.0461 |
| 15 | H    | 2.3744  | 1.8697  | -2.4439 |
| 16 | C    | 1.8563  | 3.4806  | -1.1854 |
| 17 | H    | 2.9147  | 3.6605  | -0.9999 |
| 18 | C    | 4.0293  | 1.7156  | 1.0644  |
| 19 | C    | 1.6234  | 0.4064  | 2.6773  |
| 20 | C    | 1.0040  | -0.6102 | 1.6923  |
| 21 | C    | 3.8510  | 0.2621  | 0.5675  |
| 22 | C    | -0.5164 | 4.1659  | -0.4878 |
| 23 | C    | -0.7922 | 1.3868  | -2.0273 |
| 24 | C    | 0.2204  | 2.2701  | -2.7902 |
| 25 | C    | 0.9413  | 4.6074  | -0.7490 |
| 26 | H    | 3.8596  | -0.4314 | 1.4142  |
| 27 | H    | 4.7185  | -0.0075 | -0.0470 |
| 28 | H    | -0.0889 | -0.5599 | 1.7775  |
| 29 | H    | 1.2833  | -1.6359 | 1.9860  |
| 30 | H    | 2.6324  | 0.0919  | 2.9613  |
| 31 | H    | 1.0378  | 0.4011  | 3.6047  |
| 32 | H    | 4.4783  | 2.3070  | 0.2567  |
| 33 | H    | 4.7524  | 1.7403  | 1.8966  |
| 34 | H    | -0.9936 | 4.9010  | 0.1715  |
| 35 | H    | -1.0899 | 4.1854  | -1.4197 |
| 36 | H    | 1.3529  | 5.0229  | 0.1795  |
| 37 | H    | 0.9577  | 5.4307  | -1.4824 |
| 38 | H    | -0.2175 | 3.2497  | -3.0057 |
| 39 | H    | 0.4199  | 1.8120  | -3.7664 |
| 40 | H    | -0.5449 | 0.3341  | -2.2145 |
| 41 | H    | -1.8057 | 1.5388  | -2.4344 |

large\_basis\_A-5-Br\_NiITMe2\_BrPh\_bb  
Energy (POTENTIAL) = -1181.44663653 Eh

|    | Atom | X       | Y       | Z       |
|----|------|---------|---------|---------|
| 1  | C    | -0.3549 | 0.3218  | -0.0836 |
| 2  | C    | 0.1280  | 0.2431  | -1.3579 |
| 3  | C    | -0.2210 | 2.4694  | -0.8959 |
| 4  | N    | -0.5653 | 1.6772  | 0.1707  |
| 5  | N    | 0.1991  | 1.5546  | -1.8294 |
| 6  | C    | -1.0575 | 2.1945  | 1.4361  |
| 7  | H    | -1.1819 | 3.2732  | 1.3277  |
| 8  | H    | -2.0197 | 1.7366  | 1.6894  |
| 9  | H    | -0.3435 | 1.9969  | 2.2424  |
| 10 | C    | 0.6691  | 1.9105  | -3.1580 |
| 11 | H    | 0.0267  | 1.4696  | -3.9284 |
| 12 | H    | 0.6379  | 2.9993  | -3.2393 |
| 13 | H    | 1.6966  | 1.5629  | -3.3110 |
| 14 | C    | 0.5354  | -0.9293 | -2.1851 |
| 15 | H    | -0.0517 | -0.9983 | -3.1102 |
| 16 | H    | 1.5928  | -0.8734 | -2.4756 |
| 17 | H    | 0.3912  | -1.8595 | -1.6282 |
| 18 | C    | -0.6442 | -0.7377 | 0.9256  |
| 19 | H    | -0.3767 | -1.7230 | 0.5335  |
| 20 | H    | -0.0759 | -0.5800 | 1.8516  |
| 21 | H    | -1.7075 | -0.7623 | 1.1980  |
| 22 | C    | -0.2355 | 6.2173  | -1.1696 |
| 23 | N    | 0.7982  | 7.0522  | -1.5134 |
| 24 | N    | -1.2629 | 7.0934  | -0.9217 |
| 25 | C    | 0.4309  | 8.3976  | -1.4736 |
| 26 | C    | 2.1328  | 6.5889  | -1.8541 |
| 27 | C    | -0.8818 | 8.4243  | -1.0994 |
| 28 | C    | -2.5951 | 6.6820  | -0.5102 |
| 29 | C    | 1.3806  | 9.4973  | -1.8102 |
| 30 | H    | 2.1083  | 5.4984  | -1.8857 |
| 31 | H    | 2.4361  | 6.9788  | -2.8317 |
| 32 | H    | 2.8597  | 6.9080  | -1.0997 |
| 33 | C    | -1.8281 | 9.5616  | -0.9054 |
| 34 | H    | -3.3469 | 7.0319  | -1.2261 |
| 35 | H    | -2.6076 | 5.5904  | -0.4749 |
| 36 | H    | -2.8355 | 7.0808  | 0.4815  |
| 37 | H    | 0.8962  | 10.4709 | -1.6940 |
| 38 | H    | 2.2654  | 9.4835  | -1.1604 |
| 39 | H    | 1.7381  | 9.4229  | -2.8458 |
| 40 | H    | -2.6690 | 9.5141  | -1.6101 |
| 41 | H    | -2.2521 | 9.5694  | 0.1070  |
| 42 | H    | -1.3171 | 10.5161 | -1.0602 |
| 43 | Ni   | -0.2199 | 4.3445  | -1.0087 |
| 44 | Br   | 1.8522  | 4.4273  | 1.1243  |
| 45 | C    | 3.2306  | 4.4974  | 2.5455  |
| 46 | C    | 2.8800  | 4.9288  | 3.8270  |
| 47 | C    | 4.5425  | 4.1168  | 2.2535  |
| 48 | C    | 3.8578  | 4.9789  | 4.8254  |
| 49 | H    | 1.8573  | 5.2232  | 4.0457  |
| 50 | C    | 5.5127  | 4.1714  | 3.2590  |
| 51 | H    | 4.8067  | 3.7819  | 1.2543  |

|    |   |        |        |        |
|----|---|--------|--------|--------|
| 52 | C | 5.1739 | 4.6015 | 4.5449 |
| 53 | H | 3.5861 | 5.3140 | 5.8234 |
| 54 | H | 6.5343 | 3.8760 | 3.0329 |
| 55 | H | 5.9309 | 4.6421 | 5.3235 |

large\_basis\_Phrad\_Phrad\_bb

Energy (POTENTIAL) = -231.634154727 Eh

|    | Atom | X       | Y       | Z       |
|----|------|---------|---------|---------|
| 1  | C    | -2.2262 | 0.0360  | 0.0001  |
| 2  | C    | -0.8199 | 0.0232  | 0.0005  |
| 3  | C    | -0.1934 | 1.2514  | -0.0002 |
| 4  | C    | -0.8199 | 2.4797  | -0.0011 |
| 5  | C    | -2.2260 | 2.4671  | -0.0015 |
| 6  | C    | -2.9185 | 1.2516  | -0.0009 |
| 7  | H    | -2.7717 | -0.9050 | 0.0005  |
| 8  | H    | -0.2699 | -0.9145 | 0.0012  |
| 9  | H    | -0.2697 | 3.4174  | -0.0016 |
| 10 | H    | -2.7716 | 3.4081  | -0.0022 |
| 11 | H    | -4.0052 | 1.2516  | -0.0012 |

large\_basis\_NiCODIPhen\_NiCODIPhen\_bb  
 Energy (POTENTIAL) = -1170.02023238 Eh

|    | Atom | X       | Y       | Z       |
|----|------|---------|---------|---------|
| 1  | Ni   | -0.1561 | 0.1578  | 0.1904  |
| 2  | C    | -1.8587 | 1.4068  | -0.0744 |
| 3  | H    | -2.5302 | 1.1754  | 0.7548  |
| 4  | C    | -0.7380 | 2.1675  | 0.2297  |
| 5  | H    | -0.6233 | 2.4953  | 1.2619  |
| 6  | C    | -0.2079 | -0.0084 | -1.9358 |
| 7  | H    | -0.2262 | -1.0771 | -2.1577 |
| 8  | C    | 0.9966  | 0.5265  | -1.4862 |
| 9  | H    | 1.8753  | -0.1168 | -1.4511 |
| 10 | C    | 0.1402  | 2.8824  | -0.7916 |
| 11 | C    | -2.4324 | 1.1282  | -1.4514 |
| 12 | C    | -1.3545 | 0.8083  | -2.5127 |
| 13 | C    | 1.2874  | 2.0140  | -1.4021 |
| 14 | H    | 0.5979  | 3.7556  | -0.3126 |
| 15 | H    | -0.4910 | 3.2756  | -1.5962 |
| 16 | H    | 2.1859  | 2.1399  | -0.7922 |
| 17 | H    | 1.5347  | 2.4151  | -2.3989 |
| 18 | H    | -0.9700 | 1.7353  | -2.9510 |
| 19 | H    | -1.8210 | 0.2577  | -3.3399 |
| 20 | H    | -3.0983 | 0.2607  | -1.3578 |
| 21 | H    | -3.0688 | 1.9614  | -1.7958 |
| 22 | C    | 0.8841  | -0.5494 | 1.6037  |
| 23 | N    | 0.5292  | -1.6968 | 2.3049  |
| 24 | N    | 2.1463  | -0.2852 | 2.0858  |
| 25 | C    | 1.5542  | -2.1219 | 3.1573  |
| 26 | C    | -0.7423 | -2.3035 | 2.1714  |
| 27 | C    | 2.5671  | -1.2387 | 3.0164  |
| 28 | C    | 2.9123  | 0.8575  | 1.7076  |
| 29 | H    | 1.4812  | -3.0146 | 3.7577  |
| 30 | C    | -1.2959 | -3.0553 | 3.2165  |
| 31 | C    | -1.4777 | -2.1080 | 0.9917  |
| 32 | H    | 3.5352  | -1.1871 | 3.4908  |
| 33 | C    | 4.1570  | 0.6898  | 1.0958  |
| 34 | C    | 2.4116  | 2.1373  | 1.9635  |
| 35 | C    | -2.5740 | -3.5981 | 3.0799  |
| 36 | C    | -2.7610 | -2.6433 | 0.8720  |
| 37 | C    | 4.9020  | 1.8142  | 0.7323  |
| 38 | C    | 3.1594  | 3.2558  | 1.5949  |
| 39 | C    | -3.3164 | -3.3898 | 1.9132  |
| 40 | H    | -2.9955 | -4.1748 | 3.8987  |
| 41 | H    | -3.3174 | -2.4845 | -0.0480 |
| 42 | C    | 4.4042  | 3.0971  | 0.9775  |
| 43 | H    | 5.8673  | 1.6858  | 0.2507  |
| 44 | H    | 2.7698  | 4.2508  | 1.7916  |
| 45 | H    | 4.5247  | -0.3127 | 0.8974  |
| 46 | H    | 1.4439  | 2.2425  | 2.4409  |
| 47 | H    | 4.9845  | 3.9697  | 0.6905  |
| 48 | H    | -1.0229 | -1.6053 | 0.1288  |
| 49 | H    | -0.7477 | -3.1917 | 4.1434  |
| 50 | H    | -4.3146 | -3.8077 | 1.8170  |

large\_basis\_D-2-Cl\_NiIPhen2\_e2\_PhCl\_bb  
Energy (POTENTIAL) = -2238.36781748 Eh

|    | Atom | X       | Y       | Z       |
|----|------|---------|---------|---------|
| 1  | C    | 2.0810  | 1.2427  | 0.5183  |
| 2  | C    | 2.9228  | 1.5080  | -0.5051 |
| 3  | C    | 2.0522  | -0.5878 | -0.8684 |
| 4  | N    | 1.5482  | -0.0283 | 0.2866  |
| 5  | N    | 2.8878  | 0.3927  | -1.3411 |
| 6  | Ni   | 1.8251  | -2.3645 | -1.5670 |
| 7  | C    | 3.5196  | -3.3478 | -1.2363 |
| 8  | N    | 4.2279  | -3.5476 | -0.0741 |
| 9  | N    | 4.2034  | -4.1382 | -2.1334 |
| 10 | C    | 5.2816  | -4.4449 | -0.2404 |
| 11 | C    | 5.2695  | -4.8124 | -1.5404 |
| 12 | H    | 5.9405  | -4.7071 | 0.5727  |
| 13 | H    | 5.9272  | -5.4537 | -2.1058 |
| 14 | H    | 1.8317  | 1.8209  | 1.3935  |
| 15 | H    | 3.5273  | 2.3733  | -0.7290 |
| 16 | C    | 3.9290  | -4.2459 | -3.5305 |
| 17 | C    | 3.9144  | -5.5074 | -4.1340 |
| 18 | C    | 3.7362  | -3.0904 | -4.2868 |
| 19 | C    | 3.7132  | -5.6056 | -5.5113 |
| 20 | C    | 3.5217  | -3.1998 | -5.6601 |
| 21 | C    | 3.5159  | -4.4532 | -6.2774 |
| 22 | H    | 3.6997  | -6.5846 | -5.9822 |
| 23 | H    | 3.3628  | -2.2985 | -6.2442 |
| 24 | C    | 3.9701  | -2.9346 | 1.1934  |
| 25 | C    | 4.1450  | -1.5592 | 1.3503  |
| 26 | C    | 3.5957  | -3.7371 | 2.2745  |
| 27 | C    | 3.9156  | -0.9785 | 2.5981  |
| 28 | C    | 3.3779  | -3.1500 | 3.5219  |
| 29 | C    | 3.5318  | -1.7703 | 3.6835  |
| 30 | H    | 4.0371  | 0.0939  | 2.7180  |
| 31 | H    | 3.0783  | -3.7691 | 4.3626  |
| 32 | C    | 0.6060  | -0.6345 | 1.1731  |
| 33 | C    | -0.3630 | 0.1643  | 1.7900  |
| 34 | C    | 0.6510  | -2.0053 | 1.4334  |
| 35 | C    | -1.2818 | -0.4136 | 2.6669  |
| 36 | C    | -0.2748 | -2.5762 | 2.3048  |
| 37 | C    | -1.2433 | -1.7856 | 2.9276  |
| 38 | H    | -2.0367 | 0.2117  | 3.1359  |
| 39 | H    | -0.2300 | -3.6442 | 2.5003  |
| 40 | C    | 3.5913  | 0.3312  | -2.5853 |
| 41 | C    | 4.9872  | 0.2865  | -2.5887 |
| 42 | C    | 2.8724  | 0.3563  | -3.7830 |
| 43 | C    | 5.6695  | 0.2634  | -3.8073 |
| 44 | C    | 3.5617  | 0.3376  | -4.9963 |
| 45 | C    | 4.9590  | 0.2901  | -5.0105 |
| 46 | H    | 6.7550  | 0.2213  | -3.8145 |
| 47 | H    | 3.0052  | 0.3554  | -5.9289 |
| 48 | C    | 0.0919  | -2.4020 | -2.3475 |
| 49 | C    | 0.0033  | -1.9561 | -3.7208 |
| 50 | C    | 0.4183  | -3.8021 | -2.1294 |
| 51 | C    | 0.1809  | -2.8278 | -4.7656 |

|    |    |         |         |         |
|----|----|---------|---------|---------|
| 52 | H  | -0.2293 | -0.9109 | -3.9080 |
| 53 | C  | 0.5056  | -4.6878 | -3.2543 |
| 54 | H  | 0.1928  | -4.2499 | -1.1615 |
| 55 | C  | 0.4050  | -4.2201 | -4.5412 |
| 56 | H  | 0.1454  | -2.4520 | -5.7865 |
| 57 | H  | 0.6384  | -5.7524 | -3.0671 |
| 58 | H  | 0.5046  | -4.8935 | -5.3875 |
| 59 | Cl | -1.4298 | -1.6900 | -1.3403 |
| 60 | H  | 5.5265  | 0.2634  | -1.6462 |
| 61 | H  | 5.4925  | 0.2705  | -5.9566 |
| 62 | H  | 1.7892  | 0.3815  | -3.7543 |
| 63 | H  | 3.3540  | -4.5328 | -7.3489 |
| 64 | H  | -1.9626 | -2.2334 | 3.6078  |
| 65 | H  | -0.4211 | 1.2244  | 1.5640  |
| 66 | H  | 1.4036  | -2.6163 | 0.9534  |
| 67 | H  | 3.4648  | -4.8052 | 2.1278  |
| 68 | H  | 3.3518  | -1.3132 | 4.6525  |
| 69 | H  | 4.4489  | -0.9586 | 0.5006  |
| 70 | H  | 4.0491  | -6.3987 | -3.5285 |
| 71 | H  | 3.7500  | -2.1270 | -3.7956 |

large\_basis\_NiIMes2\_distort\_NiIMes2\_eta2\_PhCl\_bb\_NiL2frag  
Energy (POTENTIAL) = -2018.31962356 Eh

|    | Atom | X       | Y       | Z       |
|----|------|---------|---------|---------|
| 1  | C    | 1.1354  | 1.4192  | 0.0000  |
| 2  | C    | 2.1352  | 1.7031  | -0.8560 |
| 3  | C    | 1.8781  | -0.5999 | -0.8586 |
| 4  | N    | 0.9715  | 0.0344  | -0.0160 |
| 5  | N    | 2.5792  | 0.4832  | -1.3643 |
| 6  | Ni   | 2.0746  | -2.5050 | -1.4154 |
| 7  | C    | 3.7583  | -3.6476 | -1.2841 |
| 8  | N    | 4.4943  | -3.9520 | -0.1529 |
| 9  | N    | 4.2055  | -4.6234 | -2.1668 |
| 10 | C    | 5.3284  | -5.0567 | -0.3283 |
| 11 | C    | 5.1508  | -5.4735 | -1.5981 |
| 12 | H    | 5.9678  | -5.4167 | 0.4627  |
| 13 | H    | 5.5984  | -6.2802 | -2.1576 |
| 14 | H    | 0.5183  | 2.0553  | 0.6149  |
| 15 | H    | 2.5765  | 2.6398  | -1.1578 |
| 16 | C    | 3.9054  | -4.7379 | -3.5648 |
| 17 | C    | 3.2538  | -5.8834 | -4.0467 |
| 18 | C    | 4.3879  | -3.7427 | -4.4344 |
| 19 | C    | 3.0244  | -5.9768 | -5.4273 |
| 20 | C    | 4.1190  | -3.8707 | -5.7983 |
| 21 | C    | 3.4289  | -4.9765 | -6.3145 |
| 22 | H    | 2.5033  | -6.8516 | -5.8105 |
| 23 | H    | 4.4761  | -3.1002 | -6.4787 |
| 24 | C    | 4.6651  | -3.1549 | 1.0306  |
| 25 | C    | 5.6189  | -2.1238 | 0.9903  |
| 26 | C    | 4.0368  | -3.5390 | 2.2223  |
| 27 | C    | 5.8657  | -1.4106 | 2.1672  |
| 28 | C    | 4.3342  | -2.8133 | 3.3819  |
| 29 | C    | 5.2259  | -1.7356 | 3.3705  |
| 30 | H    | 6.5930  | -0.6018 | 2.1503  |
| 31 | H    | 3.8488  | -3.0936 | 4.3140  |
| 32 | C    | -0.1289 | -0.5207 | 0.7274  |
| 33 | C    | -1.4387 | -0.1898 | 0.3360  |
| 34 | C    | 0.1210  | -1.2538 | 1.8949  |
| 35 | C    | -2.4992 | -0.6536 | 1.1248  |
| 36 | C    | -0.9670 | -1.6909 | 2.6540  |
| 37 | C    | -2.2858 | -1.4091 | 2.2822  |
| 38 | H    | -3.5173 | -0.4173 | 0.8224  |
| 39 | H    | -0.7778 | -2.2682 | 3.5568  |
| 40 | C    | 3.5994  | 0.4919  | -2.3755 |
| 41 | C    | 4.9080  | 0.8479  | -2.0107 |
| 42 | C    | 3.2223  | 0.3422  | -3.7216 |
| 43 | C    | 5.8643  | 0.9680  | -3.0270 |
| 44 | C    | 4.2062  | 0.4941  | -4.7020 |
| 45 | C    | 5.5341  | 0.7927  | -4.3746 |
| 46 | H    | 6.8863  | 1.2251  | -2.7567 |
| 47 | H    | 3.9278  | 0.3747  | -5.7469 |
| 48 | C    | 5.2262  | -2.6067 | -3.9105 |
| 49 | H    | 4.6401  | -1.9376 | -3.2772 |
| 50 | H    | 6.0544  | -2.9852 | -3.2993 |
| 51 | H    | 5.6455  | -2.0230 | -4.7326 |



|    |   |         |         |         |
|----|---|---------|---------|---------|
| 52 | C | 2.8092  | -7.0096 | -3.1425 |
| 53 | H | 3.5600  | -7.8106 | -3.1165 |
| 54 | H | 2.6509  | -6.6820 | -2.1118 |
| 55 | H | 1.8761  | -7.4506 | -3.5088 |
| 56 | C | 3.1242  | -5.0689 | -7.7904 |
| 57 | H | 2.8379  | -6.0853 | -8.0807 |
| 58 | H | 2.2948  | -4.4017 | -8.0609 |
| 59 | H | 3.9873  | -4.7706 | -8.3975 |
| 60 | C | 3.0666  | -4.6919 | 2.2452  |
| 61 | H | 3.5442  | -5.6253 | 1.9227  |
| 62 | H | 2.6645  | -4.8467 | 3.2512  |
| 63 | H | 2.2285  | -4.5104 | 1.5634  |
| 64 | C | 6.4009  | -1.8579 | -0.2714 |
| 65 | H | 6.9499  | -2.7559 | -0.5818 |
| 66 | H | 5.7439  | -1.5834 | -1.1010 |
| 67 | H | 7.1265  | -1.0546 | -0.1224 |
| 68 | C | 5.4876  | -0.9349 | 4.6236  |
| 69 | H | 5.3475  | -1.5412 | 5.5254  |
| 70 | H | 6.5060  | -0.5306 | 4.6372  |
| 71 | H | 4.7987  | -0.0821 | 4.6951  |
| 72 | C | 5.2641  | 1.1678  | -0.5793 |
| 73 | H | 4.9010  | 2.1656  | -0.3014 |
| 74 | H | 4.8186  | 0.4583  | 0.1231  |
| 75 | H | 6.3483  | 1.1644  | -0.4378 |
| 76 | C | 1.7918  | 0.0565  | -4.0875 |
| 77 | H | 1.1194  | 0.8319  | -3.6982 |
| 78 | H | 1.6654  | 0.0044  | -5.1734 |
| 79 | H | 1.4652  | -0.8923 | -3.6566 |
| 80 | C | 6.5890  | 0.8875  | -5.4499 |
| 81 | H | 7.4083  | 1.5527  | -5.1557 |
| 82 | H | 7.0282  | -0.0994 | -5.6528 |
| 83 | H | 6.1701  | 1.2550  | -6.3935 |
| 84 | C | -1.7231 | 0.6386  | -0.8950 |
| 85 | H | -1.0382 | 0.3934  | -1.7112 |
| 86 | H | -2.7461 | 0.4661  | -1.2449 |
| 87 | H | -1.6216 | 1.7120  | -0.6913 |
| 88 | C | 1.5304  | -1.5515 | 2.3102  |
| 89 | H | 2.0953  | -0.6321 | 2.5110  |
| 90 | H | 1.5552  | -2.1711 | 3.2097  |
| 91 | H | 2.0603  | -2.0738 | 1.5114  |
| 92 | C | -3.4449 | -1.9355 | 3.0939  |
| 93 | H | -4.3532 | -1.3448 | 2.9320  |
| 94 | H | -3.6755 | -2.9737 | 2.8187  |
| 95 | H | -3.2194 | -1.9293 | 4.1667  |

large\_basis\_IPhen\_IPhen\_bb

Energy (POTENTIAL) = -688.496357545 Eh

|    | Atom | X       | Y       | Z       |
|----|------|---------|---------|---------|
| 1  | C    | -0.6466 | 0.9681  | -1.0949 |
| 2  | C    | 0.4499  | 1.7141  | -1.3587 |
| 3  | C    | 1.1837  | -0.2414 | -0.3732 |
| 4  | N    | -0.1820 | -0.2087 | -0.4976 |
| 5  | N    | 1.5457  | 0.9669  | -0.9127 |
| 6  | H    | -1.6945 | 1.1808  | -1.2388 |
| 7  | H    | 0.5438  | 2.7045  | -1.7763 |
| 8  | C    | -1.0315 | -1.2735 | -0.0740 |
| 9  | C    | -2.1980 | -1.5673 | -0.7891 |
| 10 | C    | -0.6968 | -2.0198 | 1.0619  |
| 11 | C    | -3.0312 | -2.6020 | -0.3596 |
| 12 | C    | -1.5290 | -3.0601 | 1.4744  |
| 13 | C    | -2.7010 | -3.3529 | 0.7708  |
| 14 | H    | -3.9347 | -2.8260 | -0.9204 |
| 15 | H    | -1.2637 | -3.6364 | 2.3566  |
| 16 | C    | 2.8997  | 1.4059  | -1.0115 |
| 17 | C    | 3.8175  | 1.0561  | -0.0143 |
| 18 | C    | 3.3063  | 2.1892  | -2.0978 |
| 19 | C    | 5.1398  | 1.4888  | -0.1109 |
| 20 | C    | 4.6292  | 2.6284  | -2.1776 |
| 21 | C    | 5.5507  | 2.2801  | -1.1877 |
| 22 | H    | 5.8479  | 1.2141  | 0.6662  |
| 23 | H    | 4.9385  | 3.2356  | -3.0240 |
| 24 | H    | 3.4866  | 0.4507  | 0.8220  |
| 25 | H    | 2.6009  | 2.4379  | -2.8846 |
| 26 | H    | 6.5802  | 2.6208  | -1.2546 |
| 27 | H    | 0.2100  | -1.7800 | 1.6056  |
| 28 | H    | -3.3497 | -4.1599 | 1.1000  |
| 29 | H    | -2.4434 | -1.0067 | -1.6858 |

large\_basis\_A-6-Br\_NiBrITMe2\_bb  
 Energy (POTENTIAL) = -949.818278044 Eh

|    | Atom | X       | Y       | Z       |
|----|------|---------|---------|---------|
| 1  | C    | -0.4894 | 2.1504  | 1.2060  |
| 2  | C    | -0.0973 | 2.1475  | -0.1025 |
| 3  | C    | -0.0612 | 4.3188  | 0.6202  |
| 4  | N    | -0.4605 | 3.4827  | 1.6176  |
| 5  | N    | 0.1544  | 3.4800  | -0.4330 |
| 6  | C    | -0.8152 | 3.9248  | 2.9583  |
| 7  | H    | -0.6376 | 4.9985  | 3.0185  |
| 8  | H    | -1.8676 | 3.7043  | 3.1667  |
| 9  | H    | -0.1891 | 3.4230  | 3.7018  |
| 10 | C    | 0.6171  | 3.9151  | -1.7424 |
| 11 | H    | -0.1089 | 3.6461  | -2.5164 |
| 12 | H    | 0.7360  | 5.0003  | -1.7166 |
| 13 | H    | 1.5805  | 3.4533  | -1.9809 |
| 14 | C    | 0.0696  | 1.0336  | -1.0808 |
| 15 | H    | -0.5665 | 1.1727  | -1.9644 |
| 16 | H    | 1.1059  | 0.9566  | -1.4343 |
| 17 | H    | -0.1992 | 0.0784  | -0.6218 |
| 18 | C    | -0.8954 | 1.0405  | 2.1154  |
| 19 | H    | -0.8426 | 0.0807  | 1.5944  |
| 20 | H    | -0.2436 | 0.9805  | 2.9963  |
| 21 | H    | -1.9231 | 1.1703  | 2.4788  |
| 22 | C    | 0.0026  | 8.1737  | 0.2801  |
| 23 | N    | 0.9428  | 9.0544  | -0.1596 |
| 24 | N    | -1.1144 | 8.9428  | 0.4217  |
| 25 | C    | 0.4339  | 10.3472 | -0.2843 |
| 26 | C    | 2.3193  | 8.6919  | -0.4636 |
| 27 | C    | -0.8785 | 10.2772 | 0.0884  |
| 28 | C    | -2.3978 | 8.4415  | 0.8896  |
| 29 | C    | 1.2690  | 11.4956 | -0.7406 |
| 30 | H    | 2.4580  | 7.6421  | -0.2060 |
| 31 | H    | 2.5299  | 8.8505  | -1.5267 |
| 32 | H    | 3.0108  | 9.2939  | 0.1331  |
| 33 | C    | -1.9380 | 11.3232 | 0.1736  |
| 34 | H    | -3.1721 | 8.5996  | 0.1318  |
| 35 | H    | -2.2930 | 7.3721  | 1.0846  |
| 36 | H    | -2.6930 | 8.9484  | 1.8137  |
| 37 | H    | 0.6710  | 12.4102 | -0.7834 |
| 38 | H    | 2.1112  | 11.6771 | -0.0609 |
| 39 | H    | 1.6875  | 11.3203 | -1.7401 |
| 40 | H    | -2.7947 | 11.0874 | -0.4709 |
| 41 | H    | -2.3195 | 11.4295 | 1.1974  |
| 42 | H    | -1.5423 | 12.2937 | -0.1382 |
| 43 | Ni   | 0.2028  | 6.2627  | 0.6833  |
| 44 | Br   | 2.0449  | 6.3896  | 2.5376  |

large\_basis\_A-3-Cl\_cis-NiClPhITMe2\_bb  
Energy (POTENTIAL) = -1628.59300135 Eh

|    | Atom | X       | Y       | Z       |
|----|------|---------|---------|---------|
| 1  | C    | 0.2636  | 0.4374  | -0.8143 |
| 2  | C    | 1.2393  | -0.0788 | -0.0121 |
| 3  | C    | -0.1108 | -1.8091 | -0.6464 |
| 4  | N    | -0.5471 | -0.6400 | -1.1843 |
| 5  | N    | 0.9827  | -1.4506 | 0.0753  |
| 6  | Ni   | -0.8232 | -3.6229 | -1.0123 |
| 7  | C    | 0.7469  | -4.0552 | -1.9549 |
| 8  | N    | 1.7457  | -4.8987 | -1.5887 |
| 9  | N    | 1.1250  | -3.5873 | -3.1723 |
| 10 | C    | 2.7454  | -4.9623 | -2.5662 |
| 11 | C    | 2.3527  | -4.1287 | -3.5711 |
| 12 | C    | -1.6891 | -5.7121 | -2.8953 |
| 13 | C    | -2.1892 | -6.9616 | -3.2836 |
| 14 | C    | -1.4671 | -5.3741 | -1.5447 |
| 15 | C    | -2.4605 | -7.9375 | -2.3208 |
| 16 | H    | -2.3577 | -7.1766 | -4.3380 |
| 17 | C    | -1.7561 | -6.3799 | -0.5994 |
| 18 | C    | -2.2360 | -7.6401 | -0.9721 |
| 19 | H    | -2.8389 | -8.9140 | -2.6153 |
| 20 | H    | -1.6162 | -6.1664 | 0.4588  |
| 21 | H    | -2.4427 | -8.3898 | -0.2096 |
| 22 | C    | -1.7357 | -0.5072 | -2.0149 |
| 23 | H    | -1.4657 | -0.1727 | -3.0217 |
| 24 | H    | -2.2283 | -1.4774 | -2.0638 |
| 25 | H    | -2.4255 | 0.2161  | -1.5704 |
| 26 | C    | -0.0058 | 1.8312  | -1.2703 |
| 27 | H    | -0.0031 | 1.9065  | -2.3653 |
| 28 | H    | -0.9829 | 2.1894  | -0.9215 |
| 29 | H    | 0.7572  | 2.5131  | -0.8852 |
| 30 | C    | 2.3793  | 0.5717  | 0.6956  |
| 31 | H    | 3.3436  | 0.1435  | 0.3933  |
| 32 | H    | 2.4029  | 1.6421  | 0.4736  |
| 33 | H    | 2.2982  | 0.4581  | 1.7843  |
| 34 | C    | 1.7972  | -2.3897 | 0.8318  |
| 35 | H    | 1.2274  | -3.3097 | 0.9522  |
| 36 | H    | 2.7338  | -2.6061 | 0.3069  |
| 37 | H    | 2.0251  | -1.9789 | 1.8187  |
| 38 | C    | 1.7462  | -5.7074 | -0.3782 |
| 39 | H    | 1.7418  | -6.7708 | -0.6349 |
| 40 | H    | 2.6292  | -5.4851 | 0.2282  |
| 41 | H    | 0.8450  | -5.4790 | 0.1884  |
| 42 | C    | 0.3650  | -2.6193 | -3.9500 |
| 43 | H    | 0.8207  | -1.6258 | -3.8849 |
| 44 | H    | 0.3260  | -2.9301 | -4.9968 |
| 45 | H    | -0.6481 | -2.5784 | -3.5524 |
| 46 | C    | 3.9504  | -5.8260 | -2.4135 |
| 47 | H    | 4.5270  | -5.5632 | -1.5172 |
| 48 | H    | 3.6795  | -6.8861 | -2.3280 |
| 49 | H    | 4.6082  | -5.7177 | -3.2800 |
| 50 | C    | 2.9968  | -3.7787 | -4.8695 |
| 51 | H    | 2.3766  | -4.0784 | -5.7241 |

|    |    |         |         |         |
|----|----|---------|---------|---------|
| 52 | H  | 3.1744  | -2.6992 | -4.9561 |
| 53 | H  | 3.9607  | -4.2861 | -4.9628 |
| 54 | H  | -1.4584 | -4.9822 | -3.6712 |
| 55 | Cl | -2.7404 | -3.1858 | 0.2028  |

large\_basis\_C-1\_NiIXy2\_bb

Energy (POTENTIAL) = -1861.05447589 Eh

|    | Atom | X       | Y       | Z       |
|----|------|---------|---------|---------|
| 1  | C    | -0.0609 | 0.0050  | 0.3271  |
| 2  | C    | 0.9900  | 0.7587  | -0.0807 |
| 3  | C    | 1.5418  | -1.4398 | -0.4656 |
| 4  | N    | 0.2863  | -1.3249 | 0.0888  |
| 5  | N    | 1.9546  | -0.1284 | -0.5547 |
| 6  | Ni   | 2.4800  | -2.9327 | -1.0184 |
| 7  | C    | 3.4876  | -4.3901 | -1.5403 |
| 8  | N    | 4.7944  | -4.6568 | -1.1962 |
| 9  | N    | 3.1435  | -5.4895 | -2.2951 |
| 10 | C    | 5.2346  | -5.8750 | -1.7108 |
| 11 | C    | 4.1948  | -6.3992 | -2.4057 |
| 12 | H    | 6.2317  | -6.2469 | -1.5309 |
| 13 | H    | 4.0978  | -7.3219 | -2.9569 |
| 14 | H    | -1.0129 | 0.2813  | 0.7540  |
| 15 | H    | 1.1425  | 1.8272  | -0.0847 |
| 16 | C    | 1.8500  | -5.6664 | -2.8906 |
| 17 | C    | 0.7809  | -6.0892 | -2.0820 |
| 18 | C    | 1.7028  | -5.4191 | -4.2664 |
| 19 | C    | -0.4640 | -6.2806 | -2.6942 |
| 20 | C    | 0.4407  | -5.6200 | -4.8381 |
| 21 | C    | -0.6341 | -6.0522 | -4.0600 |
| 22 | H    | -1.3041 | -6.6085 | -2.0884 |
| 23 | H    | 0.3036  | -5.4307 | -5.8999 |
| 24 | C    | 5.5918  | -3.7741 | -0.3921 |
| 25 | C    | 6.5096  | -2.9241 | -1.0305 |
| 26 | C    | 5.4259  | -3.7930 | 1.0036  |
| 27 | C    | 7.2953  | -2.0880 | -0.2280 |
| 28 | C    | 6.2255  | -2.9356 | 1.7689  |
| 29 | C    | 7.1579  | -2.0945 | 1.1602  |
| 30 | H    | 8.0080  | -1.4179 | -0.7011 |
| 31 | H    | 6.1113  | -2.9296 | 2.8500  |
| 32 | C    | -0.5522 | -2.4501 | 0.3900  |
| 33 | C    | -1.2434 | -3.0840 | -0.6570 |
| 34 | C    | -0.6577 | -2.8723 | 1.7268  |
| 35 | C    | -2.0770 | -4.1610 | -0.3309 |
| 36 | C    | -1.4997 | -3.9547 | 2.0088  |
| 37 | C    | -2.2090 | -4.5915 | 0.9895  |
| 38 | H    | -2.6203 | -4.6651 | -1.1252 |
| 39 | H    | -1.5927 | -4.2997 | 3.0356  |
| 40 | C    | 3.2366  | 0.2572  | -1.0746 |
| 41 | C    | 4.2671  | 0.5613  | -0.1699 |
| 42 | C    | 3.4154  | 0.3112  | -2.4677 |
| 43 | C    | 5.5049  | 0.9519  | -0.6942 |
| 44 | C    | 4.6711  | 0.6985  | -2.9510 |
| 45 | C    | 5.7065  | 1.0214  | -2.0729 |
| 46 | H    | 6.3184  | 1.1853  | -0.0127 |
| 47 | H    | 4.8345  | 0.7417  | -4.0250 |
| 48 | C    | 2.8645  | -4.9192 | -5.0879 |
| 49 | H    | 3.2670  | -3.9901 | -4.6654 |
| 50 | H    | 3.6897  | -5.6410 | -5.1114 |
| 51 | H    | 2.5576  | -4.7222 | -6.1197 |

|    |   |         |         |         |
|----|---|---------|---------|---------|
| 52 | C | 0.9619  | -6.2796 | -0.5989 |
| 53 | H | 1.8200  | -6.9244 | -0.3742 |
| 54 | H | 1.1599  | -5.3089 | -0.1248 |
| 55 | H | 0.0679  | -6.7153 | -0.1436 |
| 56 | C | 4.3766  | -4.6655 | 1.6411  |
| 57 | H | 4.4534  | -5.7079 | 1.3095  |
| 58 | H | 4.4515  | -4.6414 | 2.7329  |
| 59 | H | 3.3781  | -4.3121 | 1.3472  |
| 60 | C | 6.6016  | -2.8768 | -2.5348 |
| 61 | H | 6.8503  | -3.8548 | -2.9636 |
| 62 | H | 5.6398  | -2.5722 | -2.9652 |
| 63 | H | 7.3617  | -2.1589 | -2.8580 |
| 64 | C | 4.0554  | 0.4119  | 1.3156  |
| 65 | H | 3.2511  | 1.0604  | 1.6834  |
| 66 | H | 3.7719  | -0.6197 | 1.5569  |
| 67 | H | 4.9686  | 0.6534  | 1.8678  |
| 68 | C | 2.3050  | -0.0932 | -3.4018 |
| 69 | H | 1.3684  | 0.4297  | -3.1745 |
| 70 | H | 2.5718  | 0.1094  | -4.4439 |
| 71 | H | 2.1047  | -1.1683 | -3.2909 |
| 72 | C | -1.0488 | -2.6509 | -2.0862 |
| 73 | H | -1.1856 | -1.5694 | -2.2050 |
| 74 | H | -0.0223 | -2.8793 | -2.4037 |
| 75 | H | -1.7451 | -3.1667 | -2.7535 |
| 76 | C | 0.1416  | -2.1987 | 2.8143  |
| 77 | H | -0.1339 | -1.1438 | 2.9319  |
| 78 | H | -0.0104 | -2.6979 | 3.7763  |
| 79 | H | 1.2128  | -2.2228 | 2.5796  |
| 80 | H | 7.7734  | -1.4368 | 1.7689  |
| 81 | H | -1.6075 | -6.2067 | -4.5187 |
| 82 | H | -2.8613 | -5.4289 | 1.2244  |
| 83 | H | 6.6752  | 1.3219  | -2.4641 |

large\_basis\_B-2-Cl\_NiIMes2\_eta2\_PhCl\_bb  
Energy (POTENTIAL) = -2710.32115799 Eh

|    | Atom | X       | Y       | Z       |
|----|------|---------|---------|---------|
| 1  | C    | 1.1354  | 1.4192  | 0.0000  |
| 2  | C    | 2.1352  | 1.7031  | -0.8560 |
| 3  | C    | 1.8781  | -0.5999 | -0.8586 |
| 4  | N    | 0.9715  | 0.0344  | -0.0160 |
| 5  | N    | 2.5792  | 0.4832  | -1.3643 |
| 6  | Ni   | 2.0746  | -2.5050 | -1.4154 |
| 7  | C    | 3.7583  | -3.6476 | -1.2841 |
| 8  | N    | 4.4943  | -3.9520 | -0.1529 |
| 9  | N    | 4.2055  | -4.6234 | -2.1668 |
| 10 | C    | 5.3284  | -5.0567 | -0.3283 |
| 11 | C    | 5.1508  | -5.4735 | -1.5981 |
| 12 | H    | 5.9678  | -5.4167 | 0.4627  |
| 13 | H    | 5.5984  | -6.2802 | -2.1576 |
| 14 | H    | 0.5183  | 2.0553  | 0.6149  |
| 15 | H    | 2.5765  | 2.6398  | -1.1578 |
| 16 | C    | 3.9054  | -4.7379 | -3.5648 |
| 17 | C    | 3.2538  | -5.8834 | -4.0467 |
| 18 | C    | 4.3879  | -3.7427 | -4.4344 |
| 19 | C    | 3.0244  | -5.9768 | -5.4273 |
| 20 | C    | 4.1190  | -3.8707 | -5.7983 |
| 21 | C    | 3.4289  | -4.9765 | -6.3145 |
| 22 | H    | 2.5033  | -6.8516 | -5.8105 |
| 23 | H    | 4.4761  | -3.1002 | -6.4787 |
| 24 | C    | 4.6651  | -3.1549 | 1.0306  |
| 25 | C    | 5.6189  | -2.1238 | 0.9903  |
| 26 | C    | 4.0368  | -3.5390 | 2.2223  |
| 27 | C    | 5.8657  | -1.4106 | 2.1672  |
| 28 | C    | 4.3342  | -2.8133 | 3.3819  |
| 29 | C    | 5.2259  | -1.7356 | 3.3705  |
| 30 | H    | 6.5930  | -0.6018 | 2.1503  |
| 31 | H    | 3.8488  | -3.0936 | 4.3140  |
| 32 | C    | -0.1289 | -0.5207 | 0.7274  |
| 33 | C    | -1.4387 | -0.1898 | 0.3360  |
| 34 | C    | 0.1210  | -1.2538 | 1.8949  |
| 35 | C    | -2.4992 | -0.6536 | 1.1248  |
| 36 | C    | -0.9670 | -1.6909 | 2.6540  |
| 37 | C    | -2.2858 | -1.4091 | 2.2822  |
| 38 | H    | -3.5173 | -0.4173 | 0.8224  |
| 39 | H    | -0.7778 | -2.2682 | 3.5568  |
| 40 | C    | 3.5994  | 0.4919  | -2.3755 |
| 41 | C    | 4.9080  | 0.8479  | -2.0107 |
| 42 | C    | 3.2223  | 0.3422  | -3.7216 |
| 43 | C    | 5.8643  | 0.9680  | -3.0270 |
| 44 | C    | 4.2062  | 0.4941  | -4.7020 |
| 45 | C    | 5.5341  | 0.7927  | -4.3746 |
| 46 | H    | 6.8863  | 1.2251  | -2.7567 |
| 47 | H    | 3.9278  | 0.3747  | -5.7469 |
| 48 | C    | 5.2262  | -2.6067 | -3.9105 |
| 49 | H    | 4.6401  | -1.9376 | -3.2772 |
| 50 | H    | 6.0544  | -2.9852 | -3.2993 |
| 51 | H    | 5.6455  | -2.0230 | -4.7326 |



|     |   |         |         |         |
|-----|---|---------|---------|---------|
| 52  | C | 2.8092  | -7.0096 | -3.1425 |
| 53  | H | 3.5600  | -7.8106 | -3.1165 |
| 54  | H | 2.6509  | -6.6820 | -2.1118 |
| 55  | H | 1.8761  | -7.4506 | -3.5088 |
| 56  | C | 3.1242  | -5.0689 | -7.7904 |
| 57  | H | 2.8379  | -6.0853 | -8.0807 |
| 58  | H | 2.2948  | -4.4017 | -8.0609 |
| 59  | H | 3.9873  | -4.7706 | -8.3975 |
| 60  | C | 3.0666  | -4.6919 | 2.2452  |
| 61  | H | 3.5442  | -5.6253 | 1.9227  |
| 62  | H | 2.6645  | -4.8467 | 3.2512  |
| 63  | H | 2.2285  | -4.5104 | 1.5634  |
| 64  | C | 6.4009  | -1.8579 | -0.2714 |
| 65  | H | 6.9499  | -2.7559 | -0.5818 |
| 66  | H | 5.7439  | -1.5834 | -1.1010 |
| 67  | H | 7.1265  | -1.0546 | -0.1224 |
| 68  | C | 5.4876  | -0.9349 | 4.6236  |
| 69  | H | 5.3475  | -1.5412 | 5.5254  |
| 70  | H | 6.5060  | -0.5306 | 4.6372  |
| 71  | H | 4.7987  | -0.0821 | 4.6951  |
| 72  | C | 5.2641  | 1.1678  | -0.5793 |
| 73  | H | 4.9010  | 2.1656  | -0.3014 |
| 74  | H | 4.8186  | 0.4583  | 0.1231  |
| 75  | H | 6.3483  | 1.1644  | -0.4378 |
| 76  | C | 1.7918  | 0.0565  | -4.0875 |
| 77  | H | 1.1194  | 0.8319  | -3.6982 |
| 78  | H | 1.6654  | 0.0044  | -5.1734 |
| 79  | H | 1.4652  | -0.8923 | -3.6566 |
| 80  | C | 6.5890  | 0.8875  | -5.4499 |
| 81  | H | 7.4083  | 1.5527  | -5.1557 |
| 82  | H | 7.0282  | -0.0994 | -5.6528 |
| 83  | H | 6.1701  | 1.2550  | -6.3935 |
| 84  | C | -1.7231 | 0.6386  | -0.8950 |
| 85  | H | -1.0382 | 0.3934  | -1.7112 |
| 86  | H | -2.7461 | 0.4661  | -1.2449 |
| 87  | H | -1.6216 | 1.7120  | -0.6913 |
| 88  | C | 1.5304  | -1.5515 | 2.3102  |
| 89  | H | 2.0953  | -0.6321 | 2.5110  |
| 90  | H | 1.5552  | -2.1711 | 3.2097  |
| 91  | H | 2.0603  | -2.0738 | 1.5114  |
| 92  | C | -3.4449 | -1.9355 | 3.0939  |
| 93  | H | -4.3532 | -1.3448 | 2.9320  |
| 94  | H | -3.6755 | -2.9737 | 2.8187  |
| 95  | H | -3.2194 | -1.9293 | 4.1667  |
| 96  | C | 0.1944  | -3.1925 | -1.5224 |
| 97  | C | -0.9413 | -2.4416 | -1.9783 |
| 98  | C | 1.0252  | -3.8947 | -2.4764 |
| 99  | C | -1.0992 | -2.1716 | -3.3148 |
| 100 | H | -1.6568 | -2.0868 | -1.2480 |
| 101 | C | 0.7995  | -3.5841 | -3.8633 |
| 102 | H | 1.4233  | -4.8732 | -2.2353 |
| 103 | C | -0.1982 | -2.7293 | -4.2699 |
| 104 | H | -1.9267 | -1.5485 | -3.6462 |
| 105 | H | 1.4054  | -4.0874 | -4.6077 |
| 106 | H | -0.3367 | -2.5184 | -5.3279 |

107

C1

-0.1053

-4.0922

0.0616

large\_basis\_NiCODIXy\_NiCODIXy\_bb  
Energy (POTENTIAL) = -1327.34590008 Eh

|    | Atom | X       | Y       | Z       |
|----|------|---------|---------|---------|
| 1  | Ni   | -1.2346 | 0.6714  | -0.0020 |
| 2  | C    | -3.1362 | 1.7031  | -0.0373 |
| 3  | H    | -3.7201 | 1.2650  | 0.7755  |
| 4  | C    | -2.1155 | 2.5640  | 0.3293  |
| 5  | H    | -1.9970 | 2.7700  | 1.3917  |
| 6  | C    | -1.3866 | 0.7573  | -2.0959 |
| 7  | H    | -1.2858 | -0.2706 | -2.4547 |
| 8  | C    | -0.2244 | 1.3752  | -1.6240 |
| 9  | H    | 0.7297  | 0.8606  | -1.7329 |
| 10 | C    | -1.3574 | 3.4936  | -0.6103 |
| 11 | C    | -3.7195 | 1.4974  | -1.4215 |
| 12 | C    | -2.6512 | 1.4794  | -2.5387 |
| 13 | C    | -0.1077 | 2.8549  | -1.2998 |
| 14 | H    | -1.0136 | 4.3657  | -0.0414 |
| 15 | H    | -2.0418 | 3.8803  | -1.3724 |
| 16 | H    | 0.7548  | 2.9727  | -0.6361 |
| 17 | H    | 0.1218  | 3.4408  | -2.2057 |
| 18 | H    | -2.4152 | 2.5011  | -2.8539 |
| 19 | H    | -3.0719 | 0.9841  | -3.4240 |
| 20 | H    | -4.2327 | 0.5267  | -1.4158 |
| 21 | H    | -4.4956 | 2.2493  | -1.6470 |
| 22 | C    | -0.2138 | -0.0224 | 1.4286  |
| 23 | N    | -0.6093 | -1.1280 | 2.1522  |
| 24 | N    | 0.9973  | 0.2902  | 2.0013  |
| 25 | C    | 0.3222  | -1.4832 | 3.1277  |
| 26 | C    | -1.8676 | -1.7718 | 1.9128  |
| 27 | C    | 1.3356  | -0.5886 | 3.0340  |
| 28 | C    | 1.8228  | 1.3633  | 1.5318  |
| 29 | H    | 0.1739  | -2.3276 | 3.7834  |
| 30 | C    | -2.9677 | -1.4167 | 2.7123  |
| 31 | C    | -1.9695 | -2.6927 | 0.8560  |
| 32 | H    | 2.2560  | -0.4920 | 3.5893  |
| 33 | C    | 2.7371  | 1.1047  | 0.4976  |
| 34 | C    | 1.6781  | 2.6333  | 2.1119  |
| 35 | C    | -4.1989 | -2.0259 | 2.4421  |
| 36 | C    | -2.8232 | -0.3845 | 3.8024  |
| 37 | C    | -3.2193 | -3.2781 | 0.6169  |
| 38 | C    | -0.7725 | -3.0177 | -0.0029 |
| 39 | C    | 3.5152  | 2.1712  | 0.0306  |
| 40 | C    | 2.8624  | -0.2796 | -0.0876 |
| 41 | C    | 2.4755  | 3.6736  | 1.6186  |
| 42 | C    | 0.6858  | 2.8594  | 3.2241  |
| 43 | C    | -4.3245 | -2.9490 | 1.4028  |
| 44 | H    | -5.0636 | -1.7664 | 3.0476  |
| 45 | H    | -2.0678 | -0.6768 | 4.5415  |
| 46 | H    | -2.5023 | 0.5773  | 3.3842  |
| 47 | H    | -3.7719 | -0.2328 | 4.3260  |
| 48 | H    | -3.3218 | -3.9963 | -0.1927 |
| 49 | H    | 0.0867  | -3.3297 | 0.6026  |
| 50 | H    | -1.0048 | -3.8190 | -0.7111 |
| 51 | H    | -0.4586 | -2.1315 | -0.5690 |

|    |   |         |         |         |
|----|---|---------|---------|---------|
| 52 | C | 3.3849  | 3.4456  | 0.5849  |
| 53 | H | 4.2243  | 1.9978  | -0.7749 |
| 54 | H | 3.2002  | -1.0020 | 0.6660  |
| 55 | H | 1.8952  | -0.6376 | -0.4579 |
| 56 | H | 3.5787  | -0.2925 | -0.9148 |
| 57 | H | 2.3772  | 4.6672  | 2.0484  |
| 58 | H | 0.9206  | 2.2455  | 4.1025  |
| 59 | H | 0.6759  | 3.9088  | 3.5344  |
| 60 | H | -0.3255 | 2.5820  | 2.9069  |
| 61 | H | -5.2869 | -3.4138 | 1.2048  |
| 62 | H | 3.9941  | 4.2638  | 0.2095  |

large\_basis\_THFrad\_THFrad\_bb

Energy (POTENTIAL) = -231.874549871 Eh

|    | Atom | X       | Y       | Z       |
|----|------|---------|---------|---------|
| 1  | C    | 1.2816  | -0.0482 | -0.1502 |
| 2  | O    | 2.5667  | 0.4369  | 0.3069  |
| 3  | C    | 2.5281  | 1.8123  | 0.3583  |
| 4  | C    | 1.2491  | 2.3388  | -0.2178 |
| 5  | C    | 0.3136  | 1.1304  | -0.0038 |
| 6  | H    | 1.3881  | -0.3561 | -1.1995 |
| 7  | H    | 1.0149  | -0.9249 | 0.4474  |
| 8  | H    | 3.5036  | 2.2850  | 0.2737  |
| 9  | H    | 0.8954  | 3.2502  | 0.2780  |
| 10 | H    | 1.3394  | 2.5699  | -1.2946 |
| 11 | H    | -0.1066 | 1.1524  | 1.0078  |
| 12 | H    | -0.5102 | 1.0820  | -0.7215 |

large\_basis\_IMes\_IMes\_bb  
Energy (POTENTIAL) = -924.480889126 Eh

|    | Atom | X       | Y       | Z       |
|----|------|---------|---------|---------|
| 1  | C    | -0.5367 | 1.1347  | -0.0962 |
| 2  | C    | 0.5622  | 1.8897  | -0.3385 |
| 3  | C    | 1.1887  | -0.3205 | -0.5975 |
| 4  | N    | -0.1352 | -0.1932 | -0.2601 |
| 5  | N    | 1.5884  | 0.9905  | -0.6373 |
| 6  | H    | -1.5465 | 1.4058  | 0.1733  |
| 7  | H    | 0.7144  | 2.9586  | -0.3264 |
| 8  | C    | -1.0218 | -1.3078 | -0.0682 |
| 9  | C    | -1.8474 | -1.7165 | -1.1256 |
| 10 | C    | -1.0501 | -1.9444 | 1.1848  |
| 11 | C    | -2.7178 | -2.7918 | -0.9038 |
| 12 | C    | -1.9328 | -3.0136 | 1.3594  |
| 13 | C    | -2.7752 | -3.4506 | 0.3281  |
| 14 | H    | -3.3634 | -3.1200 | -1.7154 |
| 15 | H    | -1.9670 | -3.5177 | 2.3233  |
| 16 | C    | 2.9232  | 1.4092  | -0.9644 |
| 17 | C    | 3.8544  | 1.5947  | 0.0682  |
| 18 | C    | 3.2523  | 1.6379  | -2.3106 |
| 19 | C    | 5.1417  | 2.0252  | -0.2761 |
| 20 | C    | 4.5494  | 2.0666  | -2.6077 |
| 21 | C    | 5.5065  | 2.2688  | -1.6045 |
| 22 | H    | 5.8746  | 2.1725  | 0.5141  |
| 23 | H    | 4.8196  | 2.2457  | -3.6465 |
| 24 | C    | 3.4795  | 1.3282  | 1.5050  |
| 25 | H    | 2.6143  | 1.9271  | 1.8139  |
| 26 | H    | 3.2040  | 0.2772  | 1.6520  |
| 27 | H    | 4.3120  | 1.5593  | 2.1766  |
| 28 | C    | 2.2323  | 1.4109  | -3.3986 |
| 29 | H    | 1.3292  | 2.0112  | -3.2343 |
| 30 | H    | 2.6401  | 1.6682  | -4.3809 |
| 31 | H    | 1.9132  | 0.3623  | -3.4216 |
| 32 | C    | 6.8904  | 2.7625  | -1.9545 |
| 33 | H    | 6.8800  | 3.8379  | -2.1783 |
| 34 | H    | 7.5948  | 2.6038  | -1.1310 |
| 35 | H    | 7.2835  | 2.2534  | -2.8423 |
| 36 | C    | -1.7896 | -1.0271 | -2.4667 |
| 37 | H    | -1.9924 | 0.0470  | -2.3798 |
| 38 | H    | -0.7946 | -1.1245 | -2.9170 |
| 39 | H    | -2.5200 | -1.4557 | -3.1599 |
| 40 | C    | -0.1425 | -1.4874 | 2.2998  |
| 41 | H    | -0.2720 | -0.4190 | 2.5108  |
| 42 | H    | -0.3388 | -2.0451 | 3.2207  |
| 43 | H    | 0.9105  | -1.6293 | 2.0301  |
| 44 | C    | -3.7200 | -4.6067 | 0.5563  |
| 45 | H    | -4.4069 | -4.3986 | 1.3865  |
| 46 | H    | -4.3220 | -4.8183 | -0.3334 |
| 47 | H    | -3.1723 | -5.5214 | 0.8172  |

large\_basis\_TS-B-2x-3x-Cl\_NiIMes\_PhCl\_OATS\_bb

Energy (POTENTIAL) = -1785.79704549 Eh

|    | Atom | X       | Y       | Z       |
|----|------|---------|---------|---------|
| 1  | Ni   | -0.3376 | -0.3197 | 0.0893  |
| 2  | C    | 0.4161  | -1.0640 | 1.6681  |
| 3  | N    | 0.0615  | -2.1746 | 2.3867  |
| 4  | N    | 1.5984  | -0.6811 | 2.2439  |
| 5  | C    | 0.9983  | -2.4740 | 3.3732  |
| 6  | C    | -1.1266 | -2.9373 | 2.1226  |
| 7  | C    | 1.9692  | -1.5298 | 3.2827  |
| 8  | C    | 2.3552  | 0.4505  | 1.7828  |
| 9  | H    | 0.8864  | -3.3218 | 4.0311  |
| 10 | C    | -2.2214 | -2.8103 | 2.9945  |
| 11 | C    | -1.1638 | -3.7706 | 0.9941  |
| 12 | H    | 2.8779  | -1.3840 | 3.8463  |
| 13 | C    | 3.1761  | 0.3027  | 0.6520  |
| 14 | C    | 2.2177  | 1.6747  | 2.4511  |
| 15 | C    | -3.3715 | -3.5522 | 2.7125  |
| 16 | C    | -2.1674 | -1.8778 | 4.1798  |
| 17 | C    | -2.3403 | -4.4905 | 0.7515  |
| 18 | C    | 0.0098  | -3.8678 | 0.0506  |
| 19 | C    | 3.8738  | 1.4258  | 0.2016  |
| 20 | C    | 3.2586  | -1.0126 | -0.0804 |
| 21 | C    | 2.9417  | 2.7709  | 1.9662  |
| 22 | C    | 1.2879  | 1.8078  | 3.6314  |
| 23 | C    | -3.4493 | -4.3983 | 1.5984  |
| 24 | H    | -4.2312 | -3.4617 | 3.3732  |
| 25 | H    | -1.4303 | -2.2049 | 4.9233  |
| 26 | H    | -1.8808 | -0.8651 | 3.8719  |
| 27 | H    | -3.1414 | -1.8209 | 4.6750  |
| 28 | H    | -2.3876 | -5.1379 | -0.1212 |
| 29 | H    | 0.9567  | -3.9839 | 0.5900  |
| 30 | H    | -0.1072 | -4.7144 | -0.6329 |
| 31 | H    | 0.1000  | -2.9532 | -0.5506 |
| 32 | C    | 3.7709  | 2.6663  | 0.8446  |
| 33 | H    | 4.5054  | 1.3333  | -0.6794 |
| 34 | H    | 3.4534  | -1.8472 | 0.6033  |
| 35 | H    | 2.3063  | -1.2238 | -0.5829 |
| 36 | H    | 4.0485  | -0.9921 | -0.8372 |
| 37 | H    | 2.8443  | 3.7291  | 2.4715  |
| 38 | H    | 1.5765  | 1.1429  | 4.4545  |
| 39 | H    | 1.2794  | 2.8340  | 4.0111  |
| 40 | H    | 0.2624  | 1.5375  | 3.3492  |
| 41 | C    | -4.7039 | -5.1956 | 1.3335  |
| 42 | C    | 4.5296  | 3.8592  | 0.3142  |
| 43 | H    | -4.7082 | -5.6157 | 0.3225  |
| 44 | H    | -4.7993 | -6.0304 | 2.0408  |
| 45 | H    | -5.6006 | -4.5751 | 1.4480  |
| 46 | H    | 4.3600  | 4.7514  | 0.9256  |
| 47 | H    | 5.6097  | 3.6662  | 0.2909  |
| 48 | H    | 4.2246  | 4.0929  | -0.7141 |
| 49 | C    | -0.4266 | 1.7154  | -1.0314 |
| 50 | H    | -1.1123 | 2.1934  | -0.3384 |
| 51 | C    | -0.6817 | 0.4101  | -1.5294 |

|    |    |         |         |         |
|----|----|---------|---------|---------|
| 52 | C  | 0.1045  | -0.1575 | -2.5609 |
| 53 | H  | -0.1278 | -1.1495 | -2.9345 |
| 54 | C  | 0.6684  | 2.4255  | -1.5613 |
| 55 | H  | 0.8841  | 3.4236  | -1.1880 |
| 56 | C  | 1.1823  | 0.5747  | -3.0507 |
| 57 | H  | 1.8197  | 0.1376  | -3.8157 |
| 58 | C  | 1.4644  | 1.8626  | -2.5564 |
| 59 | H  | 2.3066  | 2.4202  | -2.9567 |
| 60 | Cl | -2.5255 | -0.3562 | -1.2535 |



large\_basis\_A-6-I\_NiITMe2\_bb  
 Energy (POTENTIAL) = -948.038890059 Eh

|    | Atom | X       | Y       | Z       |
|----|------|---------|---------|---------|
| 1  | C    | -0.4807 | 2.1421  | 1.1953  |
| 2  | C    | 0.0171  | 2.1135  | -0.0768 |
| 3  | C    | -0.1504 | 4.3065  | 0.5448  |
| 4  | N    | -0.5786 | 3.4882  | 1.5443  |
| 5  | N    | 0.2046  | 3.4448  | -0.4487 |
| 6  | C    | -1.0639 | 3.9573  | 2.8344  |
| 7  | H    | -1.0674 | 5.0474  | 2.8213  |
| 8  | H    | -2.0784 | 3.5871  | 3.0131  |
| 9  | H    | -0.4070 | 3.6137  | 3.6386  |
| 10 | C    | 0.7459  | 3.8582  | -1.7350 |
| 11 | H    | 0.1177  | 3.4883  | -2.5514 |
| 12 | H    | 0.7679  | 4.9495  | -1.7579 |
| 13 | H    | 1.7630  | 3.4752  | -1.8634 |
| 14 | C    | 0.3421  | 0.9746  | -0.9824 |
| 15 | H    | -0.2414 | 1.0142  | -1.9112 |
| 16 | H    | 1.4032  | 0.9729  | -1.2628 |
| 17 | H    | 0.1242  | 0.0229  | -0.4902 |
| 18 | C    | -0.8755 | 1.0434  | 2.1226  |
| 19 | H    | -0.7149 | 0.0704  | 1.6503  |
| 20 | H    | -0.2895 | 1.0687  | 3.0500  |
| 21 | H    | -1.9345 | 1.1111  | 2.4031  |
| 22 | C    | -0.0928 | 8.1796  | 0.2344  |
| 23 | N    | 0.8621  | 9.0131  | -0.2608 |
| 24 | N    | -1.1413 | 9.0082  | 0.4964  |
| 25 | C    | 0.4304  | 10.3381 | -0.2978 |
| 26 | C    | 2.1902  | 8.5799  | -0.6718 |
| 27 | C    | -0.8480 | 10.3356 | 0.1846  |
| 28 | C    | -2.4065 | 8.5703  | 1.0674  |
| 29 | C    | 1.2927  | 11.4496 | -0.7932 |
| 30 | H    | 2.2394  | 7.4948  | -0.5772 |
| 31 | H    | 2.3777  | 8.8677  | -1.7111 |
| 32 | H    | 2.9541  | 9.0274  | -0.0294 |
| 33 | C    | -1.8285 | 11.4415 | 0.3848  |
| 34 | H    | -3.2385 | 8.8470  | 0.4125  |
| 35 | H    | -2.3727 | 7.4843  | 1.1741  |
| 36 | H    | -2.5586 | 9.0235  | 2.0521  |
| 37 | H    | 0.7663  | 12.4045 | -0.7128 |
| 38 | H    | 2.2213  | 11.5270 | -0.2140 |
| 39 | H    | 1.5739  | 11.3074 | -1.8446 |
| 40 | H    | -2.7444 | 11.2806 | -0.1982 |
| 41 | H    | -2.1236 | 11.5345 | 1.4377  |
| 42 | H    | -1.3960 | 12.3958 | 0.0723  |
| 43 | Ni   | 0.0371  | 6.2556  | 0.5680  |
| 44 | I    | 2.0515  | 6.3979  | 2.6989  |

large\_basis\_D-3-Cl\_cis-NiClPhIPhen2\_bb  
Energy (POTENTIAL) = -2238.43288662 Eh

|    | Atom | X       | Y       | Z       |
|----|------|---------|---------|---------|
| 1  | C    | 0.0175  | -0.4341 | -0.9026 |
| 2  | C    | 0.0343  | 0.6442  | -1.7179 |
| 3  | C    | 2.1397  | -0.2484 | -1.7358 |
| 4  | N    | 1.3081  | -0.9623 | -0.9232 |
| 5  | N    | 1.3319  | 0.7509  | -2.2159 |
| 6  | Ni   | 3.9795  | -0.6287 | -2.3914 |
| 7  | C    | 3.5834  | -2.4372 | -2.7391 |
| 8  | N    | 4.0211  | -3.5779 | -2.1054 |
| 9  | N    | 2.8336  | -2.8985 | -3.7760 |
| 10 | C    | 3.5531  | -4.7159 | -2.7740 |
| 11 | C    | 2.8100  | -4.2889 | -3.8169 |
| 12 | H    | 3.8095  | -5.7175 | -2.4747 |
| 13 | H    | 2.2790  | -4.8279 | -4.5857 |
| 14 | H    | -0.7646 | -0.8644 | -0.2969 |
| 15 | H    | -0.7445 | 1.3336  | -2.0033 |
| 16 | C    | 2.1951  | -2.0728 | -4.7607 |
| 17 | C    | 0.8796  | -1.6542 | -4.5572 |
| 18 | C    | 2.8990  | -1.7236 | -5.9149 |
| 19 | C    | 0.2572  | -0.8717 | -5.5313 |
| 20 | C    | 2.2663  | -0.9434 | -6.8849 |
| 21 | C    | 0.9478  | -0.5197 | -6.6946 |
| 22 | H    | -0.7631 | -0.5327 | -5.3771 |
| 23 | H    | 2.8080  | -0.6613 | -7.7831 |
| 24 | C    | 4.8468  | -3.6539 | -0.9324 |
| 25 | C    | 5.6293  | -2.5677 | -0.5246 |
| 26 | C    | 4.8731  | -4.8397 | -0.1873 |
| 27 | C    | 6.4248  | -2.6709 | 0.6160  |
| 28 | C    | 5.6848  | -4.9380 | 0.9426  |
| 29 | C    | 6.4637  | -3.8553 | 1.3539  |
| 30 | H    | 7.0215  | -1.8146 | 0.9174  |
| 31 | H    | 5.6900  | -5.8646 | 1.5099  |
| 32 | C    | 1.6914  | -2.0405 | -0.0621 |
| 33 | C    | 1.0396  | -3.2699 | -0.1779 |
| 34 | C    | 2.6418  | -1.8197 | 0.9369  |
| 35 | C    | 1.3288  | -4.2850 | 0.7358  |
| 36 | C    | 2.9220  | -2.8392 | 1.8468  |
| 37 | C    | 2.2621  | -4.0669 | 1.7530  |
| 38 | H    | 0.8245  | -5.2434 | 0.6512  |
| 39 | H    | 3.6627  | -2.6752 | 2.6228  |
| 40 | C    | 1.7151  | 1.8112  | -3.1000 |
| 41 | C    | 1.3396  | 3.1205  | -2.7857 |
| 42 | C    | 2.4220  | 1.5376  | -4.2694 |
| 43 | C    | 1.6797  | 4.1601  | -3.6523 |
| 44 | C    | 2.7667  | 2.5832  | -5.1256 |
| 45 | C    | 2.3953  | 3.8953  | -4.8234 |
| 46 | H    | 1.3942  | 5.1784  | -3.4035 |
| 47 | H    | 3.3239  | 2.3630  | -6.0318 |
| 48 | C    | 5.5085  | -0.8406 | -3.6190 |
| 49 | C    | 5.6936  | 0.2418  | -4.5087 |
| 50 | C    | 6.3351  | -1.9602 | -3.8394 |
| 51 | C    | 6.6150  | 0.2000  | -5.5602 |

|    |    |        |         |         |
|----|----|--------|---------|---------|
| 52 | H  | 5.1043 | 1.1428  | -4.3724 |
| 53 | C  | 7.2737 | -2.0102 | -4.8784 |
| 54 | H  | 6.2557 | -2.8306 | -3.1929 |
| 55 | C  | 7.4124 | -0.9321 | -5.7553 |
| 56 | H  | 6.7144 | 1.0572  | -6.2247 |
| 57 | H  | 7.8917 | -2.8979 | -5.0048 |
| 58 | H  | 8.1330 | -0.9692 | -6.5693 |
| 59 | Cl | 4.7721 | 1.3647  | -1.5010 |
| 60 | H  | 0.8069 | 3.3244  | -1.8618 |
| 61 | H  | 2.6633 | 4.7074  | -5.4937 |
| 62 | H  | 2.7044 | 0.5204  | -4.5006 |
| 63 | H  | 0.3638 | -1.9269 | -3.6416 |
| 64 | H  | 0.4616 | 0.0930  | -7.4484 |
| 65 | H  | 3.9274 | -2.0479 | -6.0336 |
| 66 | H  | 3.1389 | -0.8578 | 0.9998  |
| 67 | H  | 0.3128 | -3.4208 | -0.9707 |
| 68 | H  | 2.4859 | -4.8579 | 2.4629  |
| 69 | H  | 7.0896 | -3.9328 | 2.2384  |
| 70 | H  | 5.6227 | -1.6430 | -1.0898 |
| 71 | H  | 4.2425 | -5.6797 | -0.4518 |

large\_basis\_A-3-Br\_cis-NiBrPhITMe2\_bb  
Energy (POTENTIAL) = -1181.53805248 Eh

|    | Atom | X       | Y       | Z       |
|----|------|---------|---------|---------|
| 1  | C    | 0.2820  | 0.4301  | -0.8177 |
| 2  | C    | 1.2376  | -0.0904 | 0.0055  |
| 3  | C    | -0.1083 | -1.8141 | -0.6556 |
| 4  | N    | -0.5258 | -0.6436 | -1.2053 |
| 5  | N    | 0.9721  | -1.4611 | 0.0883  |
| 6  | Ni   | -0.8218 | -3.6252 | -1.0145 |
| 7  | C    | 0.7431  | -4.0561 | -1.9718 |
| 8  | N    | 1.7508  | -4.8901 | -1.6079 |
| 9  | N    | 1.1129  | -3.5870 | -3.1912 |
| 10 | C    | 2.7489  | -4.9443 | -2.5876 |
| 11 | C    | 2.3453  | -4.1158 | -3.5923 |
| 12 | C    | -1.6869 | -5.7310 | -2.8807 |
| 13 | C    | -2.1867 | -6.9835 | -3.2604 |
| 14 | C    | -1.4758 | -5.3791 | -1.5315 |
| 15 | C    | -2.4672 | -7.9494 | -2.2903 |
| 16 | H    | -2.3475 | -7.2086 | -4.3140 |
| 17 | C    | -1.7730 | -6.3760 | -0.5788 |
| 18 | C    | -2.2520 | -7.6389 | -0.9428 |
| 19 | H    | -2.8458 | -8.9279 | -2.5780 |
| 20 | H    | -1.6472 | -6.1469 | 0.4776  |
| 21 | H    | -2.4678 | -8.3801 | -0.1743 |
| 22 | C    | -1.6989 | -0.5042 | -2.0557 |
| 23 | H    | -1.4089 | -0.1913 | -3.0638 |
| 24 | H    | -2.2089 | -1.4661 | -2.0948 |
| 25 | H    | -2.3829 | 0.2371  | -1.6329 |
| 26 | C    | 0.0289  | 1.8253  | -1.2790 |
| 27 | H    | 0.0438  | 1.8990  | -2.3740 |
| 28 | H    | -0.9487 | 2.1926  | -0.9411 |
| 29 | H    | 0.7933  | 2.5014  | -0.8865 |
| 30 | C    | 2.3651  | 0.5539  | 0.7387  |
| 31 | H    | 3.3314  | 0.1075  | 0.4716  |
| 32 | H    | 2.4113  | 1.6206  | 0.5033  |
| 33 | H    | 2.2495  | 0.4564  | 1.8260  |
| 34 | C    | 1.7620  | -2.4021 | 0.8679  |
| 35 | H    | 1.1910  | -3.3243 | 0.9633  |
| 36 | H    | 2.7172  | -2.6135 | 0.3756  |
| 37 | H    | 1.9532  | -1.9966 | 1.8650  |
| 38 | C    | 1.7631  | -5.6986 | -0.3974 |
| 39 | H    | 1.7820  | -6.7617 | -0.6547 |
| 40 | H    | 2.6385  | -5.4589 | 0.2135  |
| 41 | H    | 0.8544  | -5.4896 | 0.1649  |
| 42 | C    | 0.3403  | -2.6291 | -3.9689 |
| 43 | H    | 0.7778  | -1.6280 | -3.8979 |
| 44 | H    | 0.3120  | -2.9369 | -5.0169 |
| 45 | H    | -0.6752 | -2.6079 | -3.5761 |
| 46 | C    | 3.9647  | -5.7930 | -2.4357 |
| 47 | H    | 4.5392  | -5.5216 | -1.5406 |
| 48 | H    | 3.7078  | -6.8564 | -2.3485 |
| 49 | H    | 4.6197  | -5.6774 | -3.3034 |
| 50 | C    | 2.9825  | -3.7596 | -4.8924 |
| 51 | H    | 2.3671  | -4.0728 | -5.7456 |

|    |    |         |         |         |
|----|----|---------|---------|---------|
| 52 | H  | 3.1416  | -2.6775 | -4.9828 |
| 53 | H  | 3.9550  | -4.2505 | -4.9850 |
| 54 | H  | -1.4498 | -5.0094 | -3.6624 |
| 55 | Br | -2.8345 | -3.1358 | 0.3394  |

large\_basis\_A-2-Br\_NiITMe2\_eta2\_PhBr\_bb  
Energy (POTENTIAL) = -1181.46957691 Eh

|    | Atom | X       | Y       | Z       |
|----|------|---------|---------|---------|
| 1  | C    | -0.0788 | -0.2030 | 0.0575  |
| 2  | C    | 0.6201  | 0.0111  | -1.0943 |
| 3  | C    | -0.3188 | -2.0721 | -1.2399 |
| 4  | N    | -0.6444 | -1.4770 | -0.0598 |
| 5  | N    | 0.4543  | -1.1419 | -1.8692 |
| 6  | Ni   | -0.7211 | -3.8516 | -1.8588 |
| 7  | C    | 1.0476  | -4.6700 | -1.6261 |
| 8  | N    | 1.7991  | -4.8131 | -0.4982 |
| 9  | N    | 1.8950  | -5.0502 | -2.6243 |
| 10 | C    | 3.0925  | -5.2602 | -0.7809 |
| 11 | C    | 3.1531  | -5.4118 | -2.1361 |
| 12 | C    | -2.4200 | -3.8210 | -2.6442 |
| 13 | C    | -2.4460 | -3.3176 | -3.9972 |
| 14 | C    | -2.1740 | -5.2456 | -2.4815 |
| 15 | C    | -2.2700 | -4.1538 | -5.0759 |
| 16 | H    | -2.6011 | -2.2522 | -4.1475 |
| 17 | C    | -2.1047 | -6.0913 | -3.6348 |
| 18 | H    | -2.4090 | -5.7198 | -1.5289 |
| 19 | C    | -2.1259 | -5.5643 | -4.9062 |
| 20 | H    | -2.2486 | -3.7320 | -6.0795 |
| 21 | H    | -2.0528 | -7.1697 | -3.4896 |
| 22 | H    | -2.0495 | -6.2084 | -5.7786 |
| 23 | C    | -1.4779 | -2.0936 | 0.9599  |
| 24 | H    | -2.3114 | -1.4350 | 1.2189  |
| 25 | H    | -1.8793 | -3.0210 | 0.5522  |
| 26 | H    | -0.8929 | -2.3041 | 1.8621  |
| 27 | C    | -0.2932 | 0.6570  | 1.2571  |
| 28 | H    | -1.3534 | 0.9076  | 1.3924  |
| 29 | H    | 0.0432  | 0.1611  | 2.1768  |
| 30 | H    | 0.2610  | 1.5947  | 1.1599  |
| 31 | C    | 1.4184  | 1.1827  | -1.5569 |
| 32 | H    | 0.9975  | 1.6282  | -2.4678 |
| 33 | H    | 1.4366  | 1.9582  | -0.7861 |
| 34 | H    | 2.4571  | 0.9062  | -1.7798 |
| 35 | C    | 1.0698  | -1.3529 | -3.1710 |
| 36 | H    | 0.5857  | -2.2091 | -3.6426 |
| 37 | H    | 0.9310  | -0.4707 | -3.8021 |
| 38 | H    | 2.1420  | -1.5546 | -3.0684 |
| 39 | C    | 1.3197  | -4.4894 | 0.8363  |
| 40 | H    | 1.5166  | -5.3172 | 1.5238  |
| 41 | H    | 1.8080  | -3.5848 | 1.2149  |
| 42 | H    | 0.2451  | -4.3203 | 0.7751  |
| 43 | C    | 1.5332  | -5.0662 | -4.0339 |
| 44 | H    | 2.1299  | -4.3378 | -4.5930 |
| 45 | H    | 1.6979  | -6.0616 | -4.4578 |
| 46 | H    | 0.4761  | -4.8133 | -4.1203 |
| 47 | C    | 4.1126  | -5.4914 | 0.2822  |
| 48 | H    | 4.3050  | -4.5808 | 0.8639  |
| 49 | H    | 3.7949  | -6.2688 | 0.9893  |
| 50 | H    | 5.0591  | -5.8119 | -0.1620 |
| 51 | C    | 4.2562  | -5.8703 | -3.0285 |

|    |    |         |         |         |
|----|----|---------|---------|---------|
| 52 | H  | 3.9874  | -6.7892 | -3.5655 |
| 53 | H  | 4.5072  | -5.1139 | -3.7830 |
| 54 | H  | 5.1581  | -6.0752 | -2.4452 |
| 55 | Br | -4.1153 | -3.0233 | -1.5383 |

large\_basis\_TS-C-5-6-Cl\_NiIXy2\_ClPh\_spt  
Energy (POTENTIAL) = -2552.97818662 Eh

|    | Atom | X       | Y       | Z       |
|----|------|---------|---------|---------|
| 1  | C    | -0.5015 | 1.0308  | 0.0868  |
| 2  | C    | 0.5295  | 1.8151  | -0.3102 |
| 3  | C    | 1.2511  | -0.3593 | -0.4163 |
| 4  | N    | -0.0487 | -0.2849 | 0.0187  |
| 5  | N    | 1.5844  | 0.9556  | -0.6128 |
| 6  | Ni   | 2.3392  | -1.8911 | -0.6780 |
| 7  | C    | 3.4299  | -3.3497 | -1.2072 |
| 8  | N    | 4.7118  | -3.6584 | -0.8238 |
| 9  | N    | 3.1091  | -4.3745 | -2.0584 |
| 10 | C    | 5.1643  | -4.8344 | -1.4184 |
| 11 | C    | 4.1529  | -5.2883 | -2.1970 |
| 12 | H    | 6.1529  | -5.2247 | -1.2330 |
| 13 | H    | 4.0704  | -6.1594 | -2.8284 |
| 14 | H    | -1.5037 | 1.2748  | 0.4036  |
| 15 | H    | 0.6182  | 2.8862  | -0.4072 |
| 16 | C    | 1.8423  | -4.5260 | -2.7194 |
| 17 | C    | 0.7851  | -5.1316 | -2.0204 |
| 18 | C    | 1.7268  | -4.1054 | -4.0547 |
| 19 | C    | -0.4078 | -5.3596 | -2.7171 |
| 20 | C    | 0.5114  | -4.3392 | -4.7097 |
| 21 | C    | -0.5421 | -4.9751 | -4.0514 |
| 22 | H    | -1.2360 | -5.8382 | -2.2021 |
| 23 | H    | 0.3964  | -4.0235 | -5.7435 |
| 24 | C    | 5.5054  | -2.8641 | 0.0724  |
| 25 | C    | 6.0219  | -1.6417 | -0.3881 |
| 26 | C    | 5.7575  | -3.3529 | 1.3657  |
| 27 | C    | 6.7962  | -0.8844 | 0.5001  |
| 28 | C    | 6.5384  | -2.5643 | 2.2197  |
| 29 | C    | 7.0504  | -1.3380 | 1.7940  |
| 30 | H    | 7.2013  | 0.0664  | 0.1661  |
| 31 | H    | 6.7402  | -2.9181 | 3.2276  |
| 32 | C    | -0.8561 | -1.4246 | 0.3538  |
| 33 | C    | -1.3498 | -2.2289 | -0.6863 |
| 34 | C    | -1.1379 | -1.6788 | 1.7071  |
| 35 | C    | -2.1381 | -3.3334 | -0.3385 |
| 36 | C    | -1.9311 | -2.7924 | 2.0093  |
| 37 | C    | -2.4243 | -3.6164 | 0.9967  |
| 38 | H    | -2.5273 | -3.9712 | -1.1269 |
| 39 | H    | -2.1568 | -3.0128 | 3.0496  |
| 40 | C    | 2.8774  | 1.4154  | -1.0389 |
| 41 | C    | 3.8891  | 1.5598  | -0.0753 |
| 42 | C    | 3.0645  | 1.7442  | -2.3915 |
| 43 | C    | 5.1148  | 2.0905  | -0.4951 |
| 44 | C    | 4.3096  | 2.2603  | -2.7714 |
| 45 | C    | 5.3221  | 2.4448  | -1.8287 |
| 46 | H    | 5.9107  | 2.2198  | 0.2330  |
| 47 | H    | 4.4802  | 2.5214  | -3.8127 |
| 48 | C    | 2.8695  | -3.4014 | -4.7431 |
| 49 | H    | 3.1257  | -2.4727 | -4.2177 |
| 50 | H    | 3.7773  | -4.0162 | -4.7601 |
| 51 | H    | 2.6095  | -3.1497 | -5.7759 |



|    |    |         |         |         |
|----|----|---------|---------|---------|
| 52 | C  | 0.9252  | -5.4743 | -0.5605 |
| 53 | H  | 1.8038  | -6.1035 | -0.3723 |
| 54 | H  | 1.0574  | -4.5585 | 0.0283  |
| 55 | H  | 0.0387  | -5.9990 | -0.1922 |
| 56 | C  | 5.1981  | -4.6754 | 1.8272  |
| 57 | H  | 5.7154  | -5.5202 | 1.3546  |
| 58 | H  | 5.3034  | -4.7835 | 2.9106  |
| 59 | H  | 4.1358  | -4.7564 | 1.5789  |
| 60 | C  | 5.7348  | -1.1478 | -1.7823 |
| 61 | H  | 5.8738  | -1.9397 | -2.5275 |
| 62 | H  | 4.6929  | -0.8132 | -1.8587 |
| 63 | H  | 6.3839  | -0.3077 | -2.0413 |
| 64 | C  | 3.6608  | 1.1223  | 1.3480  |
| 65 | H  | 2.7897  | 1.6233  | 1.7888  |
| 66 | H  | 3.4616  | 0.0446  | 1.3860  |
| 67 | H  | 4.5343  | 1.3364  | 1.9706  |
| 68 | C  | 1.9634  | 1.5208  | -3.3981 |
| 69 | H  | 1.0657  | 2.1023  | -3.1556 |
| 70 | H  | 2.2893  | 1.8032  | -4.4038 |
| 71 | H  | 1.6629  | 0.4658  | -3.4173 |
| 72 | C  | -1.0205 | -1.9318 | -2.1264 |
| 73 | H  | -1.1379 | -0.8664 | -2.3561 |
| 74 | H  | 0.0240  | -2.1942 | -2.3376 |
| 75 | H  | -1.6607 | -2.5060 | -2.8006 |
| 76 | C  | -0.5953 | -0.7921 | 2.7995  |
| 77 | H  | -1.0892 | 0.1879  | 2.8075  |
| 78 | H  | -0.7453 | -1.2507 | 3.7812  |
| 79 | H  | 0.4769  | -0.6218 | 2.6646  |
| 80 | C  | 2.2938  | -3.1223 | 3.7109  |
| 81 | C  | 1.1590  | -3.7235 | 4.2404  |
| 82 | C  | 3.4208  | -2.8734 | 4.4839  |
| 83 | C  | 1.1535  | -4.0888 | 5.5938  |
| 84 | H  | 0.2887  | -3.9056 | 3.6123  |
| 85 | C  | 3.4117  | -3.2419 | 5.8363  |
| 86 | H  | 4.2974  | -2.4035 | 4.0419  |
| 87 | C  | 2.2786  | -3.8481 | 6.3905  |
| 88 | H  | 0.2726  | -4.5607 | 6.0256  |
| 89 | H  | 4.2871  | -3.0551 | 6.4559  |
| 90 | H  | 2.2725  | -4.1325 | 7.4398  |
| 91 | Cl | 2.3065  | -2.5685 | 1.7116  |
| 92 | H  | 6.2802  | 2.8551  | -2.1372 |
| 93 | H  | -1.4751 | -5.1611 | -4.5774 |
| 94 | H  | 7.6531  | -0.7376 | 2.4708  |
| 95 | H  | -3.0367 | -4.4784 | 1.2492  |

large\_basis\_NiCODITMe\_NiCODITMe\_bb  
Energy (POTENTIAL) = -865.091088505 Eh

|    | Atom | X       | Y       | Z       |
|----|------|---------|---------|---------|
| 1  | Ni   | 0.1638  | 0.0753  | -0.1678 |
| 2  | C    | -1.9572 | 1.0100  | 0.2136  |
| 3  | H    | -2.3082 | 0.4144  | 1.0573  |
| 4  | C    | -1.0248 | 1.9727  | 0.4753  |
| 5  | H    | -0.6846 | 2.0737  | 1.5045  |
| 6  | C    | -0.3125 | 0.3872  | -2.1224 |
| 7  | H    | -0.0862 | -0.5459 | -2.6468 |
| 8  | C    | 0.7968  | 1.1624  | -1.7374 |
| 9  | H    | 1.7905  | 0.8435  | -2.0584 |
| 10 | C    | -0.5342 | 3.0289  | -0.4960 |
| 11 | C    | -2.6452 | 0.7420  | -1.1076 |
| 12 | C    | -1.7287 | 0.9110  | -2.3469 |
| 13 | C    | 0.7301  | 2.6199  | -1.3141 |
| 14 | H    | -0.2956 | 3.9413  | 0.0644  |
| 15 | H    | -1.3429 | 3.2984  | -1.1810 |
| 16 | H    | 1.6228  | 2.8285  | -0.7103 |
| 17 | H    | 0.7993  | 3.2879  | -2.1893 |
| 18 | H    | -1.7034 | 1.9621  | -2.6530 |
| 19 | H    | -2.1875 | 0.3710  | -3.1853 |
| 20 | H    | -3.0071 | -0.2939 | -1.0815 |
| 21 | H    | -3.5439 | 1.3709  | -1.2199 |
| 22 | C    | 1.0829  | -0.6584 | 1.3449  |
| 23 | N    | 0.9839  | -1.9548 | 1.7847  |
| 24 | N    | 1.8533  | -0.0662 | 2.3118  |
| 25 | C    | 1.6599  | -2.1601 | 2.9910  |
| 26 | C    | 2.2169  | -0.9609 | 3.3236  |
| 27 | C    | 0.2137  | -2.9711 | 1.0886  |
| 28 | H    | -0.7569 | -3.1351 | 1.5710  |
| 29 | H    | 0.0481  | -2.6260 | 0.0637  |
| 30 | H    | 0.7631  | -3.9168 | 1.0624  |
| 31 | C    | 2.2471  | 1.3313  | 2.2812  |
| 32 | H    | 1.8729  | 1.7634  | 1.3524  |
| 33 | H    | 1.8226  | 1.8769  | 3.1312  |
| 34 | H    | 3.3378  | 1.4277  | 2.3090  |
| 35 | C    | 3.0602  | -0.5559 | 4.4855  |
| 36 | H    | 4.0622  | -0.2347 | 4.1714  |
| 37 | H    | 2.6116  | 0.2781  | 5.0409  |
| 38 | H    | 3.1816  | -1.3926 | 5.1794  |
| 39 | C    | 1.6936  | -3.4845 | 3.6765  |
| 40 | H    | 0.6824  | -3.8570 | 3.8857  |
| 41 | H    | 2.2014  | -4.2466 | 3.0707  |
| 42 | H    | 2.2263  | -3.4088 | 4.6286  |

large\_basis\_B-3-Br\_tetNiBrPhIMes2\_bb  
Energy (POTENTIAL) = -2263.32738065 Eh

|    | Atom | X       | Y       | Z       |
|----|------|---------|---------|---------|
| 1  | C    | 0.5070  | 0.4289  | -0.0899 |
| 2  | C    | 0.7096  | 1.4758  | -0.9167 |
| 3  | C    | 2.2392  | -0.1442 | -1.4812 |
| 4  | N    | 1.4295  | -0.5540 | -0.4559 |
| 5  | N    | 1.7549  | 1.1169  | -1.7586 |
| 6  | Ni   | 3.9851  | -0.6930 | -2.4270 |
| 7  | C    | 3.9768  | -2.5231 | -3.0088 |
| 8  | N    | 4.8192  | -3.4543 | -2.4343 |
| 9  | N    | 3.6142  | -3.1056 | -4.1983 |
| 10 | C    | 5.0005  | -4.5519 | -3.2780 |
| 11 | C    | 4.2454  | -4.3365 | -4.3770 |
| 12 | H    | 5.6294  | -5.3812 | -2.9938 |
| 13 | H    | 4.0752  | -4.9341 | -5.2589 |
| 14 | H    | -0.1977 | 0.2723  | 0.7112  |
| 15 | H    | 0.2213  | 2.4345  | -0.9941 |
| 16 | C    | 2.5051  | -2.7312 | -5.0469 |
| 17 | C    | 1.2271  | -3.1714 | -4.6449 |
| 18 | C    | 2.7030  | -2.0848 | -6.2761 |
| 19 | C    | 0.1338  | -2.8788 | -5.4620 |
| 20 | C    | 1.5736  | -1.8253 | -7.0662 |
| 21 | C    | 0.2861  | -2.1975 | -6.6759 |
| 22 | H    | -0.8563 | -3.2052 | -5.1511 |
| 23 | H    | 1.7146  | -1.3181 | -8.0181 |
| 24 | C    | 5.2469  | -3.5445 | -1.0483 |
| 25 | C    | 6.4379  | -2.9500 | -0.5949 |
| 26 | C    | 4.4887  | -4.3872 | -0.2103 |
| 27 | C    | 6.8046  | -3.1517 | 0.7420  |
| 28 | C    | 4.9210  | -4.5842 | 1.1046  |
| 29 | C    | 6.0620  | -3.9563 | 1.6094  |
| 30 | H    | 7.7152  | -2.6793 | 1.1034  |
| 31 | H    | 4.3416  | -5.2387 | 1.7505  |
| 32 | C    | 1.3312  | -1.8458 | 0.1729  |
| 33 | C    | 0.2077  | -2.6354 | -0.1365 |
| 34 | C    | 2.2287  | -2.1960 | 1.1924  |
| 35 | C    | 0.0152  | -3.8155 | 0.5897  |
| 36 | C    | 1.9731  | -3.3691 | 1.9100  |
| 37 | C    | 0.8801  | -4.1923 | 1.6226  |
| 38 | H    | -0.8413 | -4.4432 | 0.3535  |
| 39 | H    | 2.6531  | -3.6468 | 2.7107  |
| 40 | C    | 2.1661  | 1.9785  | -2.8356 |
| 41 | C    | 2.8265  | 3.1856  | -2.5622 |
| 42 | C    | 1.7947  | 1.6180  | -4.1440 |
| 43 | C    | 3.2141  | 3.9757  | -3.6545 |
| 44 | C    | 2.2008  | 2.4382  | -5.1971 |
| 45 | C    | 2.9338  | 3.6111  | -4.9737 |
| 46 | H    | 3.7522  | 4.9012  | -3.4607 |
| 47 | H    | 1.9363  | 2.1575  | -6.2144 |
| 48 | C    | 4.0611  | -1.6642 | -6.7701 |
| 49 | H    | 4.3435  | -0.6911 | -6.3564 |
| 50 | H    | 4.8401  | -2.3698 | -6.4757 |
| 51 | H    | 4.0606  | -1.5812 | -7.8621 |

|     |   |         |         |         |
|-----|---|---------|---------|---------|
| 52  | C | 1.0458  | -3.9612 | -3.3759 |
| 53  | H | -0.0032 | -4.2312 | -3.2302 |
| 54  | H | 1.6355  | -4.8853 | -3.3958 |
| 55  | H | 1.3761  | -3.3926 | -2.5041 |
| 56  | C | -0.9158 | -1.8575 | -7.5228 |
| 57  | H | -0.6354 | -1.6646 | -8.5637 |
| 58  | H | -1.6577 | -2.6642 | -7.5101 |
| 59  | H | -1.4143 | -0.9547 | -7.1440 |
| 60  | C | 3.2319  | -5.0673 | -0.6896 |
| 61  | H | 3.3981  | -5.6502 | -1.6013 |
| 62  | H | 2.8440  | -5.7421 | 0.0773  |
| 63  | H | 2.4543  | -4.3319 | -0.9091 |
| 64  | C | 7.3437  | -2.1514 | -1.4889 |
| 65  | H | 8.2384  | -1.8381 | -0.9419 |
| 66  | H | 7.6670  | -2.7405 | -2.3540 |
| 67  | H | 6.8397  | -1.2571 | -1.8580 |
| 68  | C | 6.4648  | -4.1266 | 3.0536  |
| 69  | H | 7.5490  | -4.0387 | 3.1841  |
| 70  | H | 5.9987  | -3.3540 | 3.6805  |
| 71  | H | 6.1483  | -5.0991 | 3.4473  |
| 72  | C | 3.0702  | 3.6833  | -1.1595 |
| 73  | H | 3.1388  | 2.8680  | -0.4394 |
| 74  | H | 4.0042  | 4.2515  | -1.1097 |
| 75  | H | 2.2583  | 4.3561  | -0.8489 |
| 76  | C | 0.9609  | 0.3914  | -4.3954 |
| 77  | H | 0.0711  | 0.3757  | -3.7537 |
| 78  | H | 0.6350  | 0.3494  | -5.4365 |
| 79  | H | 1.5277  | -0.5165 | -4.1824 |
| 80  | C | 3.4115  | 4.4463  | -6.1365 |
| 81  | H | 2.6099  | 4.6153  | -6.8659 |
| 82  | H | 3.7848  | 5.4217  | -5.8073 |
| 83  | H | 4.2275  | 3.9397  | -6.6689 |
| 84  | C | -0.8022 | -2.2109 | -1.1772 |
| 85  | H | -0.3300 | -1.7567 | -2.0531 |
| 86  | H | -1.3934 | -3.0684 | -1.5121 |
| 87  | H | -1.5013 | -1.4702 | -0.7686 |
| 88  | C | 3.4224  | -1.3352 | 1.5035  |
| 89  | H | 3.1289  | -0.2992 | 1.7080  |
| 90  | H | 3.9643  | -1.7209 | 2.3715  |
| 91  | H | 4.1108  | -1.2919 | 0.6541  |
| 92  | C | 0.6717  | -5.4837 | 2.3749  |
| 93  | H | 1.0361  | -5.4123 | 3.4058  |
| 94  | H | -0.3856 | -5.7696 | 2.4025  |
| 95  | H | 1.2187  | -6.3066 | 1.8935  |
| 96  | C | 5.3443  | -0.4248 | -3.7901 |
| 97  | C | 5.2814  | 0.8909  | -4.2956 |
| 98  | C | 6.2806  | -1.2752 | -4.4006 |
| 99  | C | 6.0905  | 1.3247  | -5.3516 |
| 100 | H | 4.6055  | 1.6060  | -3.8446 |
| 101 | C | 7.1194  | -0.8457 | -5.4359 |
| 102 | H | 6.3679  | -2.3072 | -4.0821 |
| 103 | C | 7.0254  | 0.4578  | -5.9264 |
| 104 | H | 6.0020  | 2.3505  | -5.7061 |
| 105 | H | 7.8350  | -1.5417 | -5.8711 |
| 106 | H | 7.6680  | 0.7936  | -6.7372 |

107

Br

5.2111

0.8919

-0.9075

large\_basis\_C-6-Cl\_NiClIXy2\_bb  
 Energy (POTENTIAL) = -2321.37875378 Eh

|    | Atom | X       | Y       | Z       |
|----|------|---------|---------|---------|
| 1  | C    | -0.0216 | 0.0559  | -0.2288 |
| 2  | C    | 1.1247  | 0.7671  | -0.3566 |
| 3  | C    | 1.6841  | -1.4487 | -0.4747 |
| 4  | N    | 0.3371  | -1.2874 | -0.3034 |
| 5  | N    | 2.1493  | -0.1644 | -0.5084 |
| 6  | Ni   | 2.7093  | -3.1067 | -0.5872 |
| 7  | C    | 3.7348  | -4.6145 | -1.2817 |
| 8  | N    | 5.0839  | -4.8259 | -1.2342 |
| 9  | N    | 3.2617  | -5.7446 | -1.8843 |
| 10 | C    | 5.4377  | -6.0535 | -1.7900 |
| 11 | C    | 4.2849  | -6.6355 | -2.2007 |
| 12 | H    | 6.4637  | -6.3841 | -1.8378 |
| 13 | H    | 4.0899  | -7.5818 | -2.6815 |
| 14 | H    | -1.0464 | 0.3662  | -0.0951 |
| 15 | H    | 1.3152  | 1.8293  | -0.3553 |
| 16 | C    | 1.8848  | -5.9884 | -2.2177 |
| 17 | C    | 1.0839  | -6.6988 | -1.3103 |
| 18 | C    | 1.4171  | -5.5484 | -3.4660 |
| 19 | C    | -0.2236 | -7.0065 | -1.7054 |
| 20 | C    | 0.1046  | -5.8788 | -3.8225 |
| 21 | C    | -0.7041 | -6.6135 | -2.9546 |
| 22 | H    | -0.8671 | -7.5544 | -1.0223 |
| 23 | H    | -0.2811 | -5.5559 | -4.7860 |
| 24 | C    | 6.0520  | -3.8785 | -0.7506 |
| 25 | C    | 6.4262  | -2.8214 | -1.5963 |
| 26 | C    | 6.6216  | -4.0769 | 0.5175  |
| 27 | C    | 7.4248  | -1.9513 | -1.1467 |
| 28 | C    | 7.6075  | -3.1730 | 0.9334  |
| 29 | C    | 8.0098  | -2.1235 | 0.1078  |
| 30 | H    | 7.7329  | -1.1276 | -1.7830 |
| 31 | H    | 8.0606  | -3.2997 | 1.9134  |
| 32 | C    | -0.6229 | -2.3569 | -0.2517 |
| 33 | C    | -1.0735 | -2.9061 | -1.4627 |
| 34 | C    | -1.1099 | -2.7669 | 0.9995  |
| 35 | C    | -2.0509 | -3.9051 | -1.3984 |
| 36 | C    | -2.0791 | -3.7777 | 1.0177  |
| 37 | C    | -2.5482 | -4.3395 | -0.1697 |
| 38 | H    | -2.4176 | -4.3457 | -2.3201 |
| 39 | H    | -2.4673 | -4.1200 | 1.9735  |
| 40 | C    | 3.5241  | 0.2197  | -0.6821 |
| 41 | C    | 4.3379  | 0.3383  | 0.4558  |
| 42 | C    | 3.9759  | 0.5190  | -1.9771 |
| 43 | C    | 5.6431  | 0.8099  | 0.2717  |
| 44 | C    | 5.2868  | 0.9911  | -2.1161 |
| 45 | C    | 6.1086  | 1.1465  | -0.9995 |
| 46 | H    | 6.2960  | 0.9104  | 1.1344  |
| 47 | H    | 5.6599  | 1.2359  | -3.1072 |
| 48 | C    | 2.3004  | -4.7258 | -4.3699 |
| 49 | H    | 2.6377  | -3.8168 | -3.8564 |
| 50 | H    | 3.2029  | -5.2749 | -4.6660 |
| 51 | H    | 1.7661  | -4.4301 | -5.2778 |

|    |    |         |         |         |
|----|----|---------|---------|---------|
| 52 | C  | 1.6173  | -7.0889 | 0.0440  |
| 53 | H  | 2.5230  | -7.7025 | -0.0395 |
| 54 | H  | 1.8873  | -6.1954 | 0.6219  |
| 55 | H  | 0.8705  | -7.6549 | 0.6093  |
| 56 | C  | 6.1637  | -5.2041 | 1.4074  |
| 57 | H  | 6.2713  | -6.1805 | 0.9201  |
| 58 | H  | 6.7404  | -5.2238 | 2.3375  |
| 59 | H  | 5.1036  | -5.0762 | 1.6591  |
| 60 | C  | 5.7550  | -2.6222 | -2.9316 |
| 61 | H  | 5.7787  | -3.5356 | -3.5381 |
| 62 | H  | 4.7004  | -2.3570 | -2.7908 |
| 63 | H  | 6.2375  | -1.8195 | -3.4966 |
| 64 | C  | 3.8128  | -0.0359 | 1.8173  |
| 65 | H  | 2.9085  | 0.5320  | 2.0698  |
| 66 | H  | 3.5419  | -1.0988 | 1.8489  |
| 67 | H  | 4.5633  | 0.1539  | 2.5909  |
| 68 | C  | 3.0809  | 0.3179  | -3.1744 |
| 69 | H  | 2.1538  | 0.8979  | -3.0921 |
| 70 | H  | 3.5892  | 0.6145  | -4.0968 |
| 71 | H  | 2.7871  | -0.7348 | -3.2698 |
| 72 | C  | -0.5089 | -2.4378 | -2.7801 |
| 73 | H  | -0.5852 | -1.3486 | -2.8865 |
| 74 | H  | 0.5548  | -2.6928 | -2.8550 |
| 75 | H  | -1.0327 | -2.9038 | -3.6195 |
| 76 | C  | -0.5876 | -2.1539 | 2.2736  |
| 77 | H  | -0.7344 | -1.0671 | 2.2923  |
| 78 | H  | -1.0941 | -2.5795 | 3.1456  |
| 79 | H  | 0.4878  | -2.3447 | 2.3703  |
| 80 | C1 | 2.7200  | -3.7715 | 1.7631  |
| 81 | H  | -3.3043 | -5.1199 | -0.1378 |
| 82 | H  | 7.1225  | 1.5184  | -1.1218 |
| 83 | H  | 8.7802  | -1.4344 | 0.4444  |
| 84 | H  | -1.7196 | -6.8679 | -3.2467 |

large\_basis\_D-5-Cl\_NiIPhen2\_ClPh\_bb  
Energy (POTENTIAL) = -2238.35062724 Eh

|    | Atom | X       | Y       | Z       |
|----|------|---------|---------|---------|
| 1  | C    | -0.6139 | 0.9118  | 0.0203  |
| 2  | C    | 0.1745  | 1.5950  | -0.8385 |
| 3  | C    | 1.1717  | -0.4576 | -0.4921 |
| 4  | N    | -0.0094 | -0.3316 | 0.2222  |
| 5  | N    | 1.2541  | 0.7662  | -1.1376 |
| 6  | Ni   | 2.3596  | -1.8788 | -0.7236 |
| 7  | C    | 3.5564  | -3.2117 | -1.2458 |
| 8  | N    | 4.7202  | -3.6972 | -0.6690 |
| 9  | N    | 3.5090  | -3.9134 | -2.4408 |
| 10 | C    | 5.3498  | -4.6461 | -1.4783 |
| 11 | C    | 4.5942  | -4.7751 | -2.5906 |
| 12 | H    | 6.2788  | -5.1164 | -1.1971 |
| 13 | H    | 4.7120  | -5.4043 | -3.4590 |
| 14 | H    | -1.5505 | 1.1775  | 0.4851  |
| 15 | H    | 0.0841  | 2.5890  | -1.2484 |
| 16 | C    | 2.4924  | -3.7614 | -3.4281 |
| 17 | C    | 1.1442  | -3.7715 | -3.0533 |
| 18 | C    | 2.8509  | -3.6113 | -4.7710 |
| 19 | C    | 0.1568  | -3.6114 | -4.0255 |
| 20 | C    | 1.8550  | -3.4630 | -5.7396 |
| 21 | C    | 0.5077  | -3.4560 | -5.3703 |
| 22 | H    | -0.8890 | -3.6185 | -3.7302 |
| 23 | H    | 2.1373  | -3.3409 | -6.7818 |
| 24 | C    | 5.2685  | -3.2663 | 0.5737  |
| 25 | C    | 5.2769  | -1.9077 | 0.9076  |
| 26 | C    | 5.8302  | -4.2072 | 1.4439  |
| 27 | C    | 5.8408  | -1.4957 | 2.1145  |
| 28 | C    | 6.4084  | -3.7841 | 2.6423  |
| 29 | C    | 6.4146  | -2.4284 | 2.9835  |
| 30 | H    | 5.8399  | -0.4394 | 2.3697  |
| 31 | H    | 6.8431  | -4.5192 | 3.3142  |
| 32 | C    | -0.6032 | -1.3533 | 1.0186  |
| 33 | C    | -0.6267 | -2.6761 | 0.5634  |
| 34 | C    | -1.1971 | -1.0193 | 2.2405  |
| 35 | C    | -1.2389 | -3.6623 | 1.3362  |
| 36 | C    | -1.8228 | -2.0102 | 2.9998  |
| 37 | C    | -1.8446 | -3.3346 | 2.5527  |
| 38 | H    | -1.2507 | -4.6884 | 0.9786  |
| 39 | H    | -2.2833 | -1.7453 | 3.9477  |
| 40 | C    | 2.2848  | 1.1252  | -2.0547 |
| 41 | C    | 3.6281  | 0.9519  | -1.7048 |
| 42 | C    | 1.9410  | 1.6527  | -3.3027 |
| 43 | C    | 4.6271  | 1.2954  | -2.6159 |
| 44 | C    | 2.9480  | 2.0025  | -4.2058 |
| 45 | C    | 4.2913  | 1.8194  | -3.8684 |
| 46 | H    | 5.6698  | 1.1602  | -2.3411 |
| 47 | H    | 2.6779  | 2.4061  | -5.1778 |
| 48 | C    | 2.2525  | -3.3221 | 4.4830  |
| 49 | C    | 1.0241  | -3.4171 | 5.1385  |
| 50 | C    | 3.4546  | -3.5602 | 5.1508  |
| 51 | C    | 1.0056  | -3.7583 | 6.4931  |



|    |    |         |         |         |
|----|----|---------|---------|---------|
| 52 | H  | 0.1041  | -3.2272 | 4.5961  |
| 53 | C  | 3.4189  | -3.9008 | 6.5053  |
| 54 | H  | 4.3960  | -3.4782 | 4.6183  |
| 55 | C  | 2.1987  | -4.0008 | 7.1792  |
| 56 | H  | 0.0525  | -3.8341 | 7.0100  |
| 57 | H  | 4.3512  | -4.0872 | 7.0321  |
| 58 | H  | 2.1779  | -4.2658 | 8.2327  |
| 59 | Cl | 2.2864  | -2.8894 | 2.7724  |
| 60 | H  | 6.8604  | -2.1023 | 3.9192  |
| 61 | H  | 5.0724  | 2.0866  | -4.5749 |
| 62 | H  | 0.8942  | 1.7664  | -3.5690 |
| 63 | H  | -0.2643 | -3.3345 | -6.1253 |
| 64 | H  | 3.9001  | -3.5881 | -5.0501 |
| 65 | H  | -2.3280 | -4.1043 | 3.1481  |
| 66 | H  | -0.1679 | -2.9130 | -0.3889 |
| 67 | H  | -1.1576 | 0.0048  | 2.5992  |
| 68 | H  | 0.8892  | -3.9142 | -2.0103 |
| 69 | H  | 3.8716  | 0.5631  | -0.7236 |
| 70 | H  | 4.8398  | -1.1944 | 0.2191  |
| 71 | H  | 5.8012  | -5.2631 | 1.1921  |

large\_basis\_A-4-Cl\_trans-NiClPhITMe2\_bb  
 Energy (POTENTIAL) = -1628.59992083 Eh

|    | Atom | X       | Y       | Z       |
|----|------|---------|---------|---------|
| 1  | C    | -0.6766 | 2.1781  | 1.0221  |
| 2  | C    | 0.2302  | 2.1182  | 0.0049  |
| 3  | C    | -0.0865 | 4.3203  | 0.5073  |
| 4  | N    | -0.8519 | 3.5363  | 1.3078  |
| 5  | N    | 0.5756  | 3.4419  | -0.2873 |
| 6  | C    | -1.7559 | 4.0454  | 2.3270  |
| 7  | H    | -1.6366 | 5.1280  | 2.3775  |
| 8  | H    | -2.7934 | 3.8040  | 2.0754  |
| 9  | H    | -1.5122 | 3.6137  | 3.3024  |
| 10 | C    | 1.5085  | 3.8310  | -1.3334 |
| 11 | H    | 1.0971  | 3.6019  | -2.3215 |
| 12 | H    | 1.6793  | 4.9049  | -1.2541 |
| 13 | H    | 2.4600  | 3.3064  | -1.2066 |
| 14 | C    | 0.8269  | 0.9601  | -0.7200 |
| 15 | H    | 0.6320  | 1.0133  | -1.7988 |
| 16 | H    | 1.9155  | 0.9165  | -0.5854 |
| 17 | H    | 0.4066  | 0.0214  | -0.3489 |
| 18 | C    | -1.3971 | 1.1075  | 1.7686  |
| 19 | H    | -1.1272 | 0.1230  | 1.3769  |
| 20 | H    | -1.1499 | 1.1229  | 2.8381  |
| 21 | H    | -2.4859 | 1.2168  | 1.6836  |
| 22 | C    | -0.1198 | 8.1733  | 0.2642  |
| 23 | N    | 0.6380  | 8.9612  | -0.5394 |
| 24 | N    | -0.9909 | 9.0330  | 0.8503  |
| 25 | C    | 0.2486  | 10.3026 | -0.4656 |
| 26 | C    | 1.7139  | 8.4686  | -1.3852 |
| 27 | C    | -0.7887 | 10.3483 | 0.4190  |
| 28 | C    | -2.0255 | 8.6324  | 1.7907  |
| 29 | C    | 0.9257  | 11.3740 | -1.2509 |
| 30 | H    | 1.8634  | 7.4112  | -1.1649 |
| 31 | H    | 1.4578  | 8.5882  | -2.4428 |
| 32 | H    | 2.6404  | 9.0113  | -1.1755 |
| 33 | C    | -1.6085 | 11.4872 | 0.9225  |
| 34 | H    | -3.0194 | 8.7906  | 1.3605  |
| 35 | H    | -1.8915 | 7.5730  | 2.0103  |
| 36 | H    | -1.9382 | 9.2049  | 2.7188  |
| 37 | H    | 0.4356  | 12.3368 | -1.0823 |
| 38 | H    | 1.9812  | 11.4800 | -0.9686 |
| 39 | H    | 0.8950  | 11.1654 | -2.3279 |
| 40 | H    | -2.6763 | 11.3407 | 0.7156  |
| 41 | H    | -1.4997 | 11.6162 | 2.0072  |
| 42 | H    | -1.2986 | 12.4198 | 0.4429  |
| 43 | Ni   | -0.0349 | 6.2504  | 0.4454  |
| 44 | C    | -1.3755 | 6.1492  | -0.9023 |
| 45 | C    | -1.0404 | 6.1646  | -2.2714 |
| 46 | C    | -2.7462 | 6.0499  | -0.5908 |
| 47 | C    | -2.0138 | 6.0801  | -3.2735 |
| 48 | H    | 0.0042  | 6.2462  | -2.5654 |
| 49 | C    | -3.7280 | 5.9693  | -1.5852 |
| 50 | H    | -3.0583 | 6.0322  | 0.4515  |
| 51 | C    | -3.3670 | 5.9823  | -2.9358 |

|    |    |         |        |         |
|----|----|---------|--------|---------|
| 52 | H  | -1.7148 | 6.0928 | -4.3205 |
| 53 | H  | -4.7775 | 5.8948 | -1.3044 |
| 54 | H  | -4.1267 | 5.9184 | -3.7113 |
| 55 | Cl | 1.6545  | 6.3679 | 2.0756  |

large\_basis\_B-2-Br\_NiIMes2\_eta2\_PhBr\_bb  
Energy (POTENTIAL) = -2263.26770899 Eh

|    | Atom | X       | Y       | Z       |
|----|------|---------|---------|---------|
| 1  | C    | 0.4076  | 0.5604  | 0.0000  |
| 2  | C    | 1.4062  | 0.8473  | -0.8561 |
| 3  | C    | 1.1334  | -1.4530 | -0.8813 |
| 4  | N    | 0.2338  | -0.8234 | -0.0308 |
| 5  | N    | 1.8405  | -0.3697 | -1.3792 |
| 6  | Ni   | 1.3266  | -3.3446 | -1.4900 |
| 7  | C    | 3.0322  | -4.4894 | -1.3712 |
| 8  | N    | 3.7701  | -4.7919 | -0.2420 |
| 9  | N    | 3.4684  | -5.4701 | -2.2513 |
| 10 | C    | 4.5957  | -5.9025 | -0.4151 |
| 11 | C    | 4.4102  | -6.3240 | -1.6825 |
| 12 | H    | 5.2368  | -6.2626 | 0.3745  |
| 13 | H    | 4.8502  | -7.1363 | -2.2399 |
| 14 | H    | -0.2039 | 1.1934  | 0.6235  |
| 15 | H    | 1.8518  | 1.7846  | -1.1496 |
| 16 | C    | 3.1621  | -5.5927 | -3.6481 |
| 17 | C    | 2.5087  | -6.7425 | -4.1173 |
| 18 | C    | 3.6449  | -4.6070 | -4.5279 |
| 19 | C    | 2.2851  | -6.8543 | -5.4973 |
| 20 | C    | 3.3821  | -4.7537 | -5.8914 |
| 21 | C    | 2.6958  | -5.8669 | -6.3962 |
| 22 | H    | 1.7641  | -7.7333 | -5.8708 |
| 23 | H    | 3.7410  | -3.9916 | -6.5801 |
| 24 | C    | 3.9496  | -3.9870 | 0.9355  |
| 25 | C    | 4.8993  | -2.9529 | 0.8798  |
| 26 | C    | 3.3358  | -4.3670 | 2.1358  |
| 27 | C    | 5.1519  | -2.2294 | 2.0491  |
| 28 | C    | 3.6345  | -3.6275 | 3.2865  |
| 29 | C    | 4.5199  | -2.5450 | 3.2591  |
| 30 | H    | 5.8761  | -1.4182 | 2.0205  |
| 31 | H    | 3.1571  | -3.9025 | 4.2243  |
| 32 | C    | -0.8775 | -1.3726 | 0.7021  |
| 33 | C    | -2.1801 | -1.0174 | 0.3083  |
| 34 | C    | -0.6433 | -2.1159 | 1.8664  |
| 35 | C    | -3.2505 | -1.4644 | 1.0934  |
| 36 | C    | -1.7402 | -2.5301 | 2.6244  |
| 37 | C    | -3.0527 | -2.2224 | 2.2514  |
| 38 | H    | -4.2635 | -1.2075 | 0.7903  |
| 39 | H    | -1.5634 | -3.1129 | 3.5262  |
| 40 | C    | 2.8446  | -0.3566 | -2.4069 |
| 41 | C    | 4.1574  | 0.0039  | -2.0648 |
| 42 | C    | 2.4458  | -0.5069 | -3.7477 |
| 43 | C    | 5.0976  | 0.1233  | -3.0972 |
| 44 | C    | 3.4131  | -0.3558 | -4.7435 |
| 45 | C    | 4.7466  | -0.0554 | -4.4382 |
| 46 | H    | 6.1233  | 0.3822  | -2.8432 |
| 47 | H    | 3.1179  | -0.4765 | -5.7836 |
| 48 | C    | 4.4774  | -3.4609 | -4.0161 |
| 49 | H    | 3.8907  | -2.7930 | -3.3821 |
| 50 | H    | 5.3137  | -3.8286 | -3.4093 |
| 51 | H    | 4.8855  | -2.8780 | -4.8446 |

|     |   |         |         |         |
|-----|---|---------|---------|---------|
| 52  | C | 2.0561  | -7.8532 | -3.1981 |
| 53  | H | 2.8113  | -8.6483 | -3.1402 |
| 54  | H | 1.8763  | -7.5047 | -2.1776 |
| 55  | H | 1.1329  | -8.3084 | -3.5719 |
| 56  | C | 2.3974  | -5.9793 | -7.8720 |
| 57  | H | 3.2591  | -5.6782 | -8.4796 |
| 58  | H | 2.1234  | -7.0022 | -8.1514 |
| 59  | H | 1.5612  | -5.3248 | -8.1526 |
| 60  | C | 2.3950  | -5.5436 | 2.1808  |
| 61  | H | 2.9268  | -6.4844 | 1.9881  |
| 62  | H | 1.9138  | -5.6246 | 3.1603  |
| 63  | H | 1.6132  | -5.4554 | 1.4193  |
| 64  | C | 5.6716  | -2.6954 | -0.3894 |
| 65  | H | 6.2113  | -3.5980 | -0.7026 |
| 66  | H | 5.0092  | -2.4178 | -1.2135 |
| 67  | H | 6.4042  | -1.8969 | -0.2493 |
| 68  | C | 4.7837  | -1.7292 | 4.5019  |
| 69  | H | 4.0887  | -0.8809 | 4.5689  |
| 70  | H | 4.6543  | -2.3266 | 5.4111  |
| 71  | H | 5.7990  | -1.3171 | 4.5042  |
| 72  | C | 4.5375  | 0.3293  | -0.6411 |
| 73  | H | 4.1858  | 1.3313  | -0.3634 |
| 74  | H | 4.0985  | -0.3731 | 0.0722  |
| 75  | H | 5.6237  | 0.3200  | -0.5162 |
| 76  | C | 1.0082  | -0.7841 | -4.0922 |
| 77  | H | 0.3501  | 0.0072  | -3.7098 |
| 78  | H | 0.8689  | -0.8534 | -5.1753 |
| 79  | H | 0.6737  | -1.7204 | -3.6412 |
| 80  | C | 5.7791  | 0.0423  | -5.5346 |
| 81  | H | 6.6727  | 0.5818  | -5.2027 |
| 82  | H | 6.1000  | -0.9577 | -5.8585 |
| 83  | H | 5.3789  | 0.5526  | -6.4185 |
| 84  | C | -2.4484 | -0.1683 | -0.9132 |
| 85  | H | -1.7466 | -0.3887 | -1.7220 |
| 86  | H | -3.4632 | -0.3428 | -1.2854 |
| 87  | H | -2.3621 | 0.9019  | -0.6856 |
| 88  | C | 0.7589  | -2.4597 | 2.2688  |
| 89  | H | 1.3688  | -1.5619 | 2.4296  |
| 90  | H | 0.7747  | -3.0543 | 3.1858  |
| 91  | H | 1.2457  | -3.0303 | 1.4754  |
| 92  | C | -4.2223 | -2.7243 | 3.0640  |
| 93  | H | -5.1217 | -2.1229 | 2.8925  |
| 94  | H | -4.4666 | -3.7622 | 2.7994  |
| 95  | H | -4.0008 | -2.7099 | 4.1377  |
| 96  | C | -0.5192 | -3.9730 | -1.6886 |
| 97  | C | -1.6368 | -3.1955 | -2.1468 |
| 98  | C | 0.2797  | -4.7057 | -2.6449 |
| 99  | C | -1.8115 | -2.9620 | -3.4885 |
| 100 | H | -2.3261 | -2.7926 | -1.4168 |
| 101 | C | 0.0376  | -4.4365 | -4.0353 |
| 102 | H | 0.6879  | -5.6738 | -2.3860 |
| 103 | C | -0.9503 | -3.5733 | -4.4481 |
| 104 | H | -2.6247 | -2.3199 | -3.8205 |
| 105 | H | 0.6158  | -4.9822 | -4.7727 |
| 106 | H | -1.1125 | -3.3938 | -5.5084 |

107

Br

-0.9393

-5.0312

0.0199

large\_basis\_TS-A-5-6-Br\_NiITMe2\_ossts\_PhBr\_t\_oss\_bb  
Energy (POTENTIAL) = -1181.44251873 Eh

|    | Atom | X       | Y       | Z       |
|----|------|---------|---------|---------|
| 1  | C    | -3.5750 | 3.3510  | 0.1943  |
| 2  | C    | -2.5766 | 4.1406  | -0.3004 |
| 3  | C    | -1.8704 | 1.9633  | -0.4591 |
| 4  | N    | -3.1232 | 2.0360  | 0.0827  |
| 5  | N    | -1.5552 | 3.2739  | -0.6923 |
| 6  | Ni   | -0.8002 | 0.4165  | -0.7521 |
| 7  | C    | 0.2379  | -1.0973 | -1.2652 |
| 8  | N    | 1.5510  | -1.3663 | -0.9956 |
| 9  | N    | -0.1711 | -2.2056 | -1.9560 |
| 10 | C    | 1.9486  | -2.6076 | -1.4921 |
| 11 | C    | 0.8519  | -3.1428 | -2.1048 |
| 12 | Br   | -0.5658 | -0.0572 | 1.8745  |
| 13 | C    | -0.3397 | -0.4640 | 3.9994  |
| 14 | C    | -0.3508 | -1.7816 | 4.4532  |
| 15 | C    | -0.1724 | 0.5945  | 4.8906  |
| 16 | C    | -0.1930 | -2.0441 | 5.8203  |
| 17 | H    | -0.4805 | -2.6030 | 3.7509  |
| 18 | C    | -0.0146 | 0.3297  | 6.2573  |
| 19 | H    | -0.1633 | 1.6209  | 4.5284  |
| 20 | C    | -0.0248 | -0.9891 | 6.7231  |
| 21 | H    | -0.2011 | -3.0716 | 6.1790  |
| 22 | H    | 0.1164  | 1.1530  | 6.9571  |
| 23 | H    | 0.0982  | -1.1937 | 7.7837  |
| 24 | C    | -3.8879 | 0.8778  | 0.5172  |
| 25 | H    | -4.8529 | 0.8419  | 0.0008  |
| 26 | H    | -3.3085 | -0.0144 | 0.2782  |
| 27 | H    | -4.0590 | 0.9117  | 1.5978  |
| 28 | C    | -0.2908 | 3.7149  | -1.2593 |
| 29 | H    | 0.3072  | 2.8259  | -1.4709 |
| 30 | H    | -0.4566 | 4.2719  | -2.1874 |
| 31 | H    | 0.2477  | 4.3536  | -0.5511 |
| 32 | C    | -2.4755 | 5.6208  | -0.4537 |
| 33 | H    | -3.3836 | 6.1060  | -0.0851 |
| 34 | H    | -1.6253 | 6.0299  | 0.1073  |
| 35 | H    | -2.3425 | 5.9118  | -1.5040 |
| 36 | C    | -4.9136 | 3.6934  | 0.7557  |
| 37 | H    | -5.7267 | 3.2478  | 0.1678  |
| 38 | H    | -5.0242 | 3.3340  | 1.7869  |
| 39 | H    | -5.0601 | 4.7771  | 0.7610  |
| 40 | C    | -1.5232 | -2.4001 | -2.4550 |
| 41 | H    | -1.9890 | -3.2689 | -1.9776 |
| 42 | H    | -2.1004 | -1.5045 | -2.2157 |
| 43 | H    | -1.5162 | -2.5506 | -3.5397 |
| 44 | C    | 2.4273  | -0.4758 | -0.2513 |
| 45 | H    | 3.3033  | -0.2109 | -0.8528 |
| 46 | H    | 1.8620  | 0.4238  | -0.0067 |
| 47 | H    | 2.7591  | -0.9506 | 0.6774  |
| 48 | C    | 3.3327  | -3.1352 | -1.3199 |
| 49 | H    | 3.5981  | -3.2355 | -0.2595 |
| 50 | H    | 3.4255  | -4.1216 | -1.7830 |
| 51 | H    | 4.0795  | -2.4762 | -1.7813 |

|    |   |         |         |         |
|----|---|---------|---------|---------|
| 52 | C | 0.6607  | -4.4353 | -2.8239 |
| 53 | H | -0.1326 | -5.0410 | -2.3673 |
| 54 | H | 0.3869  | -4.2790 | -3.8756 |
| 55 | H | 1.5836  | -5.0220 | -2.8032 |



large\_basis\_TS-B-2-3-Br\_NiMes2\_oa\_PhBr\_bb  
Energy (POTENTIAL) = -2263.26590917 Eh

|    | Atom | X       | Y       | Z       |
|----|------|---------|---------|---------|
| 1  | C    | 1.2021  | 1.3375  | 0.0487  |
| 2  | C    | 2.1927  | 1.6026  | -0.8234 |
| 3  | C    | 1.9020  | -0.6923 | -0.8066 |
| 4  | N    | 1.0179  | -0.0455 | 0.0433  |
| 5  | N    | 2.6118  | 0.3738  | -1.3327 |
| 6  | Ni   | 2.1367  | -2.5786 | -1.3680 |
| 7  | C    | 3.8322  | -3.7567 | -1.2445 |
| 8  | N    | 4.5567  | -4.0717 | -0.1133 |
| 9  | N    | 4.2741  | -4.7205 | -2.1355 |
| 10 | C    | 5.3849  | -5.1778 | -0.2950 |
| 11 | C    | 5.2094  | -5.5830 | -1.5705 |
| 12 | H    | 6.0207  | -5.5480 | 0.4941  |
| 13 | H    | 5.6543  | -6.3877 | -2.1350 |
| 14 | H    | 0.6023  | 1.9851  | 0.6683  |
| 15 | H    | 2.6405  | 2.5316  | -1.1386 |
| 16 | C    | 3.9874  | -4.8048 | -3.5407 |
| 17 | C    | 3.3062  | -5.9226 | -4.0451 |
| 18 | C    | 4.5176  | -3.8162 | -4.3884 |
| 19 | C    | 3.0963  | -5.9928 | -5.4295 |
| 20 | C    | 4.2658  | -3.9194 | -5.7582 |
| 21 | C    | 3.5471  | -4.9950 | -6.2976 |
| 22 | H    | 2.5542  | -6.8459 | -5.8318 |
| 23 | H    | 4.6598  | -3.1537 | -6.4232 |
| 24 | C    | 4.7222  | -3.2699 | 1.0698  |
| 25 | C    | 5.6390  | -2.2062 | 1.0127  |
| 26 | C    | 4.1246  | -3.6705 | 2.2720  |
| 27 | C    | 5.8720  | -1.4757 | 2.1817  |
| 28 | C    | 4.4059  | -2.9236 | 3.4223  |
| 29 | C    | 5.2552  | -1.8128 | 3.3935  |
| 30 | H    | 6.5704  | -0.6423 | 2.1511  |
| 31 | H    | 3.9410  | -3.2149 | 4.3614  |
| 32 | C    | -0.0818 | -0.5819 | 0.8022  |
| 33 | C    | -1.3892 | -0.2118 | 0.4382  |
| 34 | C    | 0.1713  | -1.3344 | 1.9570  |
| 35 | C    | -2.4470 | -0.6564 | 1.2419  |
| 36 | C    | -0.9136 | -1.7449 | 2.7335  |
| 37 | C    | -2.2312 | -1.4245 | 2.3896  |
| 38 | H    | -3.4636 | -0.3880 | 0.9620  |
| 39 | H    | -0.7234 | -2.3345 | 3.6280  |
| 40 | C    | 3.6130  | 0.3614  | -2.3642 |
| 41 | C    | 4.9192  | 0.7606  | -2.0363 |
| 42 | C    | 3.2205  | 0.1434  | -3.6984 |
| 43 | C    | 5.8548  | 0.8721  | -3.0737 |
| 44 | C    | 4.1847  | 0.2859  | -4.6987 |
| 45 | C    | 5.5077  | 0.6413  | -4.4073 |
| 46 | H    | 6.8740  | 1.1636  | -2.8293 |
| 47 | H    | 3.8943  | 0.1144  | -5.7331 |
| 48 | C    | 5.3882  | -2.7181 | -3.8368 |
| 49 | H    | 4.8161  | -2.0297 | -3.2120 |
| 50 | H    | 6.1876  | -3.1338 | -3.2114 |
| 51 | H    | 5.8486  | -2.1459 | -4.6448 |

|     |   |         |         |         |
|-----|---|---------|---------|---------|
| 52  | C | 2.8167  | -7.0406 | -3.1543 |
| 53  | H | 3.5674  | -7.8382 | -3.0761 |
| 54  | H | 2.6024  | -6.7015 | -2.1368 |
| 55  | H | 1.9057  | -7.4892 | -3.5636 |
| 56  | C | 3.2560  | -5.0588 | -7.7776 |
| 57  | H | 4.1195  | -4.7365 | -8.3713 |
| 58  | H | 2.9834  | -6.0719 | -8.0921 |
| 59  | H | 2.4197  | -4.3962 | -8.0391 |
| 60  | C | 3.2117  | -4.8681 | 2.3224  |
| 61  | H | 3.7488  | -5.7908 | 2.0684  |
| 62  | H | 2.7843  | -4.9922 | 3.3224  |
| 63  | H | 2.3892  | -4.7687 | 1.6061  |
| 64  | C | 6.4000  | -1.9199 | -0.2568 |
| 65  | H | 6.9470  | -2.8108 | -0.5896 |
| 66  | H | 5.7303  | -1.6341 | -1.0716 |
| 67  | H | 7.1248  | -1.1161 | -0.1068 |
| 68  | C | 5.4936  | -0.9884 | 4.6356  |
| 69  | H | 4.7685  | -0.1658 | 4.7035  |
| 70  | H | 5.3874  | -1.5898 | 5.5453  |
| 71  | H | 6.4935  | -0.5402 | 4.6356  |
| 72  | C | 5.3029  | 1.1270  | -0.6225 |
| 73  | H | 4.9629  | 2.1405  | -0.3743 |
| 74  | H | 4.8591  | 0.4505  | 0.1131  |
| 75  | H | 6.3893  | 1.1101  | -0.4995 |
| 76  | C | 1.7994  | -0.2132 | -4.0394 |
| 77  | H | 1.0915  | 0.5079  | -3.6124 |
| 78  | H | 1.6518  | -0.2422 | -5.1232 |
| 79  | H | 1.5393  | -1.1920 | -3.6306 |
| 80  | C | 6.5340  | 0.7365  | -5.5096 |
| 81  | H | 7.4242  | 1.2874  | -5.1877 |
| 82  | H | 6.8618  | -0.2636 | -5.8257 |
| 83  | H | 6.1248  | 1.2345  | -6.3964 |
| 84  | C | -1.6811 | 0.6570  | -0.7653 |
| 85  | H | -0.9715 | 0.4843  | -1.5791 |
| 86  | H | -2.6890 | 0.4578  | -1.1442 |
| 87  | H | -1.6329 | 1.7233  | -0.5096 |
| 88  | C | 1.5776  | -1.6919 | 2.3335  |
| 89  | H | 2.2074  | -0.8017 | 2.4547  |
| 90  | H | 1.6048  | -2.2627 | 3.2650  |
| 91  | H | 2.0320  | -2.2945 | 1.5445  |
| 92  | C | -3.3870 | -1.9204 | 3.2255  |
| 93  | H | -4.2905 | -1.3232 | 3.0612  |
| 94  | H | -3.6319 | -2.9620 | 2.9768  |
| 95  | H | -3.1490 | -1.8932 | 4.2954  |
| 96  | C | 0.3551  | -3.1183 | -1.7432 |
| 97  | C | -0.7827 | -2.3451 | -2.1248 |
| 98  | C | 1.0004  | -3.9295 | -2.7286 |
| 99  | C | -1.1052 | -2.2090 | -3.4585 |
| 100 | H | -1.3683 | -1.8615 | -1.3562 |
| 101 | C | 0.6395  | -3.7626 | -4.0923 |
| 102 | H | 1.5381  | -4.8180 | -2.4376 |
| 103 | C | -0.3765 | -2.9004 | -4.4620 |
| 104 | H | -1.9361 | -1.5652 | -3.7413 |
| 105 | H | 1.1372  | -4.3733 | -4.8394 |
| 106 | H | -0.6552 | -2.7920 | -5.5072 |

107

Br

0.0002

-4.2659

0.0970

large\_basis\_B-3-Cl\_tetNiClPhIMes2\_bb  
 Energy (POTENTIAL) = -2710.38226377 Eh

|    | Atom | X       | Y       | Z       |
|----|------|---------|---------|---------|
| 1  | C    | 0.4543  | 0.4003  | -0.1511 |
| 2  | C    | 0.6598  | 1.4451  | -0.9796 |
| 3  | C    | 2.2144  | -0.1611 | -1.5121 |
| 4  | N    | 1.3939  | -0.5738 | -0.4964 |
| 5  | N    | 1.7234  | 1.0938  | -1.8017 |
| 6  | Ni   | 3.9775  | -0.6974 | -2.4381 |
| 7  | C    | 3.9604  | -2.5217 | -3.0185 |
| 8  | N    | 4.7960  | -3.4550 | -2.4367 |
| 9  | N    | 3.6006  | -3.1054 | -4.2077 |
| 10 | C    | 4.9764  | -4.5553 | -3.2776 |
| 11 | C    | 4.2270  | -4.3396 | -4.3804 |
| 12 | H    | 5.6015  | -5.3860 | -2.9895 |
| 13 | H    | 4.0592  | -4.9381 | -5.2622 |
| 14 | H    | -0.2602 | 0.2410  | 0.6407  |
| 15 | H    | 0.1622  | 2.3978  | -1.0709 |
| 16 | C    | 2.4972  | -2.7270 | -5.0618 |
| 17 | C    | 1.2152  | -3.1569 | -4.6616 |
| 18 | C    | 2.7033  | -2.0881 | -6.2935 |
| 19 | C    | 0.1265  | -2.8625 | -5.4841 |
| 20 | C    | 1.5784  | -1.8275 | -7.0896 |
| 21 | C    | 0.2873  | -2.1894 | -6.7015 |
| 22 | H    | -0.8667 | -3.1807 | -5.1748 |
| 23 | H    | 1.7254  | -1.3256 | -8.0433 |
| 24 | C    | 5.2180  | -3.5480 | -1.0485 |
| 25 | C    | 6.3958  | -2.9376 | -0.5800 |
| 26 | C    | 4.4676  | -4.4089 | -0.2219 |
| 27 | C    | 6.7622  | -3.1540 | 0.7546  |
| 28 | C    | 4.9004  | -4.6195 | 1.0906  |
| 29 | C    | 6.0325  | -3.9855 | 1.6069  |
| 30 | H    | 7.6620  | -2.6695 | 1.1267  |
| 31 | H    | 4.3257  | -5.2876 | 1.7267  |
| 32 | C    | 1.3298  | -1.8499 | 0.1674  |
| 33 | C    | 0.2112  | -2.6653 | -0.0900 |
| 34 | C    | 2.2607  | -2.1594 | 1.1702  |
| 35 | C    | 0.0571  | -3.8278 | 0.6728  |
| 36 | C    | 2.0430  | -3.3163 | 1.9252  |
| 37 | C    | 0.9560  | -4.1635 | 1.6908  |
| 38 | H    | -0.7951 | -4.4750 | 0.4767  |
| 39 | H    | 2.7481  | -3.5622 | 2.7143  |
| 40 | C    | 2.1574  | 1.9687  | -2.8596 |
| 41 | C    | 2.8242  | 3.1635  | -2.5494 |
| 42 | C    | 1.8054  | 1.6369  | -4.1794 |
| 43 | C    | 3.2346  | 3.9741  | -3.6173 |
| 44 | C    | 2.2347  | 2.4765  | -5.2085 |
| 45 | C    | 2.9708  | 3.6394  | -4.9485 |
| 46 | H    | 3.7787  | 4.8895  | -3.3959 |
| 47 | H    | 1.9873  | 2.2177  | -6.2358 |
| 48 | C    | 4.0647  | -1.6732 | -6.7831 |
| 49 | H    | 4.3449  | -0.6967 | -6.3754 |
| 50 | H    | 4.8415  | -2.3769 | -6.4786 |
| 51 | H    | 4.0707  | -1.5988 | -7.8757 |

|     |   |         |         |         |
|-----|---|---------|---------|---------|
| 52  | C | 1.0255  | -3.9390 | -3.3889 |
| 53  | H | -0.0252 | -4.2030 | -3.2457 |
| 54  | H | 1.6109  | -4.8659 | -3.4022 |
| 55  | H | 1.3560  | -3.3674 | -2.5188 |
| 56  | C | -0.9096 | -1.8460 | -7.5541 |
| 57  | H | -0.6247 | -1.6616 | -8.5954 |
| 58  | H | -1.6574 | -2.6472 | -7.5386 |
| 59  | H | -1.4025 | -0.9373 | -7.1823 |
| 60  | C | 3.2121  | -5.0882 | -0.7063 |
| 61  | H | 3.3808  | -5.6769 | -1.6138 |
| 62  | H | 2.8173  | -5.7572 | 0.0621  |
| 63  | H | 2.4391  | -4.3504 | -0.9346 |
| 64  | C | 7.2876  | -2.0990 | -1.4524 |
| 65  | H | 8.1672  | -1.7686 | -0.8912 |
| 66  | H | 7.6368  | -2.6639 | -2.3232 |
| 67  | H | 6.7617  | -1.2152 | -1.8169 |
| 68  | C | 6.4353  | -4.1722 | 3.0491  |
| 69  | H | 7.5190  | -4.0808 | 3.1812  |
| 70  | H | 5.9653  | -3.4095 | 3.6852  |
| 71  | H | 6.1232  | -5.1510 | 3.4303  |
| 72  | C | 3.0574  | 3.6084  | -1.1278 |
| 73  | H | 3.2784  | 2.7633  | -0.4743 |
| 74  | H | 3.8986  | 4.3068  | -1.0762 |
| 75  | H | 2.1728  | 4.1278  | -0.7342 |
| 76  | C | 0.9680  | 0.4211  | -4.4673 |
| 77  | H | 0.0514  | 0.4185  | -3.8641 |
| 78  | H | 0.6852  | 0.3828  | -5.5210 |
| 79  | H | 1.5125  | -0.4946 | -4.2298 |
| 80  | C | 3.4691  | 4.4971  | -6.0863 |
| 81  | H | 2.6643  | 4.7326  | -6.7936 |
| 82  | H | 3.8926  | 5.4403  | -5.7258 |
| 83  | H | 4.2512  | 3.9749  | -6.6531 |
| 84  | C | -0.8353 | -2.2870 | -1.1123 |
| 85  | H | -0.3991 | -1.8217 | -2.0003 |
| 86  | H | -1.3993 | -3.1693 | -1.4294 |
| 87  | H | -1.5546 | -1.5713 | -0.6942 |
| 88  | C | 3.4449  | -1.2689 | 1.4345  |
| 89  | H | 3.1281  | -0.2529 | 1.7013  |
| 90  | H | 4.0541  | -1.6650 | 2.2516  |
| 91  | H | 4.0758  | -1.1707 | 0.5463  |
| 92  | C | 0.7875  | -5.4368 | 2.4830  |
| 93  | H | 1.2272  | -5.3495 | 3.4827  |
| 94  | H | -0.2684 | -5.7075 | 2.5943  |
| 95  | H | 1.2862  | -6.2771 | 1.9797  |
| 96  | C | 5.3420  | -0.4378 | -3.8020 |
| 97  | C | 5.2929  | 0.8784  | -4.3070 |
| 98  | C | 6.2785  | -1.2942 | -4.4049 |
| 99  | C | 6.1135  | 1.3074  | -5.3562 |
| 100 | H | 4.6150  | 1.5959  | -3.8628 |
| 101 | C | 7.1283  | -0.8700 | -5.4330 |
| 102 | H | 6.3575  | -2.3266 | -4.0848 |
| 103 | C | 7.0464  | 0.4343  | -5.9240 |
| 104 | H | 6.0334  | 2.3332  | -5.7128 |
| 105 | H | 7.8441  | -1.5699 | -5.8616 |
| 106 | H | 7.6976  | 0.7658  | -6.7298 |

107

C1

5.0757

0.8497

-1.0615

large\_basis\_A-5-I\_NiITMe2\_IPh\_bb  
 Energy (POTENTIAL) = -1179.66794041 Eh

|    | Atom | X       | Y       | Z       |
|----|------|---------|---------|---------|
| 1  | C    | -0.3870 | 0.3171  | -0.0350 |
| 2  | C    | 0.2182  | 0.2312  | -1.2565 |
| 3  | C    | -0.0962 | 2.4590  | -0.8045 |
| 4  | N    | -0.5714 | 1.6765  | 0.2138  |
| 5  | N    | 0.3821  | 1.5428  | -1.7026 |
| 6  | C    | -1.1732 | 2.2014  | 1.4293  |
| 7  | H    | -1.2354 | 3.2862  | 1.3305  |
| 8  | H    | -2.1773 | 1.7871  | 1.5676  |
| 9  | H    | -0.5595 | 1.9558  | 2.3019  |
| 10 | C    | 1.0084  | 1.8969  | -2.9667 |
| 11 | H    | 0.4668  | 1.4467  | -3.8051 |
| 12 | H    | 0.9806  | 2.9847  | -3.0585 |
| 13 | H    | 2.0494  | 1.5578  | -2.9897 |
| 14 | C    | 0.6505  | -0.9506 | -2.0574 |
| 15 | H    | 0.1202  | -1.0070 | -3.0171 |
| 16 | H    | 1.7249  | -0.9202 | -2.2795 |
| 17 | H    | 0.4488  | -1.8756 | -1.5096 |
| 18 | C    | -0.8106 | -0.7391 | 0.9288  |
| 19 | H    | -0.5512 | -1.7302 | 0.5464  |
| 20 | H    | -0.3201 | -0.6156 | 1.9030  |
| 21 | H    | -1.8940 | -0.7199 | 1.1051  |
| 22 | C    | -0.0926 | 6.2295  | -1.0860 |
| 23 | N    | 0.8823  | 7.0814  | -1.5316 |
| 24 | N    | -1.1125 | 7.0778  | -0.7451 |
| 25 | C    | 0.4889  | 8.4174  | -1.4614 |
| 26 | C    | 2.1892  | 6.6479  | -2.0000 |
| 27 | C    | -0.7824 | 8.4154  | -0.9625 |
| 28 | C    | -2.3871 | 6.6373  | -0.2003 |
| 29 | C    | 1.3756  | 9.5389  | -1.8856 |
| 30 | H    | 2.1936  | 5.5571  | -2.0157 |
| 31 | H    | 2.3786  | 7.0309  | -3.0081 |
| 32 | H    | 2.9780  | 7.0010  | -1.3278 |
| 33 | C    | -1.7250 | 9.5323  | -0.6662 |
| 34 | H    | -3.2138 | 6.9662  | -0.8386 |
| 35 | H    | -2.3723 | 5.5461  | -0.1594 |
| 36 | H    | -2.5339 | 7.0367  | 0.8088  |
| 37 | H    | 0.8735  | 10.4990 | -1.7376 |
| 38 | H    | 2.3102  | 9.5567  | -1.3104 |
| 39 | H    | 1.6478  | 9.4625  | -2.9464 |
| 40 | H    | -2.6566 | 9.4399  | -1.2395 |
| 41 | H    | -1.9986 | 9.5601  | 0.3965  |
| 42 | H    | -1.2698 | 10.4937 | -0.9201 |
| 43 | Ni   | -0.0352 | 4.3474  | -0.9000 |
| 44 | I    | 1.9460  | 4.4637  | 1.1570  |
| 45 | C    | 3.5027  | 4.5496  | 2.7903  |
| 46 | C    | 3.1530  | 5.0057  | 4.0646  |
| 47 | C    | 4.8144  | 4.1441  | 2.5278  |
| 48 | C    | 4.1185  | 5.0561  | 5.0770  |
| 49 | H    | 2.1332  | 5.3222  | 4.2733  |
| 50 | C    | 5.7775  | 4.1969  | 3.5424  |
| 51 | H    | 5.0910  | 3.7875  | 1.5379  |

|    |   |        |        |        |
|----|---|--------|--------|--------|
| 52 | C | 5.4315 | 4.6523 | 4.8180 |
| 53 | H | 3.8424 | 5.4109 | 6.0678 |
| 54 | H | 6.7976 | 3.8812 | 3.3341 |
| 55 | H | 6.1804 | 4.6918 | 5.6049 |



large\_basis\_C-5-Cl\_NiIXy2\_ClPh\_bb  
 Energy (POTENTIAL) = -2553.01330102 Eh

|    | Atom | X       | Y       | Z       |
|----|------|---------|---------|---------|
| 1  | C    | -0.4457 | 1.0354  | 0.1001  |
| 2  | C    | 0.5806  | 1.8259  | -0.2950 |
| 3  | C    | 1.2891  | -0.3558 | -0.5002 |
| 4  | N    | -0.0066 | -0.2817 | -0.0271 |
| 5  | N    | 1.6234  | 0.9724  | -0.6533 |
| 6  | Ni   | 2.3447  | -1.8440 | -0.8504 |
| 7  | C    | 3.4060  | -3.3084 | -1.2827 |
| 8  | N    | 4.6912  | -3.6216 | -0.8801 |
| 9  | N    | 3.0893  | -4.3661 | -2.1064 |
| 10 | C    | 5.1387  | -4.8183 | -1.4384 |
| 11 | C    | 4.1307  | -5.2874 | -2.2114 |
| 12 | H    | 6.1220  | -5.2123 | -1.2330 |
| 13 | H    | 4.0509  | -6.1745 | -2.8208 |
| 14 | H    | -1.4371 | 1.2768  | 0.4512  |
| 15 | H    | 0.6721  | 2.8994  | -0.3593 |
| 16 | C    | 1.8251  | -4.5349 | -2.7648 |
| 17 | C    | 0.7677  | -5.1278 | -2.0547 |
| 18 | C    | 1.7076  | -4.1461 | -4.1098 |
| 19 | C    | -0.4249 | -5.3738 | -2.7455 |
| 20 | C    | 0.4935  | -4.3976 | -4.7604 |
| 21 | C    | -0.5598 | -5.0199 | -4.0886 |
| 22 | H    | -1.2527 | -5.8416 | -2.2199 |
| 23 | H    | 0.3783  | -4.1045 | -5.8010 |
| 24 | C    | 5.4705  | -2.8325 | 0.0307  |
| 25 | C    | 6.0008  | -1.6075 | -0.4121 |
| 26 | C    | 5.7019  | -3.3268 | 1.3271  |
| 27 | C    | 6.7597  | -0.8570 | 0.4943  |
| 28 | C    | 6.4667  | -2.5430 | 2.2009  |
| 29 | C    | 6.9882  | -1.3156 | 1.7917  |
| 30 | H    | 7.1731  | 0.0943  | 0.1721  |
| 31 | H    | 6.6515  | -2.9042 | 3.2097  |
| 32 | C    | -0.8030 | -1.4225 | 0.3215  |
| 33 | C    | -1.3233 | -2.2256 | -0.7091 |
| 34 | C    | -1.0623 | -1.6791 | 1.6795  |
| 35 | C    | -2.1029 | -3.3307 | -0.3469 |
| 36 | C    | -1.8485 | -2.7944 | 1.9967  |
| 37 | C    | -2.3610 | -3.6177 | 0.9940  |
| 38 | H    | -2.5093 | -3.9664 | -1.1283 |
| 39 | H    | -2.0555 | -3.0139 | 3.0413  |
| 40 | C    | 2.9080  | 1.4448  | -1.0857 |
| 41 | C    | 3.9280  | 1.5884  | -0.1303 |
| 42 | C    | 3.0811  | 1.7994  | -2.4339 |
| 43 | C    | 5.1427  | 2.1430  | -0.5501 |
| 44 | C    | 4.3161  | 2.3375  | -2.8161 |
| 45 | C    | 5.3345  | 2.5216  | -1.8796 |
| 46 | H    | 5.9430  | 2.2713  | 0.1737  |
| 47 | H    | 4.4742  | 2.6166  | -3.8548 |
| 48 | C    | 2.8474  | -3.4474 | -4.8071 |
| 49 | H    | 3.0920  | -2.5104 | -4.2907 |
| 50 | H    | 3.7600  | -4.0555 | -4.8099 |
| 51 | H    | 2.5897  | -3.2131 | -5.8446 |

|    |    |         |         |         |
|----|----|---------|---------|---------|
| 52 | C  | 0.9084  | -5.4328 | -0.5868 |
| 53 | H  | 1.7829  | -6.0628 | -0.3828 |
| 54 | H  | 1.0490  | -4.4993 | -0.0279 |
| 55 | H  | 0.0189  | -5.9392 | -0.2006 |
| 56 | C  | 5.1561  | -4.6614 | 1.7728  |
| 57 | H  | 5.7737  | -5.4901 | 1.4025  |
| 58 | H  | 5.1346  | -4.7255 | 2.8650  |
| 59 | H  | 4.1405  | -4.8217 | 1.4020  |
| 60 | C  | 5.7448  | -1.1089 | -1.8095 |
| 61 | H  | 5.9316  | -1.8908 | -2.5551 |
| 62 | H  | 4.6928  | -0.8130 | -1.9150 |
| 63 | H  | 6.3750  | -0.2466 | -2.0407 |
| 64 | C  | 3.7193  | 1.1152  | 1.2841  |
| 65 | H  | 2.8520  | 1.5993  | 1.7504  |
| 66 | H  | 3.5243  | 0.0357  | 1.2875  |
| 67 | H  | 4.6002  | 1.3126  | 1.9018  |
| 68 | C  | 1.9752  | 1.5725  | -3.4332 |
| 69 | H  | 1.0671  | 2.1284  | -3.1698 |
| 70 | H  | 2.2838  | 1.8794  | -4.4375 |
| 71 | H  | 1.7007  | 0.5104  | -3.4637 |
| 72 | C  | -1.0346 | -1.9160 | -2.1544 |
| 73 | H  | -1.2091 | -0.8571 | -2.3797 |
| 74 | H  | 0.0208  | -2.1194 | -2.3795 |
| 75 | H  | -1.6566 | -2.5223 | -2.8179 |
| 76 | C  | -0.5204 | -0.7853 | 2.7678  |
| 77 | H  | -1.1363 | 0.1155  | 2.8890  |
| 78 | H  | -0.5064 | -1.3102 | 3.7279  |
| 79 | H  | 0.4979  | -0.4564 | 2.5441  |
| 80 | C  | 2.2534  | -3.1996 | 3.8441  |
| 81 | C  | 1.1159  | -3.8009 | 4.3859  |
| 82 | C  | 3.3835  | -2.9473 | 4.6242  |
| 83 | C  | 1.1161  | -4.1554 | 5.7377  |
| 84 | H  | 0.2489  | -3.9851 | 3.7589  |
| 85 | C  | 3.3697  | -3.3092 | 5.9738  |
| 86 | H  | 4.2548  | -2.4766 | 4.1793  |
| 87 | C  | 2.2395  | -3.9120 | 6.5332  |
| 88 | H  | 0.2342  | -4.6237 | 6.1668  |
| 89 | H  | 4.2464  | -3.1162 | 6.5866  |
| 90 | H  | 2.2340  | -4.1906 | 7.5833  |
| 91 | Cl | 2.2643  | -2.7442 | 2.1353  |
| 92 | H  | 6.2841  | 2.9506  | -2.1892 |
| 93 | H  | -1.4923 | -5.2194 | -4.6106 |
| 94 | H  | 7.5786  | -0.7190 | 2.4825  |
| 95 | H  | -2.9674 | -4.4808 | 1.2573  |

large\_basis\_PhH\_benzene\_bb

Energy (POTENTIAL) = -232.324133299 Eh

|    | Atom | X       | Y       | Z       |
|----|------|---------|---------|---------|
| 1  | C    | -2.2263 | 0.0406  | 0.0001  |
| 2  | C    | -0.8279 | 0.0406  | 0.0006  |
| 3  | C    | -0.1287 | 1.2514  | -0.0001 |
| 4  | C    | -0.8279 | 2.4624  | -0.0010 |
| 5  | C    | -2.2260 | 2.4625  | -0.0014 |
| 6  | C    | -2.9253 | 1.2515  | -0.0010 |
| 7  | H    | -2.7696 | -0.9006 | 0.0004  |
| 8  | H    | -0.2847 | -0.9008 | 0.0014  |
| 9  | H    | 0.9582  | 1.2515  | 0.0001  |
| 10 | H    | -0.2843 | 3.4036  | -0.0014 |
| 11 | H    | -2.7695 | 3.4037  | -0.0022 |
| 12 | H    | -4.0122 | 1.2517  | -0.0013 |

large\_basis\_NiIMes2\_distort\_NiIMes2\_eta2\_PhI\_fixCI\_bb\_NiL2frag  
Energy (POTENTIAL) = -2018.31627941 Eh

|    | Atom | X       | Y       | Z       |
|----|------|---------|---------|---------|
| 1  | C    | 0.4072  | 0.5732  | 0.0255  |
| 2  | C    | 1.4047  | 0.8576  | -0.8331 |
| 3  | C    | 1.1193  | -1.4392 | -0.8658 |
| 4  | N    | 0.2285  | -0.8096 | -0.0095 |
| 5  | N    | 1.8313  | -0.3596 | -1.3623 |
| 6  | Ni   | 1.3047  | -3.3336 | -1.4913 |
| 7  | C    | 3.0162  | -4.4950 | -1.3574 |
| 8  | N    | 3.7466  | -4.8011 | -0.2247 |
| 9  | N    | 3.4478  | -5.4771 | -2.2358 |
| 10 | C    | 4.5644  | -5.9173 | -0.3949 |
| 11 | C    | 4.3802  | -6.3382 | -1.6629 |
| 12 | H    | 5.2009  | -6.2814 | 0.3966  |
| 13 | H    | 4.8168  | -7.1537 | -2.2182 |
| 14 | H    | -0.2003 | 1.2065  | 0.6526  |
| 15 | H    | 1.8540  | 1.7937  | -1.1252 |
| 16 | C    | 3.1489  | -5.6003 | -3.6353 |
| 17 | C    | 2.4859  | -6.7464 | -4.1007 |
| 18 | C    | 3.6489  | -4.6258 | -4.5169 |
| 19 | C    | 2.2782  | -6.8698 | -5.4817 |
| 20 | C    | 3.4030  | -4.7846 | -5.8826 |
| 21 | C    | 2.7137  | -5.8967 | -6.3852 |
| 22 | H    | 1.7510  | -7.7459 | -5.8532 |
| 23 | H    | 3.7763  | -4.0319 | -6.5739 |
| 24 | C    | 3.9411  | -3.9883 | 0.9464  |
| 25 | C    | 4.8852  | -2.9501 | 0.8673  |
| 26 | C    | 3.3557  | -4.3662 | 2.1618  |
| 27 | C    | 5.1552  | -2.2174 | 2.0268  |
| 28 | C    | 3.6699  | -3.6155 | 3.3013  |
| 29 | C    | 4.5468  | -2.5273 | 3.2502  |
| 30 | H    | 5.8754  | -1.4036 | 1.9798  |
| 31 | H    | 3.2130  | -3.8885 | 4.2499  |
| 32 | C    | -0.8753 | -1.3666 | 0.7274  |
| 33 | C    | -2.1830 | -1.0326 | 0.3316  |
| 34 | C    | -0.6285 | -2.1012 | 1.8954  |
| 35 | C    | -3.2467 | -1.5053 | 1.1105  |
| 36 | C    | -1.7200 | -2.5353 | 2.6511  |
| 37 | C    | -3.0373 | -2.2596 | 2.2691  |
| 38 | H    | -4.2637 | -1.2700 | 0.8037  |
| 39 | H    | -1.5352 | -3.1153 | 3.5528  |
| 40 | C    | 2.8366  | -0.3501 | -2.3897 |
| 41 | C    | 4.1500  | 0.0080  | -2.0470 |
| 42 | C    | 2.4393  | -0.5038 | -3.7305 |
| 43 | C    | 5.0921  | 0.1198  | -3.0784 |
| 44 | C    | 3.4089  | -0.3610 | -4.7253 |
| 45 | C    | 4.7431  | -0.0646 | -4.4191 |
| 46 | H    | 6.1183  | 0.3760  | -2.8238 |
| 47 | H    | 3.1148  | -0.4852 | -5.7653 |
| 48 | C    | 4.4775  | -3.4769 | -4.0053 |
| 49 | H    | 3.8835  | -2.8016 | -3.3860 |
| 50 | H    | 5.3050  | -3.8398 | -3.3836 |
| 51 | H    | 4.8978  | -2.9024 | -4.8337 |

|    |   |         |         |         |
|----|---|---------|---------|---------|
| 52 | C | 2.0060  | -7.8363 | -3.1704 |
| 53 | H | 2.7710  | -8.6135 | -3.0419 |
| 54 | H | 1.7635  | -7.4569 | -2.1735 |
| 55 | H | 1.1131  | -8.3219 | -3.5772 |
| 56 | C | 2.4326  | -6.0214 | -7.8634 |
| 57 | H | 3.2972  | -5.7140 | -8.4636 |
| 58 | H | 2.1731  | -7.0490 | -8.1392 |
| 59 | H | 1.5918  | -5.3785 | -8.1569 |
| 60 | C | 2.4330  | -5.5550 | 2.2397  |
| 61 | H | 2.9803  | -6.4929 | 2.0780  |
| 62 | H | 1.9496  | -5.6139 | 3.2197  |
| 63 | H | 1.6532  | -5.5042 | 1.4741  |
| 64 | C | 5.6356  | -2.6986 | -0.4159 |
| 65 | H | 6.1553  | -3.6076 | -0.7436 |
| 66 | H | 4.9617  | -2.4074 | -1.2254 |
| 67 | H | 6.3826  | -1.9114 | -0.2874 |
| 68 | C | 4.8286  | -1.7006 | 4.4817  |
| 69 | H | 4.1354  | -0.8511 | 4.5507  |
| 70 | H | 4.7117  | -2.2896 | 5.3981  |
| 71 | H | 5.8442  | -1.2894 | 4.4658  |
| 72 | C | 4.5304  | 0.3359  | -0.6239 |
| 73 | H | 4.1850  | 1.3410  | -0.3499 |
| 74 | H | 4.0865  | -0.3615 | 0.0911  |
| 75 | H | 5.6164  | 0.3201  | -0.4979 |
| 76 | C | 1.0011  | -0.7748 | -4.0767 |
| 77 | H | 0.3461  | 0.0195  | -3.6953 |
| 78 | H | 0.8628  | -0.8440 | -5.1597 |
| 79 | H | 0.6618  | -1.7090 | -3.6258 |
| 80 | C | 5.7780  | 0.0241  | -5.5140 |
| 81 | H | 6.6738  | 0.5598  | -5.1821 |
| 82 | H | 6.0938  | -0.9786 | -5.8342 |
| 83 | H | 5.3820  | 0.5338  | -6.4002 |
| 84 | C | -2.4625 | -0.1674 | -0.8760 |
| 85 | H | -1.7493 | -0.3495 | -1.6841 |
| 86 | H | -3.4699 | -0.3581 | -1.2600 |
| 87 | H | -2.4051 | 0.8989  | -0.6218 |
| 88 | C | 0.7791  | -2.4264 | 2.2976  |
| 89 | H | 1.3808  | -1.5205 | 2.4425  |
| 90 | H | 0.8031  | -3.0075 | 3.2229  |
| 91 | H | 1.2705  | -3.0046 | 1.5116  |
| 92 | C | -4.1991 | -2.7967 | 3.0694  |
| 93 | H | -5.1092 | -2.2093 | 2.9060  |
| 94 | H | -4.4215 | -3.8337 | 2.7828  |
| 95 | H | -3.9802 | -2.7985 | 4.1434  |

large\_basis\_PhBr\_PhBr\_bb

Energy (POTENTIAL) = -244.896837913 Eh

|    | Atom | X       | Y       | Z       |
|----|------|---------|---------|---------|
| 1  | C    | -2.2270 | 0.0426  | 0.0000  |
| 2  | C    | -0.8294 | 0.0322  | 0.0006  |
| 3  | C    | -0.1510 | 1.2514  | 0.0000  |
| 4  | C    | -0.8293 | 2.4707  | -0.0010 |
| 5  | C    | -2.2269 | 2.4604  | -0.0015 |
| 6  | C    | -2.9269 | 1.2516  | -0.0010 |
| 7  | H    | -2.7640 | -0.9018 | 0.0005  |
| 8  | H    | -0.2848 | -0.9060 | 0.0014  |
| 9  | H    | -0.2846 | 3.4088  | -0.0014 |
| 10 | H    | -2.7639 | 3.4050  | -0.0023 |
| 11 | H    | -4.0131 | 1.2516  | -0.0014 |
| 12 | Br   | 1.7869  | 1.2514  | 0.0007  |

large\_basis\_A-4-Br\_trans-NiBrPhITMe2\_bb  
Energy (POTENTIAL) = -1181.54575592 Eh

|    | Atom | X       | Y       | Z       |
|----|------|---------|---------|---------|
| 1  | C    | -0.6690 | 2.1767  | 1.0281  |
| 2  | C    | 0.2350  | 2.1176  | 0.0081  |
| 3  | C    | -0.1017 | 4.3201  | 0.4944  |
| 4  | N    | -0.8569 | 3.5353  | 1.3033  |
| 5  | N    | 0.5653  | 3.4424  | -0.2967 |
| 6  | C    | -1.7556 | 4.0455  | 2.3264  |
| 7  | H    | -1.6201 | 5.1257  | 2.3883  |
| 8  | H    | -2.7963 | 3.8198  | 2.0726  |
| 9  | H    | -1.5179 | 3.6014  | 3.2975  |
| 10 | C    | 1.5019  | 3.8335  | -1.3382 |
| 11 | H    | 1.1003  | 3.5963  | -2.3284 |
| 12 | H    | 1.6644  | 4.9089  | -1.2616 |
| 13 | H    | 2.4567  | 3.3172  | -1.2020 |
| 14 | C    | 0.8414  | 0.9594  | -0.7085 |
| 15 | H    | 0.6475  | 1.0041  | -1.7879 |
| 16 | H    | 1.9301  | 0.9243  | -0.5723 |
| 17 | H    | 0.4275  | 0.0200  | -0.3319 |
| 18 | C    | -1.3754 | 1.1052  | 1.7868  |
| 19 | H    | -1.1080 | 0.1208  | 1.3932  |
| 20 | H    | -1.1132 | 1.1233  | 2.8527  |
| 21 | H    | -2.4655 | 1.2113  | 1.7170  |
| 22 | C    | -0.1349 | 8.1718  | 0.2537  |
| 23 | N    | 0.6297  | 8.9585  | -0.5442 |
| 24 | N    | -1.0000 | 9.0341  | 0.8445  |
| 25 | C    | 0.2518  | 10.3026 | -0.4609 |
| 26 | C    | 1.7049  | 8.4613  | -1.3879 |
| 27 | C    | -0.7856 | 10.3508 | 0.4237  |
| 28 | C    | -2.0264 | 8.6366  | 1.7946  |
| 29 | C    | 0.9378  | 11.3740 | -1.2389 |
| 30 | H    | 1.8683  | 7.4107  | -1.1452 |
| 31 | H    | 1.4417  | 8.5569  | -2.4463 |
| 32 | H    | 2.6265  | 9.0180  | -1.1944 |
| 33 | C    | -1.5953 | 11.4931 | 0.9359  |
| 34 | H    | -3.0243 | 8.8151  | 1.3822  |
| 35 | H    | -1.9039 | 7.5728  | 1.9990  |
| 36 | H    | -1.9164 | 9.1951  | 2.7289  |
| 37 | H    | 0.4513  | 12.3384 | -1.0688 |
| 38 | H    | 1.9924  | 11.4742 | -0.9512 |
| 39 | H    | 0.9112  | 11.1696 | -2.3168 |
| 40 | H    | -2.6642 | 11.3585 | 0.7264  |
| 41 | H    | -1.4868 | 11.6113 | 2.0219  |
| 42 | H    | -1.2760 | 12.4269 | 0.4650  |
| 43 | Ni   | -0.0638 | 6.2479  | 0.4244  |
| 44 | C    | -1.3978 | 6.1486  | -0.9309 |
| 45 | C    | -1.0601 | 6.1609  | -2.2994 |
| 46 | C    | -2.7694 | 6.0535  | -0.6207 |
| 47 | C    | -2.0326 | 6.0776  | -3.3027 |
| 48 | H    | -0.0149 | 6.2388  | -2.5920 |
| 49 | C    | -3.7499 | 5.9739  | -1.6167 |
| 50 | H    | -3.0827 | 6.0386  | 0.4213  |
| 51 | C    | -3.3866 | 5.9839  | -2.9667 |

|    |    |         |        |         |
|----|----|---------|--------|---------|
| 52 | H  | -1.7322 | 6.0878 | -4.3494 |
| 53 | H  | -4.8000 | 5.9027 | -1.3373 |
| 54 | H  | -4.1453 | 5.9207 | -3.7433 |
| 55 | Br | 1.7197  | 6.3542 | 2.1975  |



large\_basis\_B-6-Br\_NiBrIMes2\_bb  
 Energy (POTENTIAL) = -2031.65228445 Eh

|    | Atom | X       | Y       | Z       |
|----|------|---------|---------|---------|
| 1  | C    | -0.0785 | 0.0247  | -0.1954 |
| 2  | C    | 1.0134  | 0.7450  | -0.5480 |
| 3  | C    | 1.6317  | -1.4585 | -0.5206 |
| 4  | N    | 0.3133  | -1.3113 | -0.1849 |
| 5  | N    | 2.0418  | -0.1738 | -0.7477 |
| 6  | Ni   | 2.7077  | -3.0906 | -0.5932 |
| 7  | C    | 3.7882  | -4.5853 | -1.2455 |
| 8  | N    | 5.1070  | -4.8633 | -1.0117 |
| 9  | N    | 3.3783  | -5.6383 | -2.0147 |
| 10 | C    | 5.5003  | -6.0559 | -1.6135 |
| 11 | C    | 4.4073  | -6.5485 | -2.2450 |
| 12 | H    | 6.5097  | -6.4286 | -1.5338 |
| 13 | H    | 4.2577  | -7.4439 | -2.8281 |
| 14 | H    | -1.0864 | 0.3251  | 0.0451  |
| 15 | H    | 1.1629  | 1.8061  | -0.6744 |
| 16 | C    | 2.0584  | -5.7931 | -2.5619 |
| 17 | C    | 1.0500  | -6.3523 | -1.7636 |
| 18 | C    | 1.8369  | -5.4163 | -3.8966 |
| 19 | C    | -0.2054 | -6.5512 | -2.3480 |
| 20 | C    | 0.5645  | -5.6321 | -4.4348 |
| 21 | C    | -0.4669 | -6.1994 | -3.6764 |
| 22 | H    | -1.0000 | -6.9817 | -1.7439 |
| 23 | H    | 0.3731  | -5.3419 | -5.4657 |
| 24 | C    | 6.0144  | -4.0124 | -0.2910 |
| 25 | C    | 6.4858  | -2.8490 | -0.9139 |
| 26 | C    | 6.4326  | -4.3953 | 0.9950  |
| 27 | C    | 7.3937  | -2.0503 | -0.2074 |
| 28 | C    | 7.3322  | -3.5606 | 1.6627  |
| 29 | C    | 7.8218  | -2.3838 | 1.0801  |
| 30 | H    | 7.7711  | -1.1474 | -0.6794 |
| 31 | H    | 7.6559  | -3.8340 | 2.6648  |
| 32 | C    | -0.5962 | -2.3941 | 0.0746  |
| 33 | C    | -1.0616 | -3.1541 | -1.0087 |
| 34 | C    | -1.0221 | -2.6287 | 1.3909  |
| 35 | C    | -1.9654 | -4.1874 | -0.7425 |
| 36 | C    | -1.9226 | -3.6774 | 1.6074  |
| 37 | C    | -2.3955 | -4.4734 | 0.5576  |
| 38 | H    | -2.3374 | -4.7832 | -1.5718 |
| 39 | H    | -2.2558 | -3.8808 | 2.6228  |
| 40 | C    | 3.3606  | 0.2133  | -1.1690 |
| 41 | C    | 4.3777  | 0.3249  | -0.2104 |
| 42 | C    | 3.5705  | 0.5184  | -2.5248 |
| 43 | C    | 5.6275  | 0.7857  | -0.6395 |
| 44 | C    | 4.8390  | 0.9651  | -2.9058 |
| 45 | C    | 5.8771  | 1.1103  | -1.9763 |
| 46 | H    | 6.4258  | 0.8828  | 0.0917  |
| 47 | H    | 5.0223  | 1.2012  | -3.9519 |
| 48 | C    | 2.9328  | -4.7726 | -4.7104 |
| 49 | H    | 3.3104  | -3.8709 | -4.2122 |
| 50 | H    | 3.7898  | -5.4435 | -4.8451 |
| 51 | H    | 2.5669  | -4.4872 | -5.7013 |

|    |    |         |         |         |
|----|----|---------|---------|---------|
| 52 | C  | 1.3072  | -6.6931 | -0.3196 |
| 53 | H  | 2.1687  | -7.3638 | -0.2100 |
| 54 | H  | 1.5373  | -5.7878 | 0.2568  |
| 55 | H  | 0.4335  | -7.1760 | 0.1293  |
| 56 | C  | -1.8507 | -6.3627 | -4.2568 |
| 57 | H  | -1.8173 | -6.5717 | -5.3319 |
| 58 | H  | -2.4008 | -7.1731 | -3.7662 |
| 59 | H  | -2.4378 | -5.4429 | -4.1238 |
| 60 | C  | 5.9111  | -5.6545 | 1.6380  |
| 61 | H  | 6.2015  | -6.5501 | 1.0749  |
| 62 | H  | 6.2973  | -5.7585 | 2.6569  |
| 63 | H  | 4.8169  | -5.6258 | 1.6864  |
| 64 | C  | 6.0195  | -2.4519 | -2.2918 |
| 65 | H  | 6.0390  | -3.3006 | -2.9858 |
| 66 | H  | 4.9870  | -2.0843 | -2.2567 |
| 67 | H  | 6.6474  | -1.6566 | -2.7020 |
| 68 | C  | 8.8027  | -1.5111 | 1.8271  |
| 69 | H  | 9.7826  | -1.9988 | 1.9162  |
| 70 | H  | 8.9544  | -0.5515 | 1.3214  |
| 71 | H  | 8.4545  | -1.3055 | 2.8466  |
| 72 | C  | 4.1390  | -0.0700 | 1.2231  |
| 73 | H  | 3.2732  | 0.4537  | 1.6473  |
| 74 | H  | 3.9248  | -1.1437 | 1.2988  |
| 75 | H  | 5.0147  | 0.1518  | 1.8407  |
| 76 | C  | 2.4652  | 0.3466  | -3.5380 |
| 77 | H  | 1.6086  | 0.9966  | -3.3223 |
| 78 | H  | 2.8202  | 0.5792  | -4.5466 |
| 79 | H  | 2.0883  | -0.6836 | -3.5375 |
| 80 | C  | 7.2510  | 1.5485  | -2.4224 |
| 81 | H  | 7.1973  | 2.3416  | -3.1773 |
| 82 | H  | 7.8497  | 1.9154  | -1.5818 |
| 83 | H  | 7.7993  | 0.7112  | -2.8761 |
| 84 | C  | -0.5954 | -2.8783 | -2.4159 |
| 85 | H  | -0.6255 | -1.8076 | -2.6495 |
| 86 | H  | 0.4404  | -3.2105 | -2.5476 |
| 87 | H  | -1.2145 | -3.4091 | -3.1438 |
| 88 | C  | -0.5169 | -1.7839 | 2.5321  |
| 89 | H  | -0.8655 | -0.7460 | 2.4560  |
| 90 | H  | -0.8598 | -2.1828 | 3.4919  |
| 91 | H  | 0.5781  | -1.7742 | 2.5376  |
| 92 | C  | -3.3246 | -5.6346 | 0.8198  |
| 93 | H  | -3.8911 | -5.4978 | 1.7473  |
| 94 | H  | -4.0379 | -5.7734 | -0.0008 |
| 95 | H  | -2.7591 | -6.5716 | 0.9186  |
| 96 | Br | 2.6642  | -3.7086 | 1.9328  |

large\_basis\_PhCl\_PhCl\_bb

Energy (POTENTIAL) = -691.950431153 Eh

|    | Atom | X       | Y       | Z       |
|----|------|---------|---------|---------|
| 1  | C    | -2.2260 | 0.0425  | 0.0001  |
| 2  | C    | -0.8288 | 0.0325  | 0.0006  |
| 3  | C    | -0.1506 | 1.2514  | -0.0000 |
| 4  | C    | -0.8287 | 2.4704  | -0.0010 |
| 5  | C    | -2.2259 | 2.4606  | -0.0015 |
| 6  | C    | -2.9261 | 1.2516  | -0.0010 |
| 7  | H    | -2.7636 | -0.9017 | 0.0005  |
| 8  | H    | -0.2783 | -0.9026 | 0.0013  |
| 9  | H    | -0.2781 | 3.4054  | -0.0014 |
| 10 | H    | -2.7634 | 3.4048  | -0.0023 |
| 11 | H    | -4.0123 | 1.2516  | -0.0014 |
| 12 | Cl   | 1.6179  | 1.2514  | 0.0006  |

large\_basis\_TS-A-5-6-I\_NiITMe2\_IPh\_ossts\_t\_ts\_bb  
Energy (POTENTIAL) = -1179.66802572 Eh

|    | Atom | X       | Y       | Z       |
|----|------|---------|---------|---------|
| 1  | C    | -0.9927 | 1.7727  | 0.1472  |
| 2  | C    | 0.0286  | 2.5877  | -0.2508 |
| 3  | C    | 0.7618  | 0.4238  | -0.4532 |
| 4  | N    | -0.5243 | 0.4664  | 0.0110  |
| 5  | N    | 1.0803  | 1.7449  | -0.6105 |
| 6  | Ni   | 1.8537  | -1.1003 | -0.7579 |
| 7  | C    | 2.8962  | -2.6008 | -1.2834 |
| 8  | N    | 4.2191  | -2.8604 | -1.0528 |
| 9  | N    | 2.4692  | -3.7211 | -1.9434 |
| 10 | C    | 4.6039  | -4.1091 | -1.5394 |
| 11 | C    | 3.4900  | -4.6567 | -2.1095 |
| 12 | C    | 2.2763  | -2.1725 | 4.1708  |
| 13 | C    | 2.2468  | -3.5036 | 4.5970  |
| 14 | C    | 2.4463  | -1.1476 | 5.1064  |
| 15 | C    | 2.3851  | -3.8091 | 5.9564  |
| 16 | H    | 2.1170  | -4.3067 | 3.8736  |
| 17 | C    | 2.5852  | -1.4540 | 6.4658  |
| 18 | H    | 2.4720  | -0.1086 | 4.7822  |
| 19 | C    | 2.5545  | -2.7849 | 6.8929  |
| 20 | H    | 2.3611  | -4.8471 | 6.2825  |
| 21 | H    | 2.7170  | -0.6524 | 7.1900  |
| 22 | H    | 2.6624  | -3.0223 | 7.9483  |
| 23 | I    | 2.0641  | -1.6791 | 1.9503  |
| 24 | C    | -1.3048 | -0.7118 | 0.3569  |
| 25 | H    | -2.2467 | -0.7225 | -0.2009 |
| 26 | H    | -0.7165 | -1.5929 | 0.0976  |
| 27 | H    | -1.5221 | -0.7294 | 1.4297  |
| 28 | C    | 2.3704  | 2.2174  | -1.0884 |
| 29 | H    | 2.8410  | 2.8678  | -0.3441 |
| 30 | H    | 3.0032  | 1.3438  | -1.2579 |
| 31 | H    | 2.2558  | 2.7714  | -2.0260 |
| 32 | C    | 0.1259  | 4.0737  | -0.3346 |
| 33 | H    | -0.8125 | 4.5361  | -0.0155 |
| 34 | H    | 0.9270  | 4.4646  | 0.3060  |
| 35 | H    | 0.3348  | 4.4094  | -1.3586 |
| 36 | C    | -2.3657 | 2.0857  | 0.6377  |
| 37 | H    | -3.1378 | 1.6625  | -0.0181 |
| 38 | H    | -2.5369 | 1.6835  | 1.6444  |
| 39 | H    | -2.5182 | 3.1677  | 0.6782  |
| 40 | C    | 5.1126  | -1.9632 | -0.3367 |
| 41 | H    | 6.0054  | -1.7575 | -0.9358 |
| 42 | H    | 4.5756  | -1.0329 | -0.1480 |
| 43 | H    | 5.4129  | -2.4020 | 0.6202  |
| 44 | C    | 1.0991  | -3.9344 | -2.3829 |
| 45 | H    | 0.5275  | -3.0344 | -2.1471 |
| 46 | H    | 1.0646  | -4.1159 | -3.4621 |
| 47 | H    | 0.6575  | -4.7902 | -1.8614 |
| 48 | C    | 3.2824  | -5.9592 | -2.8056 |
| 49 | H    | 4.2085  | -6.5409 | -2.8083 |
| 50 | H    | 2.5073  | -6.5629 | -2.3164 |
| 51 | H    | 2.9735  | -5.8171 | -3.8495 |

|    |   |        |         |         |
|----|---|--------|---------|---------|
| 52 | C | 5.9938 | -4.6318 | -1.4030 |
| 53 | H | 6.7217 | -3.9969 | -1.9247 |
| 54 | H | 6.3033 | -4.6851 | -0.3514 |
| 55 | H | 6.0648 | -5.6383 | -1.8245 |

large\_basis\_TS-B-5-6-I\_NiIMes2\_ossts\_PhI\_t\_ossts\_bb  
 Energy (POTENTIAL) = -2261.50730351 Eh

|    | Atom | X       | Y       | Z       |
|----|------|---------|---------|---------|
| 1  | C    | -1.1701 | 1.7706  | -0.0002 |
| 2  | C    | -0.0990 | 2.5150  | -0.3676 |
| 3  | C    | 0.5638  | 0.3183  | -0.3855 |
| 4  | N    | -0.7547 | 0.4412  | -0.0141 |
| 5  | N    | 0.9447  | 1.6197  | -0.5953 |
| 6  | Ni   | 1.6540  | -1.1999 | -0.5970 |
| 7  | C    | 2.7856  | -2.6566 | -1.0657 |
| 8  | N    | 4.0442  | -3.0184 | -0.6395 |
| 9  | N    | 2.5061  | -3.6027 | -2.0182 |
| 10 | C    | 4.5173  | -4.1430 | -1.3100 |
| 11 | C    | 3.5475  | -4.5134 | -2.1806 |
| 12 | H    | 5.4896  | -4.5626 | -1.1036 |
| 13 | H    | 3.4932  | -5.3238 | -2.8911 |
| 14 | H    | -2.1772 | 2.0507  | 0.2667  |
| 15 | H    | 0.0252  | 3.5801  | -0.4888 |
| 16 | C    | 1.2749  | -3.6821 | -2.7527 |
| 17 | C    | 0.1876  | -4.3583 | -2.1804 |
| 18 | C    | 1.2165  | -3.1210 | -4.0387 |
| 19 | C    | -0.9658 | -4.5120 | -2.9575 |
| 20 | C    | 0.0382  | -3.2884 | -4.7720 |
| 21 | C    | -1.0560 | -3.9935 | -4.2536 |
| 22 | H    | -1.8157 | -5.0413 | -2.5335 |
| 23 | H    | -0.0281 | -2.8582 | -5.7692 |
| 24 | C    | 4.7824  | -2.3350 | 0.3852  |
| 25 | C    | 5.2974  | -1.0614 | 0.1134  |
| 26 | C    | 4.9352  | -2.9504 | 1.6405  |
| 27 | C    | 5.9320  | -0.3741 | 1.1566  |
| 28 | C    | 5.5855  | -2.2316 | 2.6454  |
| 29 | C    | 6.0725  | -0.9357 | 2.4288  |
| 30 | H    | 6.3174  | 0.6252  | 0.9662  |
| 31 | H    | 5.6816  | -2.6793 | 3.6319  |
| 32 | C    | -1.6167 | -0.6739 | 0.2545  |
| 33 | C    | -2.0124 | -1.4872 | -0.8214 |
| 34 | C    | -2.0560 | -0.9094 | 1.5669  |
| 35 | C    | -2.8172 | -2.5955 | -0.5428 |
| 36 | C    | -2.8589 | -2.0333 | 1.7952  |
| 37 | C    | -3.2351 | -2.8953 | 0.7593  |
| 38 | H    | -3.1262 | -3.2373 | -1.3641 |
| 39 | H    | -3.1950 | -2.2393 | 2.8092  |
| 40 | C    | 2.2405  | 2.0232  | -1.0648 |
| 41 | C    | 3.1939  | 2.4718  | -0.1382 |
| 42 | C    | 2.4953  | 1.9926  | -2.4452 |
| 43 | C    | 4.4144  | 2.9424  | -0.6340 |
| 44 | C    | 3.7341  | 2.4639  | -2.8929 |
| 45 | C    | 4.6989  | 2.9535  | -2.0046 |
| 46 | H    | 5.1638  | 3.2990  | 0.0693  |
| 47 | H    | 3.9492  | 2.4478  | -3.9593 |
| 48 | C    | 2.3847  | -2.3366 | -4.5828 |
| 49 | H    | 2.6639  | -1.5317 | -3.8915 |
| 50 | H    | 3.2731  | -2.9675 | -4.7111 |
| 51 | H    | 2.1412  | -1.8906 | -5.5519 |

|     |   |         |         |         |
|-----|---|---------|---------|---------|
| 52  | C | 0.2518  | -4.8500 | -0.7575 |
| 53  | H | 1.1126  | -5.5094 | -0.5917 |
| 54  | H | 0.3660  | -3.9988 | -0.0739 |
| 55  | H | -0.6580 | -5.3935 | -0.4857 |
| 56  | C | -2.3266 | -4.1319 | -5.0574 |
| 57  | H | -2.1147 | -4.3646 | -6.1075 |
| 58  | H | -2.9735 | -4.9194 | -4.6562 |
| 59  | H | -2.9011 | -3.1954 | -5.0454 |
| 60  | C | 4.3695  | -4.3213 | 1.9168  |
| 61  | H | 4.9371  | -5.1083 | 1.4042  |
| 62  | H | 4.3871  | -4.5370 | 2.9890  |
| 63  | H | 3.3318  | -4.3918 | 1.5738  |
| 64  | C | 5.1518  | -0.4378 | -1.2504 |
| 65  | H | 5.3511  | -1.1636 | -2.0476 |
| 66  | H | 4.1297  | -0.0717 | -1.3982 |
| 67  | H | 5.8363  | 0.4057  | -1.3693 |
| 68  | C | 6.7192  | -0.1723 | 3.5597  |
| 69  | H | 7.5934  | -0.7056 | 3.9545  |
| 70  | H | 7.0464  | 0.8228  | 3.2402  |
| 71  | H | 6.0174  | -0.0467 | 4.3943  |
| 72  | C | 2.9200  | 2.4049  | 1.3427  |
| 73  | H | 2.0180  | 2.9644  | 1.6185  |
| 74  | H | 2.7590  | 1.3648  | 1.6523  |
| 75  | H | 3.7616  | 2.8069  | 1.9151  |
| 76  | C | 1.4708  | 1.4342  | -3.4005 |
| 77  | H | 0.5305  | 1.9983  | -3.3616 |
| 78  | H | 1.8400  | 1.4534  | -4.4305 |
| 79  | H | 1.2304  | 0.3970  | -3.1355 |
| 80  | C | 6.0428  | 3.4243  | -2.5062 |
| 81  | H | 5.9826  | 3.7911  | -3.5367 |
| 82  | H | 6.4476  | 4.2268  | -1.8794 |
| 83  | H | 6.7739  | 2.6038  | -2.4947 |
| 84  | C | -1.5755 | -1.1830 | -2.2314 |
| 85  | H | -1.6393 | -0.1108 | -2.4492 |
| 86  | H | -0.5314 | -1.4811 | -2.3802 |
| 87  | H | -2.1916 | -1.7225 | -2.9549 |
| 88  | C | -1.7069 | 0.0263  | 2.6983  |
| 89  | H | -2.3687 | 0.9030  | 2.7049  |
| 90  | H | -1.8151 | -0.4755 | 3.6650  |
| 91  | H | -0.6792 | 0.3905  | 2.6189  |
| 92  | C | -4.0526 | -4.1339 | 1.0379  |
| 93  | H | -4.6399 | -4.0321 | 1.9570  |
| 94  | H | -4.7409 | -4.3566 | 0.2143  |
| 95  | H | -3.4018 | -5.0103 | 1.1622  |
| 96  | C | 2.2772  | -2.1072 | 4.3017  |
| 97  | C | 2.0877  | -3.3871 | 4.8311  |
| 98  | C | 2.9857  | -1.1492 | 5.0346  |
| 99  | C | 2.6021  | -3.7067 | 6.0941  |
| 100 | H | 1.5500  | -4.1410 | 4.2592  |
| 101 | C | 3.4968  | -1.4690 | 6.2982  |
| 102 | H | 3.1523  | -0.1580 | 4.6175  |
| 103 | C | 3.3084  | -2.7494 | 6.8288  |
| 104 | H | 2.4522  | -4.7044 | 6.5021  |
| 105 | H | 4.0454  | -0.7193 | 6.8652  |
| 106 | H | 3.7099  | -2.9997 | 7.8076  |

107

I

1.6861

-1.6389

2.1452



large\_basis\_TS-D-5-6-Cl\_NiIPhen2\_ossts\_PhCl\_t\_bb  
Energy (POTENTIAL) = -2238.31537306 Eh

|    | Atom | X       | Y       | Z       |
|----|------|---------|---------|---------|
| 1  | C    | -0.2933 | 1.1673  | 0.5594  |
| 2  | C    | 0.7123  | 1.8786  | -0.0016 |
| 3  | C    | 1.2008  | -0.3461 | -0.3015 |
| 4  | N    | 0.0089  | -0.1803 | 0.3616  |
| 5  | N    | 1.6050  | 0.9499  | -0.5312 |
| 6  | Ni   | 2.2523  | -1.8840 | -0.6960 |
| 7  | C    | 3.4867  | -3.1882 | -1.3216 |
| 8  | N    | 4.7835  | -3.3811 | -0.9090 |
| 9  | N    | 3.3277  | -4.1469 | -2.2939 |
| 10 | C    | 5.3998  | -4.4231 | -1.6007 |
| 11 | C    | 4.4867  | -4.9010 | -2.4781 |
| 12 | H    | 6.4232  | -4.7091 | -1.4142 |
| 13 | H    | 4.5409  | -5.7076 | -3.1925 |
| 14 | H    | -1.2030 | 1.4862  | 1.0435  |
| 15 | H    | 0.8627  | 2.9423  | -0.1022 |
| 16 | C    | 2.1100  | -4.3674 | -3.0050 |
| 17 | C    | 0.8984  | -4.4070 | -2.3055 |
| 18 | C    | 2.1383  | -4.5468 | -4.3906 |
| 19 | C    | -0.2909 | -4.6083 | -3.0068 |
| 20 | C    | 0.9428  | -4.7618 | -5.0809 |
| 21 | C    | -0.2734 | -4.7868 | -4.3936 |
| 22 | H    | -1.2320 | -4.6362 | -2.4643 |
| 23 | H    | 0.9648  | -4.8984 | -6.1586 |
| 24 | C    | 5.4239  | -2.6271 | 0.1226  |
| 25 | C    | 5.3476  | -1.2311 | 0.1199  |
| 26 | C    | 6.1212  | -3.2995 | 1.1297  |
| 27 | C    | 5.9590  | -0.5095 | 1.1454  |
| 28 | C    | 6.7421  | -2.5672 | 2.1444  |
| 29 | C    | 6.6575  | -1.1724 | 2.1587  |
| 30 | H    | 5.8926  | 0.5747  | 1.1416  |
| 31 | H    | 7.2794  | -3.0915 | 2.9299  |
| 32 | C    | -0.8229 | -1.2488 | 0.8104  |
| 33 | C    | -1.0635 | -2.3400 | -0.0290 |
| 34 | C    | -1.3951 | -1.1912 | 2.0837  |
| 35 | C    | -1.8668 | -3.3871 | 0.4203  |
| 36 | C    | -2.2107 | -2.2374 | 2.5192  |
| 37 | C    | -2.4446 | -3.3399 | 1.6930  |
| 38 | H    | -2.0469 | -4.2395 | -0.2291 |
| 39 | H    | -2.6492 | -2.1950 | 3.5124  |
| 40 | C    | 2.8293  | 1.2876  | -1.1795 |
| 41 | C    | 3.6943  | 2.2132  | -0.5905 |
| 42 | C    | 3.1660  | 0.6660  | -2.3876 |
| 43 | C    | 4.9094  | 2.5117  | -1.2125 |
| 44 | C    | 4.3878  | 0.9612  | -2.9943 |
| 45 | C    | 5.2621  | 1.8823  | -2.4093 |
| 46 | H    | 5.5852  | 3.2262  | -0.7510 |
| 47 | H    | 4.6520  | 0.4722  | -3.9278 |
| 48 | C    | 2.1202  | -3.5693 | 3.5566  |
| 49 | C    | 0.9164  | -3.9306 | 4.1488  |
| 50 | C    | 3.3162  | -3.5716 | 4.2639  |
| 51 | C    | 0.9126  | -4.3144 | 5.4971  |

|    |    |         |         |         |
|----|----|---------|---------|---------|
| 52 | H  | -0.0077 | -3.9116 | 3.5746  |
| 53 | C  | 3.3069  | -3.9562 | 5.6116  |
| 54 | H  | 4.2443  | -3.2768 | 3.7773  |
| 55 | C  | 2.1063  | -4.3274 | 6.2273  |
| 56 | H  | -0.0213 | -4.6018 | 5.9771  |
| 57 | H  | 4.2354  | -3.9653 | 6.1800  |
| 58 | H  | 2.1006  | -4.6241 | 7.2733  |
| 59 | Cl | 2.1356  | -2.9196 | 1.5793  |
| 60 | H  | 3.4280  | 2.6720  | 0.3570  |
| 61 | H  | 6.2120  | 2.1094  | -2.8850 |
| 62 | H  | 2.4772  | -0.0441 | -2.8330 |
| 63 | H  | 7.1342  | -0.6059 | 2.9540  |
| 64 | H  | -1.1811 | -0.3498 | 2.7357  |
| 65 | H  | -3.0738 | -4.1559 | 2.0377  |
| 66 | H  | -0.6084 | -2.3649 | -1.0123 |
| 67 | H  | 3.0840  | -4.5014 | -4.9228 |
| 68 | H  | -1.2018 | -4.9484 | -4.9345 |
| 69 | H  | 0.9008  | -4.2765 | -1.2291 |
| 70 | H  | 6.1540  | -4.3849 | 1.1317  |
| 71 | H  | 4.8132  | -0.7240 | -0.6745 |

large\_basis\_IXy\_IXy\_bb

Energy (POTENTIAL) = -845.819164274 Eh

|    | Atom | X       | Y       | Z       |
|----|------|---------|---------|---------|
| 1  | C    | -0.5381 | 1.1362  | -0.0969 |
| 2  | C    | 0.5597  | 1.8919  | -0.3421 |
| 3  | C    | 1.1868  | -0.3181 | -0.6044 |
| 4  | N    | -0.1359 | -0.1914 | -0.2626 |
| 5  | N    | 1.5848  | 0.9931  | -0.6453 |
| 6  | H    | -1.5471 | 1.4068  | 0.1758  |
| 7  | H    | 0.7112  | 2.9608  | -0.3298 |
| 8  | C    | -1.0199 | -1.3079 | -0.0670 |
| 9  | C    | -1.8481 | -1.7135 | -1.1269 |
| 10 | C    | -1.0360 | -1.9424 | 1.1865  |
| 11 | C    | -2.7139 | -2.7923 | -0.9058 |
| 12 | C    | -1.9144 | -3.0182 | 1.3660  |
| 13 | C    | -2.7477 | -3.4397 | 0.3294  |
| 14 | H    | -3.3625 | -3.1246 | -1.7123 |
| 15 | H    | -1.9428 | -3.5254 | 2.3271  |
| 16 | C    | 2.9214  | 1.4088  | -0.9692 |
| 17 | C    | 3.8451  | 1.5909  | 0.0731  |
| 18 | C    | 3.2503  | 1.6343  | -2.3158 |
| 19 | C    | 5.1366  | 2.0162  | -0.2630 |
| 20 | C    | 4.5519  | 2.0589  | -2.6105 |
| 21 | C    | 5.4875  | 2.2495  | -1.5931 |
| 22 | H    | 5.8686  | 2.1635  | 0.5271  |
| 23 | H    | 4.8292  | 2.2396  | -3.6461 |
| 24 | C    | 3.4519  | 1.3308  | 1.5059  |
| 25 | H    | 2.6197  | 1.9740  | 1.8174  |
| 26 | H    | 3.1175  | 0.2957  | 1.6414  |
| 27 | H    | 4.2933  | 1.5113  | 2.1818  |
| 28 | C    | 2.2294  | 1.4119  | -3.4036 |
| 29 | H    | 1.3273  | 2.0131  | -3.2377 |
| 30 | H    | 2.6379  | 1.6713  | -4.3850 |
| 31 | H    | 1.9091  | 0.3638  | -3.4297 |
| 32 | C    | -1.7929 | -1.0176 | -2.4644 |
| 33 | H    | -1.9964 | 0.0559  | -2.3723 |
| 34 | H    | -0.7987 | -1.1125 | -2.9169 |
| 35 | H    | -2.5243 | -1.4440 | -3.1578 |
| 36 | C    | -0.1228 | -1.4820 | 2.2954  |
| 37 | H    | -0.2448 | -0.4113 | 2.4989  |
| 38 | H    | -0.3207 | -2.0316 | 3.2207  |
| 39 | H    | 0.9286  | -1.6335 | 2.0248  |
| 40 | H    | -3.4252 | -4.2754 | 0.4846  |
| 41 | H    | 6.4939  | 2.5794  | -1.8379 |

large\_basis\_B-6-Cl\_NiClIMes2\_bb  
 Energy (POTENTIAL) = -2478.70682012 Eh

|    | Atom | X       | Y       | Z       |
|----|------|---------|---------|---------|
| 1  | C    | -0.0084 | 0.0587  | -0.1487 |
| 2  | C    | 1.1352  | 0.7744  | -0.2782 |
| 3  | C    | 1.6954  | -1.4366 | -0.4528 |
| 4  | N    | 0.3509  | -1.2820 | -0.2580 |
| 5  | N    | 2.1590  | -0.1518 | -0.4656 |
| 6  | Ni   | 2.7120  | -3.0963 | -0.5885 |
| 7  | C    | 3.7232  | -4.6137 | -1.2824 |
| 8  | N    | 5.0706  | -4.8342 | -1.2231 |
| 9  | N    | 3.2477  | -5.7383 | -1.8935 |
| 10 | C    | 5.4212  | -6.0619 | -1.7799 |
| 11 | C    | 4.2683  | -6.6347 | -2.2033 |
| 12 | H    | 6.4455  | -6.3989 | -1.8196 |
| 13 | H    | 4.0713  | -7.5782 | -2.6886 |
| 14 | H    | -1.0315 | 0.3644  | 0.0067  |
| 15 | H    | 1.3240  | 1.8367  | -0.2575 |
| 16 | C    | 1.8734  | -5.9786 | -2.2383 |
| 17 | C    | 1.0563  | -6.6756 | -1.3380 |
| 18 | C    | 1.4151  | -5.5533 | -3.4954 |
| 19 | C    | -0.2435 | -6.9916 | -1.7510 |
| 20 | C    | 0.1090  | -5.8884 | -3.8616 |
| 21 | C    | -0.7263 | -6.6244 | -3.0109 |
| 22 | H    | -0.8927 | -7.5348 | -1.0682 |
| 23 | H    | -0.2643 | -5.5701 | -4.8329 |
| 24 | C    | 6.0367  | -3.8928 | -0.7261 |
| 25 | C    | 6.4225  | -2.8296 | -1.5569 |
| 26 | C    | 6.5989  | -4.0944 | 0.5442  |
| 27 | C    | 7.4132  | -1.9620 | -1.0894 |
| 28 | C    | 7.5769  | -3.1905 | 0.9731  |
| 29 | C    | 7.9972  | -2.1226 | 0.1721  |
| 30 | H    | 7.7312  | -1.1396 | -1.7235 |
| 31 | H    | 8.0210  | -3.3266 | 1.9568  |
| 32 | C    | -0.6017 | -2.3581 | -0.2319 |
| 33 | C    | -1.0408 | -2.8936 | -1.4518 |
| 34 | C    | -1.0954 | -2.8023 | 1.0046  |
| 35 | C    | -2.0024 | -3.9073 | -1.4105 |
| 36 | C    | -2.0449 | -3.8290 | 0.9942  |
| 37 | C    | -2.5089 | -4.3930 | -0.2002 |
| 38 | H    | -2.3593 | -4.3289 | -2.3453 |
| 39 | H    | -2.4322 | -4.1944 | 1.9428  |
| 40 | C    | 3.5252  | 0.2373  | -0.6846 |
| 41 | C    | 4.3725  | 0.3973  | 0.4203  |
| 42 | C    | 3.9462  | 0.4966  | -1.9985 |
| 43 | C    | 5.6658  | 0.8778  | 0.1836  |
| 44 | C    | 5.2473  | 0.9717  | -2.1855 |
| 45 | C    | 6.1135  | 1.1849  | -1.1055 |
| 46 | H    | 6.3377  | 1.0126  | 1.0280  |
| 47 | H    | 5.5912  | 1.1808  | -3.1963 |
| 48 | C    | 2.3052  | -4.7387 | -4.4003 |
| 49 | H    | 2.6422  | -3.8269 | -3.8918 |
| 50 | H    | 3.2080  | -5.2921 | -4.6873 |
| 51 | H    | 1.7772  | -4.4480 | -5.3136 |

|    |    |         |         |         |
|----|----|---------|---------|---------|
| 52 | C  | 1.5623  | -7.0429 | 0.0331  |
| 53 | H  | 2.4690  | -7.6583 | -0.0212 |
| 54 | H  | 1.8224  | -6.1394 | 0.5999  |
| 55 | H  | 0.8040  | -7.5979 | 0.5941  |
| 56 | C  | -2.1182 | -7.0080 | -3.4533 |
| 57 | H  | -2.0862 | -7.8203 | -4.1919 |
| 58 | H  | -2.7283 | -7.3492 | -2.6113 |
| 59 | H  | -2.6347 | -6.1657 | -3.9289 |
| 60 | C  | 6.1426  | -5.2296 | 1.4249  |
| 61 | H  | 6.2507  | -6.2018 | 0.9294  |
| 62 | H  | 6.7190  | -5.2569 | 2.3551  |
| 63 | H  | 5.0825  | -5.1040 | 1.6775  |
| 64 | C  | 5.7727  | -2.6226 | -2.9018 |
| 65 | H  | 5.8035  | -3.5336 | -3.5118 |
| 66 | H  | 4.7168  | -2.3557 | -2.7756 |
| 67 | H  | 6.2651  | -1.8183 | -3.4559 |
| 68 | C  | 9.0310  | -1.1433 | 0.6733  |
| 69 | H  | 9.7436  | -1.6221 | 1.3542  |
| 70 | H  | 9.5943  | -0.6938 | -0.1517 |
| 71 | H  | 8.5531  | -0.3242 | 1.2273  |
| 72 | C  | 3.8959  | 0.0547  | 1.8082  |
| 73 | H  | 3.0253  | 0.6584  | 2.0947  |
| 74 | H  | 3.5883  | -0.9973 | 1.8628  |
| 75 | H  | 4.6866  | 0.2239  | 2.5458  |
| 76 | C  | 3.0250  | 0.2438  | -3.1658 |
| 77 | H  | 2.0971  | 0.8229  | -3.0841 |
| 78 | H  | 3.5090  | 0.5049  | -4.1118 |
| 79 | H  | 2.7329  | -0.8129 | -3.2100 |
| 80 | C  | 7.4982  | 1.7425  | -1.3342 |
| 81 | H  | 7.4600  | 2.8238  | -1.5237 |
| 82 | H  | 8.1441  | 1.5818  | -0.4656 |
| 83 | H  | 7.9783  | 1.2827  | -2.2060 |
| 84 | C  | -0.4786 | -2.4004 | -2.7615 |
| 85 | H  | -0.5493 | -1.3090 | -2.8464 |
| 86 | H  | 0.5836  | -2.6594 | -2.8445 |
| 87 | H  | -1.0064 | -2.8480 | -3.6087 |
| 88 | C  | -0.5990 | -2.2048 | 2.2965  |
| 89 | H  | -0.7824 | -1.1243 | 2.3419  |
| 90 | H  | -1.0945 | -2.6688 | 3.1552  |
| 91 | H  | 0.4817  | -2.3619 | 2.3930  |
| 92 | C  | -3.5034 | -5.5286 | -0.1785 |
| 93 | H  | -4.2338 | -5.4113 | 0.6304  |
| 94 | H  | -4.0496 | -5.6051 | -1.1247 |
| 95 | H  | -2.9928 | -6.4873 | -0.0156 |
| 96 | Cl | 2.7341  | -3.7349 | 1.7725  |

large\_basis\_TS-B-5-6-I\_NiIMes2\_ossts\_PhI\_t\_bb

Energy (POTENTIAL) = -2261.48124081 Eh

|    | Atom | X       | Y       | Z       |
|----|------|---------|---------|---------|
| 1  | C    | -1.1701 | 1.7706  | -0.0002 |
| 2  | C    | -0.0990 | 2.5150  | -0.3676 |
| 3  | C    | 0.5638  | 0.3183  | -0.3855 |
| 4  | N    | -0.7547 | 0.4412  | -0.0141 |
| 5  | N    | 0.9447  | 1.6197  | -0.5953 |
| 6  | Ni   | 1.6540  | -1.1999 | -0.5970 |
| 7  | C    | 2.7856  | -2.6566 | -1.0657 |
| 8  | N    | 4.0442  | -3.0184 | -0.6395 |
| 9  | N    | 2.5061  | -3.6027 | -2.0182 |
| 10 | C    | 4.5173  | -4.1430 | -1.3100 |
| 11 | C    | 3.5475  | -4.5134 | -2.1806 |
| 12 | H    | 5.4896  | -4.5626 | -1.1036 |
| 13 | H    | 3.4932  | -5.3238 | -2.8911 |
| 14 | H    | -2.1772 | 2.0507  | 0.2667  |
| 15 | H    | 0.0252  | 3.5801  | -0.4888 |
| 16 | C    | 1.2749  | -3.6821 | -2.7527 |
| 17 | C    | 0.1876  | -4.3583 | -2.1804 |
| 18 | C    | 1.2165  | -3.1210 | -4.0387 |
| 19 | C    | -0.9658 | -4.5120 | -2.9575 |
| 20 | C    | 0.0382  | -3.2884 | -4.7720 |
| 21 | C    | -1.0560 | -3.9935 | -4.2536 |
| 22 | H    | -1.8157 | -5.0413 | -2.5335 |
| 23 | H    | -0.0281 | -2.8582 | -5.7692 |
| 24 | C    | 4.7824  | -2.3350 | 0.3852  |
| 25 | C    | 5.2974  | -1.0614 | 0.1134  |
| 26 | C    | 4.9352  | -2.9504 | 1.6405  |
| 27 | C    | 5.9320  | -0.3741 | 1.1566  |
| 28 | C    | 5.5855  | -2.2316 | 2.6454  |
| 29 | C    | 6.0725  | -0.9357 | 2.4288  |
| 30 | H    | 6.3174  | 0.6252  | 0.9662  |
| 31 | H    | 5.6816  | -2.6793 | 3.6319  |
| 32 | C    | -1.6167 | -0.6739 | 0.2545  |
| 33 | C    | -2.0124 | -1.4872 | -0.8214 |
| 34 | C    | -2.0560 | -0.9094 | 1.5669  |
| 35 | C    | -2.8172 | -2.5955 | -0.5428 |
| 36 | C    | -2.8589 | -2.0333 | 1.7952  |
| 37 | C    | -3.2351 | -2.8953 | 0.7593  |
| 38 | H    | -3.1262 | -3.2373 | -1.3641 |
| 39 | H    | -3.1950 | -2.2393 | 2.8092  |
| 40 | C    | 2.2405  | 2.0232  | -1.0648 |
| 41 | C    | 3.1939  | 2.4718  | -0.1382 |
| 42 | C    | 2.4953  | 1.9926  | -2.4452 |
| 43 | C    | 4.4144  | 2.9424  | -0.6340 |
| 44 | C    | 3.7341  | 2.4639  | -2.8929 |
| 45 | C    | 4.6989  | 2.9535  | -2.0046 |
| 46 | H    | 5.1638  | 3.2990  | 0.0693  |
| 47 | H    | 3.9492  | 2.4478  | -3.9593 |
| 48 | C    | 2.3847  | -2.3366 | -4.5828 |
| 49 | H    | 2.6639  | -1.5317 | -3.8915 |
| 50 | H    | 3.2731  | -2.9675 | -4.7111 |
| 51 | H    | 2.1412  | -1.8906 | -5.5519 |

|     |   |         |         |         |
|-----|---|---------|---------|---------|
| 52  | C | 0.2518  | -4.8500 | -0.7575 |
| 53  | H | 1.1126  | -5.5094 | -0.5917 |
| 54  | H | 0.3660  | -3.9988 | -0.0739 |
| 55  | H | -0.6580 | -5.3935 | -0.4857 |
| 56  | C | -2.3266 | -4.1319 | -5.0574 |
| 57  | H | -2.1147 | -4.3646 | -6.1075 |
| 58  | H | -2.9735 | -4.9194 | -4.6562 |
| 59  | H | -2.9011 | -3.1954 | -5.0454 |
| 60  | C | 4.3695  | -4.3213 | 1.9168  |
| 61  | H | 4.9371  | -5.1083 | 1.4042  |
| 62  | H | 4.3871  | -4.5370 | 2.9890  |
| 63  | H | 3.3318  | -4.3918 | 1.5738  |
| 64  | C | 5.1518  | -0.4378 | -1.2504 |
| 65  | H | 5.3511  | -1.1636 | -2.0476 |
| 66  | H | 4.1297  | -0.0717 | -1.3982 |
| 67  | H | 5.8363  | 0.4057  | -1.3693 |
| 68  | C | 6.7192  | -0.1723 | 3.5597  |
| 69  | H | 7.5934  | -0.7056 | 3.9545  |
| 70  | H | 7.0464  | 0.8228  | 3.2402  |
| 71  | H | 6.0174  | -0.0467 | 4.3943  |
| 72  | C | 2.9200  | 2.4049  | 1.3427  |
| 73  | H | 2.0180  | 2.9644  | 1.6185  |
| 74  | H | 2.7590  | 1.3648  | 1.6523  |
| 75  | H | 3.7616  | 2.8069  | 1.9151  |
| 76  | C | 1.4708  | 1.4342  | -3.4005 |
| 77  | H | 0.5305  | 1.9983  | -3.3616 |
| 78  | H | 1.8400  | 1.4534  | -4.4305 |
| 79  | H | 1.2304  | 0.3970  | -3.1355 |
| 80  | C | 6.0428  | 3.4243  | -2.5062 |
| 81  | H | 5.9826  | 3.7911  | -3.5367 |
| 82  | H | 6.4476  | 4.2268  | -1.8794 |
| 83  | H | 6.7739  | 2.6038  | -2.4947 |
| 84  | C | -1.5755 | -1.1830 | -2.2314 |
| 85  | H | -1.6393 | -0.1108 | -2.4492 |
| 86  | H | -0.5314 | -1.4811 | -2.3802 |
| 87  | H | -2.1916 | -1.7225 | -2.9549 |
| 88  | C | -1.7069 | 0.0263  | 2.6983  |
| 89  | H | -2.3687 | 0.9030  | 2.7049  |
| 90  | H | -1.8151 | -0.4755 | 3.6650  |
| 91  | H | -0.6792 | 0.3905  | 2.6189  |
| 92  | C | -4.0526 | -4.1339 | 1.0379  |
| 93  | H | -4.6399 | -4.0321 | 1.9570  |
| 94  | H | -4.7409 | -4.3566 | 0.2143  |
| 95  | H | -3.4018 | -5.0103 | 1.1622  |
| 96  | C | 2.2772  | -2.1072 | 4.3017  |
| 97  | C | 2.0877  | -3.3871 | 4.8311  |
| 98  | C | 2.9857  | -1.1492 | 5.0346  |
| 99  | C | 2.6021  | -3.7067 | 6.0941  |
| 100 | H | 1.5500  | -4.1410 | 4.2592  |
| 101 | C | 3.4968  | -1.4690 | 6.2982  |
| 102 | H | 3.1523  | -0.1580 | 4.6175  |
| 103 | C | 3.3084  | -2.7494 | 6.8288  |
| 104 | H | 2.4522  | -4.7044 | 6.5021  |
| 105 | H | 4.0454  | -0.7193 | 6.8652  |
| 106 | H | 3.7099  | -2.9997 | 7.8076  |

107

I

1.6861

-1.6389

2.1452



large\_basis\_TS-B-5-6-Br\_NiMes2\_ossts\_PhBr\_t\_oss\_bb  
Energy (POTENTIAL) = -2263.28344836 Eh

|    | Atom | X       | Y       | Z       |
|----|------|---------|---------|---------|
| 1  | C    | -3.7678 | 3.3353  | 0.0322  |
| 2  | C    | -2.6772 | 4.0902  | -0.2432 |
| 3  | C    | -2.0410 | 1.8920  | -0.4108 |
| 4  | N    | -3.3676 | 2.0046  | -0.0721 |
| 5  | N    | -1.6385 | 3.1997  | -0.5096 |
| 6  | Ni   | -0.9671 | 0.3535  | -0.6419 |
| 7  | C    | 0.1454  | -1.1177 | -1.1102 |
| 8  | N    | 1.4134  | -1.4427 | -0.6902 |
| 9  | N    | -0.1521 | -2.1248 | -1.9918 |
| 10 | C    | 1.8776  | -2.6089 | -1.2935 |
| 11 | C    | 0.8901  | -3.0416 | -2.1145 |
| 12 | H    | 2.8561  | -3.0107 | -1.0814 |
| 13 | H    | 0.8247  | -3.8992 | -2.7661 |
| 14 | H    | -4.7796 | 3.6092  | 0.2872  |
| 15 | H    | -2.5360 | 5.1595  | -0.2785 |
| 16 | C    | -1.3961 | -2.2439 | -2.6994 |
| 17 | C    | -2.5008 | -2.8071 | -2.0443 |
| 18 | C    | -1.4542 | -1.8244 | -4.0393 |
| 19 | C    | -3.6764 | -2.9832 | -2.7830 |
| 20 | C    | -2.6548 | -2.0063 | -4.7310 |
| 21 | C    | -3.7727 | -2.5922 | -4.1219 |
| 22 | H    | -4.5394 | -3.4256 | -2.2922 |
| 23 | H    | -2.7208 | -1.6817 | -5.7676 |
| 24 | C    | 2.1735  | -0.6790 | 0.2602  |
| 25 | C    | 2.6897  | 0.5643  | -0.1272 |
| 26 | C    | 2.3678  | -1.1978 | 1.5521  |
| 27 | C    | 3.3775  | 1.3170  | 0.8334  |
| 28 | C    | 3.0663  | -0.4144 | 2.4731  |
| 29 | C    | 3.5633  | 0.8516  | 2.1379  |
| 30 | H    | 3.7694  | 2.2908  | 0.5514  |
| 31 | H    | 3.1996  | -0.7881 | 3.4859  |
| 32 | C    | -4.2592 | 0.8963  | 0.1213  |
| 33 | C    | -4.6837 | 0.1627  | -0.9998 |
| 34 | C    | -4.7149 | 0.6056  | 1.4169  |
| 35 | C    | -5.5752 | -0.8933 | -0.7911 |
| 36 | C    | -5.6022 | -0.4661 | 1.5747  |
| 37 | C    | -6.0376 | -1.2297 | 0.4869  |
| 38 | H    | -5.9176 | -1.4655 | -1.6496 |
| 39 | H    | -5.9571 | -0.7089 | 2.5741  |
| 40 | C    | -0.3223 | 3.6290  | -0.8936 |
| 41 | C    | 0.6330  | 3.8851  | 0.1037  |
| 42 | C    | -0.0507 | 3.8241  | -2.2555 |
| 43 | C    | 1.8755  | 4.3842  | -0.2971 |
| 44 | C    | 1.2102  | 4.3190  | -2.6095 |
| 45 | C    | 2.1790  | 4.6155  | -1.6453 |
| 46 | H    | 2.6277  | 4.5893  | 0.4615  |
| 47 | H    | 1.4384  | 4.4725  | -3.6619 |
| 48 | C    | -0.2596 | -1.1742 | -4.6919 |
| 49 | H    | 0.0825  | -0.3132 | -4.1044 |
| 50 | H    | 0.5894  | -1.8646 | -4.7668 |
| 51 | H    | -0.5042 | -0.8279 | -5.7008 |

|     |    |         |         |         |
|-----|----|---------|---------|---------|
| 52  | C  | -2.4354 | -3.1572 | -0.5806 |
| 53  | H  | -1.5886 | -3.8175 | -0.3564 |
| 54  | H  | -2.2946 | -2.2456 | 0.0149  |
| 55  | H  | -3.3547 | -3.6511 | -0.2518 |
| 56  | C  | -5.0675 | -2.7446 | -4.8838 |
| 57  | H  | -4.9011 | -3.1690 | -5.8812 |
| 58  | H  | -5.7733 | -3.3913 | -4.3519 |
| 59  | H  | -5.5545 | -1.7705 | -5.0273 |
| 60  | C  | 1.8222  | -2.5474 | 1.9455  |
| 61  | H  | 2.4024  | -3.3652 | 1.4982  |
| 62  | H  | 1.8450  | -2.6726 | 3.0314  |
| 63  | H  | 0.7859  | -2.6594 | 1.6134  |
| 64  | C  | 2.4894  | 1.0945  | -1.5236 |
| 65  | H  | 2.6703  | 0.3203  | -2.2785 |
| 66  | H  | 1.4572  | 1.4394  | -1.6558 |
| 67  | H  | 3.1586  | 1.9350  | -1.7226 |
| 68  | C  | 4.2754  | 1.6868  | 3.1754  |
| 69  | H  | 5.1767  | 1.1823  | 3.5472  |
| 70  | H  | 4.5775  | 2.6596  | 2.7728  |
| 71  | H  | 3.6290  | 1.8666  | 4.0440  |
| 72  | C  | 0.3286  | 3.5951  | 1.5509  |
| 73  | H  | -0.5414 | 4.1634  | 1.9029  |
| 74  | H  | 0.0916  | 2.5332  | 1.6855  |
| 75  | H  | 1.1821  | 3.8435  | 2.1892  |
| 76  | C  | -1.0777 | 3.4658  | -3.2998 |
| 77  | H  | -2.0242 | 3.9960  | -3.1395 |
| 78  | H  | -0.7177 | 3.7039  | -4.3054 |
| 79  | H  | -1.3034 | 2.3925  | -3.2576 |
| 80  | C  | 3.5353  | 5.1510  | -2.0384 |
| 81  | H  | 3.6553  | 5.1862  | -3.1261 |
| 82  | H  | 3.6903  | 6.1662  | -1.6505 |
| 83  | H  | 4.3418  | 4.5286  | -1.6308 |
| 84  | C  | -4.1852 | 0.4883  | -2.3843 |
| 85  | H  | -4.1807 | 1.5684  | -2.5698 |
| 86  | H  | -3.1540 | 0.1356  | -2.5066 |
| 87  | H  | -4.8039 | 0.0062  | -3.1458 |
| 88  | C  | -4.2759 | 1.4256  | 2.6045  |
| 89  | H  | -4.7874 | 2.3966  | 2.6343  |
| 90  | H  | -4.5007 | 0.9035  | 3.5399  |
| 91  | H  | -3.1995 | 1.6164  | 2.5712  |
| 92  | C  | -6.9734 | -2.4004 | 0.6752  |
| 93  | H  | -7.4444 | -2.3870 | 1.6637  |
| 94  | H  | -7.7675 | -2.4026 | -0.0812 |
| 95  | H  | -6.4358 | -3.3535 | 0.5786  |
| 96  | Br | -0.9439 | -0.1569 | 1.9382  |
| 97  | C  | -0.3732 | -0.4884 | 4.0078  |
| 98  | C  | -0.5254 | -1.7396 | 4.6027  |
| 99  | C  | 0.3212  | 0.5292  | 4.6613  |
| 100 | C  | 0.0208  | -1.9736 | 5.8721  |
| 101 | H  | -1.0536 | -2.5358 | 4.0812  |
| 102 | C  | 0.8643  | 0.2950  | 5.9306  |
| 103 | H  | 0.4521  | 1.4959  | 4.1784  |
| 104 | C  | 0.7172  | -0.9580 | 6.5359  |
| 105 | H  | -0.0957 | -2.9490 | 6.3410  |
| 106 | H  | 1.4055  | 1.0880  | 6.4438  |

107

H

1.1439

-1.1424

7.5188

large\_basis\_B-3-I\_tetNiIPhIMes2\_bb  
Energy (POTENTIAL) = -2261.54374849 Eh

|    | Atom | X       | Y       | Z       |
|----|------|---------|---------|---------|
| 1  | C    | 1.1878  | 0.1037  | 0.3014  |
| 2  | C    | 1.3745  | 1.1515  | -0.5284 |
| 3  | C    | 2.8594  | -0.4877 | -1.1517 |
| 4  | N    | 2.0835  | -0.8900 | -0.0990 |
| 5  | N    | 2.3831  | 0.7807  | -1.4091 |
| 6  | Ni   | 4.5715  | -1.0526 | -2.1463 |
| 7  | C    | 4.5961  | -2.8876 | -2.7077 |
| 8  | N    | 5.4491  | -3.8112 | -2.1416 |
| 9  | N    | 4.2201  | -3.4735 | -3.8917 |
| 10 | C    | 5.6231  | -4.9117 | -2.9820 |
| 11 | C    | 4.8535  | -4.7025 | -4.0729 |
| 12 | H    | 6.2559  | -5.7389 | -2.7005 |
| 13 | H    | 4.6725  | -5.3049 | -4.9494 |
| 14 | H    | 0.5071  | -0.0487 | 1.1239  |
| 15 | H    | 0.8986  | 2.1178  | -0.5845 |
| 16 | C    | 3.0991  | -3.1032 | -4.7280 |
| 17 | C    | 1.8321  | -3.5806 | -4.3316 |
| 18 | C    | 3.2766  | -2.4217 | -5.9413 |
| 19 | C    | 0.7266  | -3.2756 | -5.1280 |
| 20 | C    | 2.1359  | -2.1538 | -6.7122 |
| 21 | C    | 0.8571  | -2.5523 | -6.3198 |
| 22 | H    | -0.2552 | -3.6285 | -4.8199 |
| 23 | H    | 2.2617  | -1.6195 | -7.6513 |
| 24 | C    | 5.8915  | -3.8842 | -0.7598 |
| 25 | C    | 7.1105  | -3.3219 | -0.3423 |
| 26 | C    | 5.1163  | -4.6749 | 0.1113  |
| 27 | C    | 7.4781  | -3.4770 | 1.0002  |
| 28 | C    | 5.5457  | -4.8242 | 1.4334  |
| 29 | C    | 6.7074  | -4.2099 | 1.9065  |
| 30 | H    | 8.4097  | -3.0280 | 1.3363  |
| 31 | H    | 4.9502  | -5.4335 | 2.1078  |
| 32 | C    | 1.9444  | -2.1992 | 0.4872  |
| 33 | C    | 0.8399  | -2.9687 | 0.0741  |
| 34 | C    | 2.7586  | -2.5820 | 1.5623  |
| 35 | C    | 0.5841  | -4.1655 | 0.7495  |
| 36 | C    | 2.4421  | -3.7741 | 2.2244  |
| 37 | C    | 1.3686  | -4.5792 | 1.8327  |
| 38 | H    | -0.2584 | -4.7770 | 0.4338  |
| 39 | H    | 3.0560  | -4.0779 | 3.0682  |
| 40 | C    | 2.7677  | 1.6292  | -2.5055 |
| 41 | C    | 3.4258  | 2.8453  | -2.2662 |
| 42 | C    | 2.3787  | 1.2408  | -3.8023 |
| 43 | C    | 3.8009  | 3.6107  | -3.3809 |
| 44 | C    | 2.7736  | 2.0373  | -4.8771 |
| 45 | C    | 3.5090  | 3.2153  | -4.6880 |
| 46 | H    | 4.3366  | 4.5424  | -3.2132 |
| 47 | H    | 2.4961  | 1.7357  | -5.8849 |
| 48 | C    | 4.6241  | -1.9788 | -6.4454 |
| 49 | H    | 4.8969  | -1.0022 | -6.0335 |
| 50 | H    | 5.4152  | -2.6748 | -6.1612 |
| 51 | H    | 4.6112  | -1.8934 | -7.5371 |

|     |   |         |         |         |
|-----|---|---------|---------|---------|
| 52  | C | 1.6750  | -4.4367 | -3.1025 |
| 53  | H | 0.6265  | -4.7002 | -2.9420 |
| 54  | H | 2.2488  | -5.3669 | -3.1940 |
| 55  | H | 2.0385  | -3.9272 | -2.2091 |
| 56  | C | -0.3572 | -2.1998 | -7.1434 |
| 57  | H | -0.0920 | -1.9908 | -8.1852 |
| 58  | H | -1.0989 | -3.0066 | -7.1320 |
| 59  | H | -0.8500 | -1.3028 | -6.7439 |
| 60  | C | 3.8539  | -5.3600 | -0.3443 |
| 61  | H | 4.0037  | -5.9301 | -1.2667 |
| 62  | H | 3.4923  | -6.0477 | 0.4241  |
| 63  | H | 3.0629  | -4.6316 | -0.5350 |
| 64  | C | 8.0470  | -2.6201 | -1.2851 |
| 65  | H | 8.9681  | -2.3347 | -0.7682 |
| 66  | H | 8.3173  | -3.2678 | -2.1271 |
| 67  | H | 7.5955  | -1.7158 | -1.6942 |
| 68  | C | 7.1095  | -4.3228 | 3.3564  |
| 69  | H | 8.1983  | -4.3002 | 3.4766  |
| 70  | H | 6.7020  | -3.4839 | 3.9368  |
| 71  | H | 6.7321  | -5.2467 | 3.8087  |
| 72  | C | 3.6793  | 3.3916  | -0.8818 |
| 73  | H | 3.6633  | 2.6204  | -0.1117 |
| 74  | H | 4.6512  | 3.8924  | -0.8351 |
| 75  | H | 2.9134  | 4.1381  | -0.6287 |
| 76  | C | 1.5304  | 0.0165  | -4.0188 |
| 77  | H | 0.6704  | 0.0043  | -3.3385 |
| 78  | H | 1.1589  | -0.0191 | -5.0447 |
| 79  | H | 2.0991  | -0.8969 | -3.8349 |
| 80  | C | 3.9717  | 4.0256  | -5.8740 |
| 81  | H | 3.1615  | 4.1755  | -6.5979 |
| 82  | H | 4.3452  | 5.0090  | -5.5702 |
| 83  | H | 4.7835  | 3.5098  | -6.4039 |
| 84  | C | -0.0769 | -2.4957 | -1.0290 |
| 85  | H | 0.4806  | -2.1228 | -1.8937 |
| 86  | H | -0.7294 | -3.3068 | -1.3644 |
| 87  | H | -0.7177 | -1.6744 | -0.6841 |
| 88  | C | 3.9360  | -1.7491 | 1.9905  |
| 89  | H | 3.6943  | -0.6818 | 2.0105  |
| 90  | H | 4.2848  | -2.0469 | 2.9839  |
| 91  | H | 4.7683  | -1.8706 | 1.2896  |
| 92  | C | 1.0921  | -5.8891 | 2.5289  |
| 93  | H | 1.4333  | -5.8716 | 3.5697  |
| 94  | H | 0.0240  | -6.1330 | 2.5211  |
| 95  | H | 1.6173  | -6.7136 | 2.0267  |
| 96  | C | 5.9313  | -0.7838 | -3.4913 |
| 97  | C | 5.8600  | 0.5414  | -3.9675 |
| 98  | C | 6.8702  | -1.6196 | -4.1161 |
| 99  | C | 6.6721  | 1.0021  | -5.0096 |
| 100 | H | 5.1742  | 1.2438  | -3.5098 |
| 101 | C | 7.7084  | -1.1634 | -5.1399 |
| 102 | H | 6.9585  | -2.6582 | -3.8217 |
| 103 | C | 7.6112  | 0.1508  | -5.5997 |
| 104 | H | 6.5804  | 2.0346  | -5.3416 |
| 105 | H | 8.4269  | -1.8467 | -5.5894 |
| 106 | H | 8.2551  | 0.5072  | -6.4004 |

107

I

6.0240

0.5453

-0.3672

large\_basis\_A-5-Cl\_NiITMe2\_ClPh\_bb  
Energy (POTENTIAL) = -1628.49916775 Eh

|    | Atom | X       | Y       | Z       |
|----|------|---------|---------|---------|
| 1  | C    | -0.5890 | 0.3177  | -0.2354 |
| 2  | C    | -0.1472 | 0.1934  | -1.5209 |
| 3  | C    | -0.4380 | 2.4400  | -1.1137 |
| 4  | N    | -0.7630 | 1.6838  | -0.0130 |
| 5  | N    | -0.0631 | 1.4890  | -2.0320 |
| 6  | C    | -1.2133 | 2.2464  | 1.2496  |
| 7  | H    | -1.3226 | 3.3242  | 1.1125  |
| 8  | H    | -2.1778 | 1.8161  | 1.5400  |
| 9  | H    | -0.4841 | 2.0556  | 2.0444  |
| 10 | C    | 0.3753  | 1.7996  | -3.3825 |
| 11 | H    | -0.3044 | 1.3629  | -4.1228 |
| 12 | H    | 0.3751  | 2.8868  | -3.4879 |
| 13 | H    | 1.3862  | 1.4163  | -3.5590 |
| 14 | C    | 0.2142  | -1.0104 | -2.3244 |
| 15 | H    | -0.3908 | -1.0864 | -3.2373 |
| 16 | H    | 1.2674  | -0.9909 | -2.6342 |
| 17 | H    | 0.0545  | -1.9218 | -1.7412 |
| 18 | C    | -0.8656 | -0.7070 | 0.8127  |
| 19 | H    | -0.6399 | -1.7091 | 0.4372  |
| 20 | H    | -0.2575 | -0.5410 | 1.7117  |
| 21 | H    | -1.9176 | -0.6957 | 1.1270  |
| 22 | C    | -0.4146 | 6.1745  | -1.4184 |
| 23 | N    | 0.6712  | 7.0015  | -1.5813 |
| 24 | N    | -1.4600 | 7.0628  | -1.3368 |
| 25 | C    | 0.3151  | 8.3504  | -1.5959 |
| 26 | C    | 2.0387  | 6.5250  | -1.7092 |
| 27 | C    | -1.0406 | 8.3894  | -1.4413 |
| 28 | C    | -2.8462 | 6.6638  | -1.1593 |
| 29 | C    | 1.3176  | 9.4437  | -1.7560 |
| 30 | H    | 2.0128  | 5.4335  | -1.6915 |
| 31 | H    | 2.4787  | 6.8652  | -2.6531 |
| 32 | H    | 2.6554  | 6.8851  | -0.8788 |
| 33 | C    | -1.9890 | 9.5387  | -1.3727 |
| 34 | H    | -3.4599 | 7.0088  | -1.9987 |
| 35 | H    | -2.8725 | 5.5727  | -1.1156 |
| 36 | H    | -3.2529 | 7.0748  | -0.2285 |
| 37 | H    | 0.8275  | 10.4206 | -1.7139 |
| 38 | H    | 2.0780  | 9.4159  | -0.9646 |
| 39 | H    | 1.8463  | 9.3745  | -2.7159 |
| 40 | H    | -2.7435 | 9.4933  | -2.1690 |
| 41 | H    | -2.5284 | 9.5633  | -0.4168 |
| 42 | H    | -1.4507 | 10.4850 | -1.4770 |
| 43 | Ni   | -0.4405 | 4.3057  | -1.2798 |
| 44 | Cl   | 1.9336  | 4.5003  | 1.6035  |
| 45 | C    | 3.1374  | 4.6094  | 2.8947  |
| 46 | C    | 4.4606  | 4.2600  | 2.6220  |
| 47 | C    | 2.7441  | 5.0450  | 4.1606  |
| 48 | C    | 5.4077  | 4.3516  | 3.6450  |
| 49 | H    | 4.7441  | 3.9240  | 1.6297  |
| 50 | C    | 3.7033  | 5.1311  | 5.1729  |
| 51 | H    | 1.7094  | 5.3121  | 4.3503  |

|    |   |        |        |        |
|----|---|--------|--------|--------|
| 52 | C | 5.0334 | 4.7859 | 4.9193 |
| 53 | H | 6.4400 | 4.0814 | 3.4402 |
| 54 | H | 3.4046 | 5.4693 | 6.1614 |
| 55 | H | 5.7746 | 4.8548 | 5.7106 |



large\_basis\_TS-A-2-3-Cl\_NiITMe2\_OATS\_PhCl\_bb

Energy (POTENTIAL) = -1628.51976840 Eh

|    | Atom | X       | Y       | Z       |
|----|------|---------|---------|---------|
| 1  | C    | -1.3353 | 1.0580  | -0.3955 |
| 2  | C    | -0.0367 | 0.6441  | -0.4385 |
| 3  | C    | -0.0911 | 2.5957  | 0.7570  |
| 4  | N    | -1.3404 | 2.2465  | 0.3417  |
| 5  | N    | 0.6998  | 1.5964  | 0.2751  |
| 6  | C    | -2.5342 | 3.0301  | 0.6160  |
| 7  | H    | -3.3236 | 2.3902  | 1.0202  |
| 8  | H    | -2.2784 | 3.7887  | 1.3551  |
| 9  | H    | -2.8984 | 3.5172  | -0.2954 |
| 10 | C    | 2.1356  | 1.5122  | 0.4915  |
| 11 | H    | 2.6770  | 1.6036  | -0.4559 |
| 12 | H    | 2.4282  | 2.3228  | 1.1581  |
| 13 | H    | 2.3943  | 0.5567  | 0.9584  |
| 14 | C    | 0.5991  | -0.5477 | -1.0705 |
| 15 | H    | 1.3772  | -0.2581 | -1.7887 |
| 16 | H    | 1.0704  | -1.2014 | -0.3252 |
| 17 | H    | -0.1482 | -1.1388 | -1.6069 |
| 18 | C    | -2.5808 | 0.4606  | -0.9582 |
| 19 | H    | -2.3473 | -0.4440 | -1.5266 |
| 20 | H    | -3.2907 | 0.1849  | -0.1676 |
| 21 | H    | -3.0969 | 1.1570  | -1.6315 |
| 22 | C    | 0.3285  | 5.5046  | 0.2393  |
| 23 | N    | 1.1863  | 5.6435  | -0.8096 |
| 24 | N    | -0.6614 | 6.3994  | -0.0371 |
| 25 | C    | 0.7404  | 6.5943  | -1.7323 |
| 26 | C    | 2.4049  | 4.8635  | -0.9592 |
| 27 | C    | -0.4366 | 7.0773  | -1.2393 |
| 28 | C    | -1.8084 | 6.6372  | 0.8249  |
| 29 | C    | 1.4999  | 6.9299  | -2.9711 |
| 30 | H    | 2.2896  | 4.1045  | -1.7409 |
| 31 | H    | 3.2440  | 5.5166  | -1.2155 |
| 32 | C    | -1.3757 | 8.1107  | -1.7626 |
| 33 | H    | -2.7372 | 6.3372  | 0.3290  |
| 34 | H    | -1.6781 | 6.0490  | 1.7338  |
| 35 | H    | -1.8720 | 7.6972  | 1.0896  |
| 36 | H    | 0.9585  | 7.6778  | -3.5572 |
| 37 | H    | 2.4921  | 7.3393  | -2.7409 |
| 38 | H    | 1.6506  | 6.0475  | -3.6061 |
| 39 | H    | -2.3850 | 7.7044  | -1.9073 |
| 40 | H    | -1.4638 | 8.9640  | -1.0776 |
| 41 | H    | -1.0256 | 8.4902  | -2.7266 |
| 42 | Ni   | 0.4188  | 4.1981  | 1.7052  |
| 43 | C    | 0.8453  | 3.7221  | 3.4513  |
| 44 | C    | 0.7526  | 5.1698  | 3.5215  |
| 45 | C    | 2.1166  | 3.1194  | 3.7481  |
| 46 | C    | 1.9029  | 5.9271  | 3.9147  |
| 47 | H    | -0.2215 | 5.6422  | 3.6424  |
| 48 | C    | 3.2167  | 3.8968  | 4.0303  |
| 49 | H    | 2.1986  | 2.0362  | 3.7162  |
| 50 | C    | 3.1169  | 5.3166  | 4.1323  |
| 51 | H    | 1.7934  | 6.9997  | 4.0706  |

|    |    |         |        |         |
|----|----|---------|--------|---------|
| 52 | H  | 4.1820  | 3.4175 | 4.1852  |
| 53 | H  | 3.9912  | 5.8997 | 4.4109  |
| 54 | Cl | -0.6493 | 2.7046 | 4.5511  |
| 55 | H  | 2.6109  | 4.3740 | -0.0073 |

large\_basis\_TS-B-2-3-Cl\_NiIMes2\_oa\_PhCl\_bb

Energy (POTENTIAL) = -2710.31636386 Eh

|    | Atom | X       | Y       | Z       |
|----|------|---------|---------|---------|
| 1  | C    | 1.6911  | 2.2370  | 0.0220  |
| 2  | C    | 2.6748  | 2.4934  | -0.8609 |
| 3  | C    | 2.3788  | 0.2009  | -0.8254 |
| 4  | N    | 1.5034  | 0.8543  | 0.0288  |
| 5  | N    | 3.0856  | 1.2600  | -1.3662 |
| 6  | Ni   | 2.6609  | -1.6796 | -1.3298 |
| 7  | C    | 4.3230  | -2.9112 | -1.2134 |
| 8  | N    | 5.0517  | -3.2248 | -0.0862 |
| 9  | N    | 4.7740  | -3.8609 | -2.1129 |
| 10 | C    | 5.8951  | -4.3171 | -0.2783 |
| 11 | C    | 5.7213  | -4.7156 | -1.5567 |
| 12 | H    | 6.5376  | -4.6849 | 0.5067  |
| 13 | H    | 6.1752  | -5.5101 | -2.1283 |
| 14 | H    | 1.0983  | 2.8907  | 0.6419  |
| 15 | H    | 3.1221  | 3.4191  | -1.1863 |
| 16 | C    | 4.4874  | -3.9283 | -3.5193 |
| 17 | C    | 3.7942  | -5.0323 | -4.0365 |
| 18 | C    | 5.0246  | -2.9326 | -4.3536 |
| 19 | C    | 3.5764  | -5.0786 | -5.4205 |
| 20 | C    | 4.7675  | -3.0132 | -5.7240 |
| 21 | C    | 4.0339  | -4.0722 | -6.2755 |
| 22 | H    | 3.0245  | -5.9202 | -5.8336 |
| 23 | H    | 5.1679  | -2.2420 | -6.3789 |
| 24 | C    | 5.1963  | -2.4297 | 1.1044  |
| 25 | C    | 6.1019  | -1.3556 | 1.0627  |
| 26 | C    | 4.5820  | -2.8377 | 2.2958  |
| 27 | C    | 6.3143  | -0.6285 | 2.2377  |
| 28 | C    | 4.8467  | -2.0958 | 3.4534  |
| 29 | C    | 5.6884  | -0.9788 | 3.4409  |
| 30 | H    | 7.0039  | 0.2126  | 2.2182  |
| 31 | H    | 4.3721  | -2.3950 | 4.3851  |
| 32 | C    | 0.4089  | 0.3173  | 0.7936  |
| 33 | C    | -0.9016 | 0.6849  | 0.4363  |
| 34 | C    | 0.6670  | -0.4566 | 1.9333  |
| 35 | C    | -1.9566 | 0.2144  | 1.2287  |
| 36 | C    | -0.4162 | -0.8948 | 2.6977  |
| 37 | C    | -1.7363 | -0.5802 | 2.3574  |
| 38 | H    | -2.9752 | 0.4780  | 0.9517  |
| 39 | H    | -0.2225 | -1.5030 | 3.5789  |
| 40 | C    | 4.0845  | 1.2296  | -2.3993 |
| 41 | C    | 5.3915  | 1.6350  | -2.0779 |
| 42 | C    | 3.6945  | 0.9784  | -3.7279 |
| 43 | C    | 6.3252  | 1.7361  | -3.1170 |
| 44 | C    | 4.6589  | 1.1095  | -4.7307 |
| 45 | C    | 5.9780  | 1.4821  | -4.4471 |
| 46 | H    | 7.3434  | 2.0357  | -2.8777 |
| 47 | H    | 4.3704  | 0.9135  | -5.7612 |
| 48 | C    | 5.9053  | -1.8502 | -3.7870 |
| 49 | H    | 5.3350  | -1.1556 | -3.1669 |
| 50 | H    | 6.6906  | -2.2800 | -3.1535 |
| 51 | H    | 6.3839  | -1.2822 | -4.5871 |

|     |   |         |         |         |
|-----|---|---------|---------|---------|
| 52  | C | 3.3015  | -6.1582 | -3.1578 |
| 53  | H | 4.0527  | -6.9558 | -3.0840 |
| 54  | H | 3.0835  | -5.8277 | -2.1381 |
| 55  | H | 2.3921  | -6.6035 | -3.5739 |
| 56  | C | 3.7346  | -4.1108 | -7.7549 |
| 57  | H | 3.4541  | -5.1171 | -8.0839 |
| 58  | H | 2.9009  | -3.4392 | -8.0011 |
| 59  | H | 4.5968  | -3.7842 | -8.3481 |
| 60  | C | 3.6513  | -4.0221 | 2.3277  |
| 61  | H | 4.1264  | -4.9220 | 1.9195  |
| 62  | H | 3.3327  | -4.2404 | 3.3517  |
| 63  | H | 2.7571  | -3.8313 | 1.7230  |
| 64  | C | 6.8703  | -1.0486 | -0.1976 |
| 65  | H | 7.4355  | -1.9274 | -0.5319 |
| 66  | H | 6.2037  | -0.7675 | -1.0169 |
| 67  | H | 7.5799  | -0.2339 | -0.0342 |
| 68  | C | 5.9052  | -0.1601 | 4.6906  |
| 69  | H | 5.7964  | -0.7686 | 5.5952  |
| 70  | H | 6.8999  | 0.2995  | 4.7039  |
| 71  | H | 5.1700  | 0.6537  | 4.7561  |
| 72  | C | 5.7781  | 2.0133  | -0.6677 |
| 73  | H | 5.4446  | 3.0309  | -0.4277 |
| 74  | H | 5.3316  | 1.3456  | 0.0746  |
| 75  | H | 6.8646  | 1.9906  | -0.5457 |
| 76  | C | 2.2806  | 0.5896  | -4.0654 |
| 77  | H | 1.5562  | 1.2873  | -3.6286 |
| 78  | H | 2.1293  | 0.5670  | -5.1488 |
| 79  | H | 2.0486  | -0.4004 | -3.6653 |
| 80  | C | 7.0071  | 1.5612  | -5.5481 |
| 81  | H | 7.8200  | 2.2504  | -5.2946 |
| 82  | H | 7.4599  | 0.5763  | -5.7296 |
| 83  | H | 6.5598  | 1.8897  | -6.4931 |
| 84  | C | -1.2006 | 1.5649  | -0.7573 |
| 85  | H | -0.4964 | 1.3977  | -1.5772 |
| 86  | H | -2.2111 | 1.3694  | -1.1310 |
| 87  | H | -1.1492 | 2.6291  | -0.4938 |
| 88  | C | 2.0753  | -0.8037 | 2.3133  |
| 89  | H | 2.6928  | 0.0930  | 2.4484  |
| 90  | H | 2.1019  | -1.3830 | 3.2395  |
| 91  | H | 2.5440  | -1.3934 | 1.5228  |
| 92  | C | -2.8887 | -1.1092 | 3.1770  |
| 93  | H | -3.8010 | -0.5245 | 3.0168  |
| 94  | H | -3.1136 | -2.1504 | 2.9089  |
| 95  | H | -2.6578 | -1.0960 | 4.2487  |
| 96  | C | 0.8962  | -2.2317 | -1.7591 |
| 97  | C | -0.2516 | -1.4560 | -2.0932 |
| 98  | C | 1.4477  | -3.0877 | -2.7554 |
| 99  | C | -0.6543 | -1.3528 | -3.4109 |
| 100 | H | -0.7800 | -0.9388 | -1.3065 |
| 101 | C | 1.0212  | -2.9542 | -4.0952 |
| 102 | H | 2.0525  | -3.9315 | -2.4654 |
| 103 | C | -0.0006 | -2.0793 | -4.4348 |
| 104 | H | -1.4914 | -0.7026 | -3.6588 |
| 105 | H | 1.4741  | -3.5894 | -4.8509 |
| 106 | H | -0.3358 | -1.9938 | -5.4652 |

107

C1

0.6593

-3.2562

0.0263

large\_basis\_NiCODIMes\_B-1x\_NiCODIMes\_bb  
Energy (POTENTIAL) = -1406.00801396 Eh

|    | Atom | X       | Y       | Z       |
|----|------|---------|---------|---------|
| 1  | Ni   | -0.0509 | 0.1322  | 0.1509  |
| 2  | C    | -1.9561 | 1.1564  | 0.1102  |
| 3  | H    | -2.5430 | 0.7136  | 0.9182  |
| 4  | C    | -0.9400 | 2.0193  | 0.4857  |
| 5  | H    | -0.8295 | 2.2227  | 1.5495  |
| 6  | C    | -0.1933 | 0.2241  | -1.9419 |
| 7  | H    | -0.0872 | -0.8017 | -2.3054 |
| 8  | C    | 0.9651  | 0.8438  | -1.4618 |
| 9  | H    | 1.9216  | 0.3334  | -1.5696 |
| 10 | C    | -0.1795 | 2.9550  | -0.4460 |
| 11 | C    | -2.5318 | 0.9549  | -1.2779 |
| 12 | C    | -1.4574 | 0.9444  | -2.3893 |
| 13 | C    | 1.0757  | 2.3226  | -1.1315 |
| 14 | H    | 0.1589  | 3.8256  | 0.1285  |
| 15 | H    | -0.8610 | 3.3432  | -1.2100 |
| 16 | H    | 1.9337  | 2.4401  | -0.4621 |
| 17 | H    | 1.3087  | 2.9131  | -2.0336 |
| 18 | H    | -1.2227 | 1.9681  | -2.6990 |
| 19 | H    | -1.8720 | 0.4517  | -3.2790 |
| 20 | H    | -3.0421 | -0.0174 | -1.2788 |
| 21 | H    | -3.3091 | 1.7053  | -1.5044 |
| 22 | C    | 0.9707  | -0.5587 | 1.5843  |
| 23 | N    | 0.5747  | -1.6645 | 2.3067  |
| 24 | N    | 2.1835  | -0.2481 | 2.1541  |
| 25 | C    | 1.5082  | -2.0224 | 3.2792  |
| 26 | C    | -0.6833 | -2.3089 | 2.0681  |
| 27 | C    | 2.5226  | -1.1290 | 3.1846  |
| 28 | C    | 3.0111  | 0.8225  | 1.6832  |
| 29 | H    | 1.3599  | -2.8676 | 3.9339  |
| 30 | C    | -1.7859 | -1.9572 | 2.8621  |
| 31 | C    | -0.7915 | -3.2297 | 1.0117  |
| 32 | H    | 3.4443  | -1.0342 | 3.7382  |
| 33 | C    | 3.9235  | 0.5676  | 0.6487  |
| 34 | C    | 2.8707  | 2.0967  | 2.2545  |
| 35 | C    | -3.0156 | -2.5678 | 2.5898  |
| 36 | C    | -1.6489 | -0.9237 | 3.9522  |
| 37 | C    | -2.0400 | -3.8132 | 0.7752  |
| 38 | C    | 0.4021  | -3.5555 | 0.1480  |
| 39 | C    | 4.6976  | 1.6346  | 0.1775  |
| 40 | C    | 4.0509  | -0.8155 | 0.0607  |
| 41 | C    | 3.6657  | 3.1327  | 1.7543  |
| 42 | C    | 1.8778  | 2.3333  | 3.3642  |
| 43 | C    | -3.1615 | -3.4973 | 1.5539  |
| 44 | H    | -3.8794 | -2.3043 | 3.1962  |
| 45 | H    | -0.8951 | -1.2135 | 4.6940  |
| 46 | H    | -1.3291 | 0.0388  | 3.5348  |
| 47 | H    | -2.5996 | -0.7742 | 4.4729  |
| 48 | H    | -2.1401 | -4.5297 | -0.0376 |
| 49 | H    | 1.2612  | -3.8747 | 0.7502  |
| 50 | H    | 0.1652  | -4.3519 | -0.5642 |
| 51 | H    | 0.7191  | -2.6676 | -0.4137 |

|    |   |         |         |         |
|----|---|---------|---------|---------|
| 52 | C | 4.5837  | 2.9210  | 0.7171  |
| 53 | H | 5.4019  | 1.4558  | -0.6320 |
| 54 | H | 4.3926  | -1.5381 | 0.8124  |
| 55 | H | 3.0835  | -1.1756 | -0.3073 |
| 56 | H | 4.7648  | -0.8260 | -0.7686 |
| 57 | H | 3.5627  | 4.1282  | 2.1809  |
| 58 | H | 2.1028  | 1.7159  | 4.2427  |
| 59 | H | 1.8779  | 3.3824  | 3.6754  |
| 60 | H | 0.8647  | 2.0671  | 3.0432  |
| 61 | C | -4.4880 | -4.1704 | 1.2922  |
| 62 | C | 5.4440  | 4.0552  | 0.2119  |
| 63 | H | -4.4820 | -5.2061 | 1.6584  |
| 64 | H | -5.3100 | -3.6478 | 1.7927  |
| 65 | H | -4.7115 | -4.2098 | 0.2197  |
| 66 | H | 6.2928  | 4.2359  | 0.8855  |
| 67 | H | 5.8525  | 3.8389  | -0.7809 |
| 68 | H | 4.8762  | 4.9909  | 0.1513  |

large\_basis\_TS-C-5-6-Cl\_NiIXy2\_ClPh\_spt\_sps

Energy (POTENTIAL) = -2553.00094615 Eh

|    | Atom | X       | Y       | Z       |
|----|------|---------|---------|---------|
| 1  | C    | -0.5015 | 1.0308  | 0.0868  |
| 2  | C    | 0.5295  | 1.8151  | -0.3102 |
| 3  | C    | 1.2511  | -0.3593 | -0.4163 |
| 4  | N    | -0.0487 | -0.2849 | 0.0187  |
| 5  | N    | 1.5844  | 0.9556  | -0.6128 |
| 6  | Ni   | 2.3392  | -1.8911 | -0.6780 |
| 7  | C    | 3.4299  | -3.3497 | -1.2072 |
| 8  | N    | 4.7118  | -3.6584 | -0.8238 |
| 9  | N    | 3.1091  | -4.3745 | -2.0584 |
| 10 | C    | 5.1643  | -4.8344 | -1.4184 |
| 11 | C    | 4.1529  | -5.2883 | -2.1970 |
| 12 | H    | 6.1529  | -5.2247 | -1.2330 |
| 13 | H    | 4.0704  | -6.1594 | -2.8284 |
| 14 | H    | -1.5037 | 1.2748  | 0.4036  |
| 15 | H    | 0.6182  | 2.8862  | -0.4072 |
| 16 | C    | 1.8423  | -4.5260 | -2.7194 |
| 17 | C    | 0.7851  | -5.1316 | -2.0204 |
| 18 | C    | 1.7268  | -4.1054 | -4.0547 |
| 19 | C    | -0.4078 | -5.3596 | -2.7171 |
| 20 | C    | 0.5114  | -4.3392 | -4.7097 |
| 21 | C    | -0.5421 | -4.9751 | -4.0514 |
| 22 | H    | -1.2360 | -5.8382 | -2.2021 |
| 23 | H    | 0.3964  | -4.0235 | -5.7435 |
| 24 | C    | 5.5054  | -2.8641 | 0.0724  |
| 25 | C    | 6.0219  | -1.6417 | -0.3881 |
| 26 | C    | 5.7575  | -3.3529 | 1.3657  |
| 27 | C    | 6.7962  | -0.8844 | 0.5001  |
| 28 | C    | 6.5384  | -2.5643 | 2.2197  |
| 29 | C    | 7.0504  | -1.3380 | 1.7940  |
| 30 | H    | 7.2013  | 0.0664  | 0.1661  |
| 31 | H    | 6.7402  | -2.9181 | 3.2276  |
| 32 | C    | -0.8561 | -1.4246 | 0.3538  |
| 33 | C    | -1.3498 | -2.2289 | -0.6863 |
| 34 | C    | -1.1379 | -1.6788 | 1.7071  |
| 35 | C    | -2.1381 | -3.3334 | -0.3385 |
| 36 | C    | -1.9311 | -2.7924 | 2.0093  |
| 37 | C    | -2.4243 | -3.6164 | 0.9967  |
| 38 | H    | -2.5273 | -3.9712 | -1.1269 |
| 39 | H    | -2.1568 | -3.0128 | 3.0496  |
| 40 | C    | 2.8774  | 1.4154  | -1.0389 |
| 41 | C    | 3.8891  | 1.5598  | -0.0753 |
| 42 | C    | 3.0645  | 1.7442  | -2.3915 |
| 43 | C    | 5.1148  | 2.0905  | -0.4951 |
| 44 | C    | 4.3096  | 2.2603  | -2.7714 |
| 45 | C    | 5.3221  | 2.4448  | -1.8287 |
| 46 | H    | 5.9107  | 2.2198  | 0.2330  |
| 47 | H    | 4.4802  | 2.5214  | -3.8127 |
| 48 | C    | 2.8695  | -3.4014 | -4.7431 |
| 49 | H    | 3.1257  | -2.4727 | -4.2177 |
| 50 | H    | 3.7773  | -4.0162 | -4.7601 |
| 51 | H    | 2.6095  | -3.1497 | -5.7759 |



|    |    |         |         |         |
|----|----|---------|---------|---------|
| 52 | C  | 0.9252  | -5.4743 | -0.5605 |
| 53 | H  | 1.8038  | -6.1035 | -0.3723 |
| 54 | H  | 1.0574  | -4.5585 | 0.0283  |
| 55 | H  | 0.0387  | -5.9990 | -0.1922 |
| 56 | C  | 5.1981  | -4.6754 | 1.8272  |
| 57 | H  | 5.7154  | -5.5202 | 1.3546  |
| 58 | H  | 5.3034  | -4.7835 | 2.9106  |
| 59 | H  | 4.1358  | -4.7564 | 1.5789  |
| 60 | C  | 5.7348  | -1.1478 | -1.7823 |
| 61 | H  | 5.8738  | -1.9397 | -2.5275 |
| 62 | H  | 4.6929  | -0.8132 | -1.8587 |
| 63 | H  | 6.3839  | -0.3077 | -2.0413 |
| 64 | C  | 3.6608  | 1.1223  | 1.3480  |
| 65 | H  | 2.7897  | 1.6233  | 1.7888  |
| 66 | H  | 3.4616  | 0.0446  | 1.3860  |
| 67 | H  | 4.5343  | 1.3364  | 1.9706  |
| 68 | C  | 1.9634  | 1.5208  | -3.3981 |
| 69 | H  | 1.0657  | 2.1023  | -3.1556 |
| 70 | H  | 2.2893  | 1.8032  | -4.4038 |
| 71 | H  | 1.6629  | 0.4658  | -3.4173 |
| 72 | C  | -1.0205 | -1.9318 | -2.1264 |
| 73 | H  | -1.1379 | -0.8664 | -2.3561 |
| 74 | H  | 0.0240  | -2.1942 | -2.3376 |
| 75 | H  | -1.6607 | -2.5060 | -2.8006 |
| 76 | C  | -0.5953 | -0.7921 | 2.7995  |
| 77 | H  | -1.0892 | 0.1879  | 2.8075  |
| 78 | H  | -0.7453 | -1.2507 | 3.7812  |
| 79 | H  | 0.4769  | -0.6218 | 2.6646  |
| 80 | C  | 2.2938  | -3.1223 | 3.7109  |
| 81 | C  | 1.1590  | -3.7235 | 4.2404  |
| 82 | C  | 3.4208  | -2.8734 | 4.4839  |
| 83 | C  | 1.1535  | -4.0888 | 5.5938  |
| 84 | H  | 0.2887  | -3.9056 | 3.6123  |
| 85 | C  | 3.4117  | -3.2419 | 5.8363  |
| 86 | H  | 4.2974  | -2.4035 | 4.0419  |
| 87 | C  | 2.2786  | -3.8481 | 6.3905  |
| 88 | H  | 0.2726  | -4.5607 | 6.0256  |
| 89 | H  | 4.2871  | -3.0551 | 6.4559  |
| 90 | H  | 2.2725  | -4.1325 | 7.4398  |
| 91 | Cl | 2.3065  | -2.5685 | 1.7116  |
| 92 | H  | 6.2802  | 2.8551  | -2.1372 |
| 93 | H  | -1.4751 | -5.1611 | -4.5774 |
| 94 | H  | 7.6531  | -0.7376 | 2.4708  |
| 95 | H  | -3.0367 | -4.4784 | 1.2492  |

large\_basis\_B-2-I\_NiIMes2\_eta2\_PhI\_fixCI\_bb

Energy (POTENTIAL) = -2261.48146788 Eh

|    | Atom | X       | Y       | Z       |
|----|------|---------|---------|---------|
| 1  | C    | 0.4072  | 0.5732  | 0.0255  |
| 2  | C    | 1.4047  | 0.8576  | -0.8331 |
| 3  | C    | 1.1193  | -1.4392 | -0.8658 |
| 4  | N    | 0.2285  | -0.8096 | -0.0095 |
| 5  | N    | 1.8313  | -0.3596 | -1.3623 |
| 6  | Ni   | 1.3047  | -3.3336 | -1.4913 |
| 7  | C    | 3.0162  | -4.4950 | -1.3574 |
| 8  | N    | 3.7466  | -4.8011 | -0.2247 |
| 9  | N    | 3.4478  | -5.4771 | -2.2358 |
| 10 | C    | 4.5644  | -5.9173 | -0.3949 |
| 11 | C    | 4.3802  | -6.3382 | -1.6629 |
| 12 | H    | 5.2009  | -6.2814 | 0.3966  |
| 13 | H    | 4.8168  | -7.1537 | -2.2182 |
| 14 | H    | -0.2003 | 1.2065  | 0.6526  |
| 15 | H    | 1.8540  | 1.7937  | -1.1252 |
| 16 | C    | 3.1489  | -5.6003 | -3.6353 |
| 17 | C    | 2.4859  | -6.7464 | -4.1007 |
| 18 | C    | 3.6489  | -4.6258 | -4.5169 |
| 19 | C    | 2.2782  | -6.8698 | -5.4817 |
| 20 | C    | 3.4030  | -4.7846 | -5.8826 |
| 21 | C    | 2.7137  | -5.8967 | -6.3852 |
| 22 | H    | 1.7510  | -7.7459 | -5.8532 |
| 23 | H    | 3.7763  | -4.0319 | -6.5739 |
| 24 | C    | 3.9411  | -3.9883 | 0.9464  |
| 25 | C    | 4.8852  | -2.9501 | 0.8673  |
| 26 | C    | 3.3557  | -4.3662 | 2.1618  |
| 27 | C    | 5.1552  | -2.2174 | 2.0268  |
| 28 | C    | 3.6699  | -3.6155 | 3.3013  |
| 29 | C    | 4.5468  | -2.5273 | 3.2502  |
| 30 | H    | 5.8754  | -1.4036 | 1.9798  |
| 31 | H    | 3.2130  | -3.8885 | 4.2499  |
| 32 | C    | -0.8753 | -1.3666 | 0.7274  |
| 33 | C    | -2.1830 | -1.0326 | 0.3316  |
| 34 | C    | -0.6285 | -2.1012 | 1.8954  |
| 35 | C    | -3.2467 | -1.5053 | 1.1105  |
| 36 | C    | -1.7200 | -2.5353 | 2.6511  |
| 37 | C    | -3.0373 | -2.2596 | 2.2691  |
| 38 | H    | -4.2637 | -1.2700 | 0.8037  |
| 39 | H    | -1.5352 | -3.1153 | 3.5528  |
| 40 | C    | 2.8366  | -0.3501 | -2.3897 |
| 41 | C    | 4.1500  | 0.0080  | -2.0470 |
| 42 | C    | 2.4393  | -0.5038 | -3.7305 |
| 43 | C    | 5.0921  | 0.1198  | -3.0784 |
| 44 | C    | 3.4089  | -0.3610 | -4.7253 |
| 45 | C    | 4.7431  | -0.0646 | -4.4191 |
| 46 | H    | 6.1183  | 0.3760  | -2.8238 |
| 47 | H    | 3.1148  | -0.4852 | -5.7653 |
| 48 | C    | 4.4775  | -3.4769 | -4.0053 |
| 49 | H    | 3.8835  | -2.8016 | -3.3860 |
| 50 | H    | 5.3050  | -3.8398 | -3.3836 |
| 51 | H    | 4.8978  | -2.9024 | -4.8337 |

|     |   |         |         |         |
|-----|---|---------|---------|---------|
| 52  | C | 2.0060  | -7.8363 | -3.1704 |
| 53  | H | 2.7710  | -8.6135 | -3.0419 |
| 54  | H | 1.7635  | -7.4569 | -2.1735 |
| 55  | H | 1.1131  | -8.3219 | -3.5772 |
| 56  | C | 2.4326  | -6.0214 | -7.8634 |
| 57  | H | 3.2972  | -5.7140 | -8.4636 |
| 58  | H | 2.1731  | -7.0490 | -8.1392 |
| 59  | H | 1.5918  | -5.3785 | -8.1569 |
| 60  | C | 2.4330  | -5.5550 | 2.2397  |
| 61  | H | 2.9803  | -6.4929 | 2.0780  |
| 62  | H | 1.9496  | -5.6139 | 3.2197  |
| 63  | H | 1.6532  | -5.5042 | 1.4741  |
| 64  | C | 5.6356  | -2.6986 | -0.4159 |
| 65  | H | 6.1553  | -3.6076 | -0.7436 |
| 66  | H | 4.9617  | -2.4074 | -1.2254 |
| 67  | H | 6.3826  | -1.9114 | -0.2874 |
| 68  | C | 4.8286  | -1.7006 | 4.4817  |
| 69  | H | 4.1354  | -0.8511 | 4.5507  |
| 70  | H | 4.7117  | -2.2896 | 5.3981  |
| 71  | H | 5.8442  | -1.2894 | 4.4658  |
| 72  | C | 4.5304  | 0.3359  | -0.6239 |
| 73  | H | 4.1850  | 1.3410  | -0.3499 |
| 74  | H | 4.0865  | -0.3615 | 0.0911  |
| 75  | H | 5.6164  | 0.3201  | -0.4979 |
| 76  | C | 1.0011  | -0.7748 | -4.0767 |
| 77  | H | 0.3461  | 0.0195  | -3.6953 |
| 78  | H | 0.8628  | -0.8440 | -5.1597 |
| 79  | H | 0.6618  | -1.7090 | -3.6258 |
| 80  | C | 5.7780  | 0.0241  | -5.5140 |
| 81  | H | 6.6738  | 0.5598  | -5.1821 |
| 82  | H | 6.0938  | -0.9786 | -5.8342 |
| 83  | H | 5.3820  | 0.5338  | -6.4002 |
| 84  | C | -2.4625 | -0.1674 | -0.8760 |
| 85  | H | -1.7493 | -0.3495 | -1.6841 |
| 86  | H | -3.4699 | -0.3581 | -1.2600 |
| 87  | H | -2.4051 | 0.8989  | -0.6218 |
| 88  | C | 0.7791  | -2.4264 | 2.2976  |
| 89  | H | 1.3808  | -1.5205 | 2.4425  |
| 90  | H | 0.8031  | -3.0075 | 3.2229  |
| 91  | H | 1.2705  | -3.0046 | 1.5116  |
| 92  | C | -4.1991 | -2.7967 | 3.0694  |
| 93  | H | -5.1092 | -2.2093 | 2.9060  |
| 94  | H | -4.4215 | -3.8337 | 2.7828  |
| 95  | H | -3.9802 | -2.7985 | 4.1434  |
| 96  | C | -0.5191 | -3.9255 | -1.8039 |
| 97  | C | -1.6265 | -3.1328 | -2.2590 |
| 98  | C | 0.2602  | -4.6586 | -2.7713 |
| 99  | C | -1.8130 | -2.9105 | -3.6026 |
| 100 | H | -2.3009 | -2.7070 | -1.5282 |
| 101 | C | 0.0171  | -4.4007 | -4.1586 |
| 102 | H | 0.7043  | -5.6085 | -2.5126 |
| 103 | C | -0.9718 | -3.5352 | -4.5686 |
| 104 | H | -2.6198 | -2.2575 | -3.9295 |
| 105 | H | 0.5890  | -4.9570 | -4.8935 |
| 106 | H | -1.1475 | -3.3632 | -5.6279 |

107

I

-1.0399

-5.1760

0.0195

large\_basis\_A-2-Cl\_NiITMe2\_eta2\_PhCl\_bb  
 Energy (POTENTIAL) = -1628.52099082 Eh

|    | Atom | X       | Y       | Z       |
|----|------|---------|---------|---------|
| 1  | C    | -1.6510 | 0.8726  | 0.0118  |
| 2  | C    | -0.3965 | 0.6479  | -0.4731 |
| 3  | C    | -0.3227 | 2.5917  | 0.7384  |
| 4  | N    | -1.5771 | 2.0594  | 0.7494  |
| 5  | N    | 0.3931  | 1.7077  | -0.0145 |
| 6  | C    | -2.7079 | 2.6666  | 1.4327  |
| 7  | H    | -2.3257 | 3.4583  | 2.0766  |
| 8  | H    | -3.4207 | 3.0839  | 0.7127  |
| 9  | H    | -3.2186 | 1.9255  | 2.0537  |
| 10 | C    | 1.8107  | 1.8532  | -0.3048 |
| 11 | H    | 1.9725  | 2.0534  | -1.3699 |
| 12 | H    | 2.1924  | 2.6881  | 0.2830  |
| 13 | H    | 2.3528  | 0.9442  | -0.0267 |
| 14 | C    | 0.1538  | -0.4507 | -1.3184 |
| 15 | H    | 0.6051  | -0.0636 | -2.2411 |
| 16 | H    | 0.9304  | -1.0209 | -0.7917 |
| 17 | H    | -0.6391 | -1.1494 | -1.5997 |
| 18 | C    | -2.9152 | 0.0935  | -0.1274 |
| 19 | H    | -2.7577 | -0.7749 | -0.7731 |
| 20 | H    | -3.2760 | -0.2712 | 0.8432  |
| 21 | H    | -3.7184 | 0.6986  | -0.5673 |
| 22 | C    | 0.3780  | 5.5603  | 0.1839  |
| 23 | N    | 1.4894  | 6.0227  | -0.4578 |
| 24 | N    | -0.6409 | 6.2319  | -0.4228 |
| 25 | C    | 1.1738  | 6.9523  | -1.4534 |
| 26 | C    | 2.8431  | 5.5922  | -0.1405 |
| 27 | C    | -0.1840 | 7.0862  | -1.4305 |
| 28 | C    | -2.0411 | 6.0588  | -0.0708 |
| 29 | C    | 2.2135  | 7.6119  | -2.2950 |
| 30 | H    | 3.2565  | 4.9804  | -0.9496 |
| 31 | H    | 3.4898  | 6.4606  | 0.0156  |
| 32 | C    | -1.1072 | 7.9348  | -2.2380 |
| 33 | H    | -2.5792 | 5.5226  | -0.8604 |
| 34 | H    | -2.0861 | 5.4818  | 0.8531  |
| 35 | H    | -2.5174 | 7.0309  | 0.0875  |
| 36 | H    | 1.7451  | 8.2685  | -3.0336 |
| 37 | H    | 2.8973  | 8.2227  | -1.6912 |
| 38 | H    | 2.8242  | 6.8781  | -2.8365 |
| 39 | H    | -1.8730 | 7.3321  | -2.7428 |
| 40 | H    | -1.6311 | 8.6716  | -1.6150 |
| 41 | H    | -0.5516 | 8.4818  | -3.0048 |
| 42 | Ni   | 0.3182  | 4.2004  | 1.5961  |
| 43 | C    | 0.7998  | 3.6363  | 3.3201  |
| 44 | C    | 0.8111  | 5.0925  | 3.4147  |
| 45 | C    | 2.0723  | 2.9587  | 3.4256  |
| 46 | C    | 2.0472  | 5.7688  | 3.6822  |
| 47 | H    | -0.1115 | 5.6157  | 3.6652  |
| 48 | C    | 3.2418  | 3.6648  | 3.5757  |
| 49 | H    | 2.0863  | 1.8735  | 3.3587  |
| 50 | C    | 3.2399  | 5.0867  | 3.7292  |
| 51 | H    | 2.0225  | 6.8423  | 3.8662  |

|    |    |         |        |        |
|----|----|---------|--------|--------|
| 52 | H  | 4.1892  | 3.1286 | 3.5909 |
| 53 | H  | 4.1755  | 5.6110 | 3.9074 |
| 54 | Cl | -0.5794 | 2.7040 | 4.4153 |
| 55 | H  | 2.8095  | 5.0071 | 0.7795 |

large\_basis\_D-4-Cl\_trans-NiClPhIPhen2\_bb  
Energy (POTENTIAL) = -2238.44772474 Eh

|    | Atom | X       | Y       | Z       |
|----|------|---------|---------|---------|
| 1  | C    | -0.5475 | 1.4817  | -0.1426 |
| 2  | C    | 0.5598  | 2.2536  | -0.1924 |
| 3  | C    | 1.2528  | 0.0753  | -0.1080 |
| 4  | N    | -0.1112 | 0.1558  | -0.0862 |
| 5  | N    | 1.6487  | 1.3843  | -0.1649 |
| 6  | Ni   | 2.4233  | -1.4595 | -0.2974 |
| 7  | C    | 3.6113  | -2.9096 | -0.7915 |
| 8  | N    | 4.9698  | -3.0202 | -0.6914 |
| 9  | N    | 3.2558  | -4.0038 | -1.5331 |
| 10 | C    | 5.4433  | -4.1472 | -1.3680 |
| 11 | C    | 4.3649  | -4.7652 | -1.8965 |
| 12 | H    | 6.4898  | -4.4080 | -1.3717 |
| 13 | H    | 4.2718  | -5.6802 | -2.4598 |
| 14 | H    | -1.5954 | 1.7345  | -0.1063 |
| 15 | H    | 0.6835  | 3.3248  | -0.2079 |
| 16 | C    | 1.9293  | -4.2923 | -1.9741 |
| 17 | C    | 0.8605  | -4.1990 | -1.0805 |
| 18 | C    | 1.7196  | -4.6454 | -3.3104 |
| 19 | C    | -0.4308 | -4.4608 | -1.5394 |
| 20 | C    | 0.4247  | -4.9125 | -3.7551 |
| 21 | C    | -0.6535 | -4.8178 | -2.8716 |
| 22 | H    | -1.2622 | -4.3842 | -0.8493 |
| 23 | H    | 0.2605  | -5.1787 | -4.7956 |
| 24 | C    | 5.8732  | -2.1427 | -0.0056 |
| 25 | C    | 6.9568  | -1.6150 | -0.7144 |
| 26 | C    | 5.7319  | -1.9124 | 1.3639  |
| 27 | C    | 7.9272  | -0.8758 | -0.0359 |
| 28 | C    | 6.7061  | -1.1683 | 2.0322  |
| 29 | C    | 7.8112  | -0.6626 | 1.3405  |
| 30 | H    | 8.7727  | -0.4697 | -0.5839 |
| 31 | H    | 6.6038  | -0.9940 | 3.0997  |
| 32 | C    | -1.0527 | -0.9238 | -0.0165 |
| 33 | C    | -2.0430 | -1.0109 | -0.9999 |
| 34 | C    | -1.0443 | -1.7979 | 1.0716  |
| 35 | C    | -3.0528 | -1.9665 | -0.8748 |
| 36 | C    | -2.0559 | -2.7537 | 1.1843  |
| 37 | C    | -3.0684 | -2.8312 | 0.2231  |
| 38 | H    | -3.8260 | -2.0322 | -1.6352 |
| 39 | H    | -2.0559 | -3.4314 | 2.0336  |
| 40 | C    | 3.0018  | 1.8208  | -0.2931 |
| 41 | C    | 3.9948  | 1.2702  | 0.5192  |
| 42 | C    | 3.3146  | 2.7829  | -1.2576 |
| 43 | C    | 5.3149  | 1.6911  | 0.3547  |
| 44 | C    | 4.6366  | 3.2025  | -1.4062 |
| 45 | C    | 5.6400  | 2.6550  | -0.6028 |
| 46 | H    | 6.0881  | 1.2619  | 0.9800  |
| 47 | H    | 4.8812  | 3.9443  | -2.1614 |
| 48 | C    | 2.5231  | -0.9669 | -2.1409 |
| 49 | C    | 1.4427  | -1.1863 | -3.0157 |
| 50 | C    | 3.6786  | -0.3727 | -2.6820 |
| 51 | C    | 1.5118  | -0.8350 | -4.3685 |

|    |    |         |         |         |
|----|----|---------|---------|---------|
| 52 | H  | 0.5326  | -1.6437 | -2.6348 |
| 53 | C  | 3.7528  | -0.0117 | -4.0320 |
| 54 | H  | 4.5338  | -0.1844 | -2.0369 |
| 55 | C  | 2.6690  | -0.2437 | -4.8847 |
| 56 | H  | 0.6601  | -1.0252 | -5.0197 |
| 57 | H  | 4.6593  | 0.4520  | -4.4178 |
| 58 | H  | 2.7250  | 0.0333  | -5.9351 |
| 59 | Cl | 2.3032  | -2.0790 | 1.9853  |
| 60 | H  | 6.6716  | 2.9747  | -0.7231 |
| 61 | H  | 8.5720  | -0.0952 | 1.8693  |
| 62 | H  | -1.6634 | -5.0184 | -3.2186 |
| 63 | H  | -3.8592 | -3.5697 | 0.3232  |
| 64 | H  | -0.2557 | -1.7213 | 1.8106  |
| 65 | H  | -2.0227 | -0.3289 | -1.8447 |
| 66 | H  | 2.5352  | 3.1726  | -1.9046 |
| 67 | H  | 3.7342  | 0.5167  | 1.2556  |
| 68 | H  | 4.8713  | -2.3145 | 1.8851  |
| 69 | H  | 1.0429  | -3.9135 | -0.0492 |
| 70 | H  | 7.0371  | -1.7936 | -1.7825 |
| 71 | H  | 2.5578  | -4.6786 | -3.9994 |



large\_basis\_TS-D-2-3-Cl\_NiIPhen\_oats\_PhCl\_bb

Energy (POTENTIAL) = -2238.36769712 Eh

|    | Atom | X       | Y       | Z       |
|----|------|---------|---------|---------|
| 1  | C    | -0.8550 | -0.7360 | 0.1365  |
| 2  | C    | -0.0119 | -0.4479 | -0.8806 |
| 3  | C    | -0.8054 | -2.5689 | -1.2350 |
| 4  | N    | -1.3410 | -2.0260 | -0.0908 |
| 5  | N    | 0.0028  | -1.5702 | -1.7072 |
| 6  | Ni   | -1.0024 | -4.3190 | -1.9565 |
| 7  | C    | 0.7155  | -5.2482 | -1.6297 |
| 8  | N    | 1.4577  | -5.4146 | -0.4861 |
| 9  | N    | 1.3987  | -6.0167 | -2.5425 |
| 10 | C    | 2.5392  | -6.2720 | -0.6783 |
| 11 | C    | 2.5056  | -6.6464 | -1.9766 |
| 12 | H    | 3.2280  | -6.5079 | 0.1179  |
| 13 | H    | 3.1698  | -7.2668 | -2.5574 |
| 14 | H    | -1.1319 | -0.1613 | 1.0055  |
| 15 | H    | 0.5671  | 0.4350  | -1.1029 |
| 16 | C    | 1.0848  | -6.1461 | -3.9311 |
| 17 | C    | 1.0978  | -7.4130 | -4.5234 |
| 18 | C    | 0.8319  | -5.0050 | -4.6917 |
| 19 | C    | 0.8722  | -7.5298 | -5.8953 |
| 20 | C    | 0.5988  | -5.1330 | -6.0606 |
| 21 | C    | 0.6259  | -6.3908 | -6.6677 |
| 22 | H    | 0.8816  | -8.5129 | -6.3576 |
| 23 | H    | 0.3982  | -4.2425 | -6.6485 |
| 24 | C    | 1.1894  | -4.8272 | 0.7929  |
| 25 | C    | 1.3131  | -3.4490 | 0.9710  |
| 26 | C    | 0.8465  | -5.6598 | 1.8617  |
| 27 | C    | 1.0619  | -2.8968 | 2.2278  |
| 28 | C    | 0.6064  | -5.1008 | 3.1178  |
| 29 | C    | 0.7071  | -3.7187 | 3.3004  |
| 30 | H    | 1.1425  | -1.8225 | 2.3642  |
| 31 | H    | 0.3301  | -5.7435 | 3.9486  |
| 32 | C    | -2.2664 | -2.6678 | 0.7892  |
| 33 | C    | -3.2621 | -1.9061 | 1.4091  |
| 34 | C    | -2.1736 | -4.0376 | 1.0422  |
| 35 | C    | -4.1610 | -2.5205 | 2.2813  |
| 36 | C    | -3.0818 | -4.6457 | 1.9072  |
| 37 | C    | -4.0772 | -3.8921 | 2.5332  |
| 38 | H    | -4.9377 | -1.9244 | 2.7524  |
| 39 | H    | -3.0000 | -5.7125 | 2.0975  |
| 40 | C    | 0.7268  | -1.6307 | -2.9426 |
| 41 | C    | 2.1092  | -1.8264 | -2.9262 |
| 42 | C    | 0.0388  | -1.4672 | -4.1471 |
| 43 | C    | 2.8104  | -1.8596 | -4.1336 |
| 44 | C    | 0.7471  | -1.4985 | -5.3496 |
| 45 | C    | 2.1316  | -1.6937 | -5.3440 |
| 46 | H    | 3.8849  | -2.0188 | -4.1272 |
| 47 | H    | 0.2161  | -1.3721 | -6.2887 |
| 48 | C    | -2.6588 | -4.3704 | -2.7901 |
| 49 | C    | -2.7295 | -3.9887 | -4.1709 |
| 50 | C    | -2.4665 | -5.7673 | -2.4910 |
| 51 | C    | -2.6467 | -4.9352 | -5.1679 |

|    |    |         |         |         |
|----|----|---------|---------|---------|
| 52 | H  | -2.8553 | -2.9383 | -4.4162 |
| 53 | C  | -2.4493 | -6.7228 | -3.5520 |
| 54 | H  | -2.6522 | -6.1341 | -1.4821 |
| 55 | C  | -2.5256 | -6.3198 | -4.8668 |
| 56 | H  | -2.6593 | -4.6167 | -6.2086 |
| 57 | H  | -2.3975 | -7.7818 | -3.3038 |
| 58 | H  | -2.4853 | -7.0463 | -5.6735 |
| 59 | Cl | -4.3570 | -3.4523 | -1.8306 |
| 60 | H  | -4.7823 | -4.3683 | 3.2089  |
| 61 | H  | -1.3950 | -4.6190 | 0.5673  |
| 62 | H  | -3.3576 | -0.8478 | 1.1878  |
| 63 | H  | -1.0357 | -1.3211 | -4.1321 |
| 64 | H  | 2.6215  | -1.9611 | -1.9782 |
| 65 | H  | 2.6794  | -1.7222 | -6.2817 |
| 66 | H  | 0.4490  | -6.4850 | -7.7356 |
| 67 | H  | 0.8167  | -4.0376 | -4.2087 |
| 68 | H  | 1.2776  | -8.2937 | -3.9141 |
| 69 | H  | 0.5087  | -3.2835 | 4.2757  |
| 70 | H  | 0.7561  | -6.7297 | 1.6982  |
| 71 | H  | 1.5927  | -2.8210 | 0.1330  |

large\_basis\_ITMe\_ITMe\_bb

Energy (POTENTIAL) = -383.575486154 Eh

|    | Atom | X       | Y       | Z       |
|----|------|---------|---------|---------|
| 1  | C    | -0.1703 | 8.1023  | 0.2226  |
| 2  | N    | 0.1801  | 8.9000  | -0.8318 |
| 3  | N    | -0.5524 | 9.0269  | 1.1554  |
| 4  | C    | 0.0238  | 10.2667 | -0.5724 |
| 5  | C    | 0.6652  | 8.3804  | -2.0993 |
| 6  | C    | -0.4461 | 10.3483 | 0.7058  |
| 7  | C    | -1.0219 | 8.6730  | 2.4847  |
| 8  | C    | 0.3433  | 11.3249 | -1.5749 |
| 9  | H    | 0.7023  | 7.2924  | -2.0290 |
| 10 | H    | -0.0019 | 8.6641  | -2.9212 |
| 11 | H    | 1.6695  | 8.7598  | -2.3190 |
| 12 | C    | -0.8148 | 11.5246 | 1.5466  |
| 13 | H    | -1.0249 | 7.5850  | 2.5655  |
| 14 | H    | -0.3637 | 9.0884  | 3.2563  |
| 15 | H    | -2.0371 | 9.0490  | 2.6537  |
| 16 | H    | 0.1331  | 12.3174 | -1.1656 |
| 17 | H    | 1.4011  | 11.3018 | -1.8689 |
| 18 | H    | -0.2491 | 11.2087 | -2.4920 |
| 19 | H    | -1.8737 | 11.5016 | 1.8365  |
| 20 | H    | -0.2266 | 11.5653 | 2.4729  |
| 21 | H    | -0.6398 | 12.4564 | 1.0005  |

large\_basis\_NiIMes2\_distort\_NiIMes2\_eta2\_PhBr\_bb\_NiL2frag  
Energy (POTENTIAL) = -2018.31733565 Eh

|    | Atom | X       | Y       | Z       |
|----|------|---------|---------|---------|
| 1  | C    | 0.4076  | 0.5604  | 0.0000  |
| 2  | C    | 1.4062  | 0.8473  | -0.8561 |
| 3  | C    | 1.1334  | -1.4530 | -0.8813 |
| 4  | N    | 0.2338  | -0.8234 | -0.0308 |
| 5  | N    | 1.8405  | -0.3697 | -1.3792 |
| 6  | Ni   | 1.3266  | -3.3446 | -1.4900 |
| 7  | C    | 3.0322  | -4.4894 | -1.3712 |
| 8  | N    | 3.7701  | -4.7919 | -0.2420 |
| 9  | N    | 3.4684  | -5.4701 | -2.2513 |
| 10 | C    | 4.5957  | -5.9025 | -0.4151 |
| 11 | C    | 4.4102  | -6.3240 | -1.6825 |
| 12 | H    | 5.2368  | -6.2626 | 0.3745  |
| 13 | H    | 4.8502  | -7.1363 | -2.2399 |
| 14 | H    | -0.2039 | 1.1934  | 0.6235  |
| 15 | H    | 1.8518  | 1.7846  | -1.1496 |
| 16 | C    | 3.1621  | -5.5927 | -3.6481 |
| 17 | C    | 2.5087  | -6.7425 | -4.1173 |
| 18 | C    | 3.6449  | -4.6070 | -4.5279 |
| 19 | C    | 2.2851  | -6.8543 | -5.4973 |
| 20 | C    | 3.3821  | -4.7537 | -5.8914 |
| 21 | C    | 2.6958  | -5.8669 | -6.3962 |
| 22 | H    | 1.7641  | -7.7333 | -5.8708 |
| 23 | H    | 3.7410  | -3.9916 | -6.5801 |
| 24 | C    | 3.9496  | -3.9870 | 0.9355  |
| 25 | C    | 4.8993  | -2.9529 | 0.8798  |
| 26 | C    | 3.3358  | -4.3670 | 2.1358  |
| 27 | C    | 5.1519  | -2.2294 | 2.0491  |
| 28 | C    | 3.6345  | -3.6275 | 3.2865  |
| 29 | C    | 4.5199  | -2.5450 | 3.2591  |
| 30 | H    | 5.8761  | -1.4182 | 2.0205  |
| 31 | H    | 3.1571  | -3.9025 | 4.2243  |
| 32 | C    | -0.8775 | -1.3726 | 0.7021  |
| 33 | C    | -2.1801 | -1.0174 | 0.3083  |
| 34 | C    | -0.6433 | -2.1159 | 1.8664  |
| 35 | C    | -3.2505 | -1.4644 | 1.0934  |
| 36 | C    | -1.7402 | -2.5301 | 2.6244  |
| 37 | C    | -3.0527 | -2.2224 | 2.2514  |
| 38 | H    | -4.2635 | -1.2075 | 0.7903  |
| 39 | H    | -1.5634 | -3.1129 | 3.5262  |
| 40 | C    | 2.8446  | -0.3566 | -2.4069 |
| 41 | C    | 4.1574  | 0.0039  | -2.0648 |
| 42 | C    | 2.4458  | -0.5069 | -3.7477 |
| 43 | C    | 5.0976  | 0.1233  | -3.0972 |
| 44 | C    | 3.4131  | -0.3558 | -4.7435 |
| 45 | C    | 4.7466  | -0.0554 | -4.4382 |
| 46 | H    | 6.1233  | 0.3822  | -2.8432 |
| 47 | H    | 3.1179  | -0.4765 | -5.7836 |
| 48 | C    | 4.4774  | -3.4609 | -4.0161 |
| 49 | H    | 3.8907  | -2.7930 | -3.3821 |
| 50 | H    | 5.3137  | -3.8286 | -3.4093 |
| 51 | H    | 4.8855  | -2.8780 | -4.8446 |

|    |   |         |         |         |
|----|---|---------|---------|---------|
| 52 | C | 2.0561  | -7.8532 | -3.1981 |
| 53 | H | 2.8113  | -8.6483 | -3.1402 |
| 54 | H | 1.8763  | -7.5047 | -2.1776 |
| 55 | H | 1.1329  | -8.3084 | -3.5719 |
| 56 | C | 2.3974  | -5.9793 | -7.8720 |
| 57 | H | 3.2591  | -5.6782 | -8.4796 |
| 58 | H | 2.1234  | -7.0022 | -8.1514 |
| 59 | H | 1.5612  | -5.3248 | -8.1526 |
| 60 | C | 2.3950  | -5.5436 | 2.1808  |
| 61 | H | 2.9268  | -6.4844 | 1.9881  |
| 62 | H | 1.9138  | -5.6246 | 3.1603  |
| 63 | H | 1.6132  | -5.4554 | 1.4193  |
| 64 | C | 5.6716  | -2.6954 | -0.3894 |
| 65 | H | 6.2113  | -3.5980 | -0.7026 |
| 66 | H | 5.0092  | -2.4178 | -1.2135 |
| 67 | H | 6.4042  | -1.8969 | -0.2493 |
| 68 | C | 4.7837  | -1.7292 | 4.5019  |
| 69 | H | 4.0887  | -0.8809 | 4.5689  |
| 70 | H | 4.6543  | -2.3266 | 5.4111  |
| 71 | H | 5.7990  | -1.3171 | 4.5042  |
| 72 | C | 4.5375  | 0.3293  | -0.6411 |
| 73 | H | 4.1858  | 1.3313  | -0.3634 |
| 74 | H | 4.0985  | -0.3731 | 0.0722  |
| 75 | H | 5.6237  | 0.3200  | -0.5162 |
| 76 | C | 1.0082  | -0.7841 | -4.0922 |
| 77 | H | 0.3501  | 0.0072  | -3.7098 |
| 78 | H | 0.8689  | -0.8534 | -5.1753 |
| 79 | H | 0.6737  | -1.7204 | -3.6412 |
| 80 | C | 5.7791  | 0.0423  | -5.5346 |
| 81 | H | 6.6727  | 0.5818  | -5.2027 |
| 82 | H | 6.1000  | -0.9577 | -5.8585 |
| 83 | H | 5.3789  | 0.5526  | -6.4185 |
| 84 | C | -2.4484 | -0.1683 | -0.9132 |
| 85 | H | -1.7466 | -0.3887 | -1.7220 |
| 86 | H | -3.4632 | -0.3428 | -1.2854 |
| 87 | H | -2.3621 | 0.9019  | -0.6856 |
| 88 | C | 0.7589  | -2.4597 | 2.2688  |
| 89 | H | 1.3688  | -1.5619 | 2.4296  |
| 90 | H | 0.7747  | -3.0543 | 3.1858  |
| 91 | H | 1.2457  | -3.0303 | 1.4754  |
| 92 | C | -4.2223 | -2.7243 | 3.0640  |
| 93 | H | -5.1217 | -2.1229 | 2.8925  |
| 94 | H | -4.4666 | -3.7622 | 2.7994  |
| 95 | H | -4.0008 | -2.7099 | 4.1377  |

large\_basis\_C-2-Cl\_NiIXy2\_e2PhCl\_bb  
Energy (POTENTIAL) = -2552.99589044 Eh

|    | Atom | X       | Y       | Z       |
|----|------|---------|---------|---------|
| 1  | C    | 1.1287  | 1.4178  | -0.0033 |
| 2  | C    | 2.1291  | 1.7064  | -0.8564 |
| 3  | C    | 1.8799  | -0.5984 | -0.8642 |
| 4  | N    | 0.9695  | 0.0323  | -0.0222 |
| 5  | N    | 2.5781  | 0.4889  | -1.3664 |
| 6  | Ni   | 2.0810  | -2.5035 | -1.4183 |
| 7  | C    | 3.7587  | -3.6502 | -1.2862 |
| 8  | N    | 4.4968  | -3.9542 | -0.1559 |
| 9  | N    | 4.2045  | -4.6278 | -2.1679 |
| 10 | C    | 5.3312  | -5.0588 | -0.3313 |
| 11 | C    | 5.1513  | -5.4771 | -1.6000 |
| 12 | H    | 5.9727  | -5.4174 | 0.4587  |
| 13 | H    | 5.5984  | -6.2844 | -2.1591 |
| 14 | H    | 0.5090  | 2.0509  | 0.6118  |
| 15 | H    | 2.5682  | 2.6452  | -1.1549 |
| 16 | C    | 3.8988  | -4.7528 | -3.5642 |
| 17 | C    | 3.2472  | -5.9088 | -4.0272 |
| 18 | C    | 4.3729  | -3.7592 | -4.4395 |
| 19 | C    | 3.0160  | -6.0214 | -5.4060 |
| 20 | C    | 4.1047  | -3.9021 | -5.8048 |
| 21 | C    | 3.4261  | -5.0229 | -6.2871 |
| 22 | H    | 2.4983  | -6.9004 | -5.7819 |
| 23 | H    | 4.4525  | -3.1372 | -6.4945 |
| 24 | C    | 4.6699  | -3.1579 | 1.0284  |
| 25 | C    | 5.6166  | -2.1200 | 0.9785  |
| 26 | C    | 4.0437  | -3.5509 | 2.2195  |
| 27 | C    | 5.8651  | -1.4034 | 2.1549  |
| 28 | C    | 4.3399  | -2.8256 | 3.3811  |
| 29 | C    | 5.2278  | -1.7511 | 3.3474  |
| 30 | H    | 6.5834  | -0.5878 | 2.1375  |
| 31 | H    | 3.8604  | -3.1056 | 4.3154  |
| 32 | C    | -0.1307 | -0.5231 | 0.7221  |
| 33 | C    | -1.4398 | -0.1816 | 0.3309  |
| 34 | C    | 0.1252  | -1.2648 | 1.8832  |
| 35 | C    | -2.5019 | -0.6387 | 1.1224  |
| 36 | C    | -0.9622 | -1.6989 | 2.6487  |
| 37 | C    | -2.2685 | -1.3920 | 2.2724  |
| 38 | H    | -3.5201 | -0.3975 | 0.8273  |
| 39 | H    | -0.7750 | -2.2821 | 3.5469  |
| 40 | C    | 3.6045  | 0.5096  | -2.3719 |
| 41 | C    | 4.9082  | 0.8698  | -1.9895 |
| 42 | C    | 3.2319  | 0.3637  | -3.7204 |
| 43 | C    | 5.8728  | 1.0057  | -2.9976 |
| 44 | C    | 4.2198  | 0.5329  | -4.6966 |
| 45 | C    | 5.5326  | 0.8416  | -4.3394 |
| 46 | H    | 6.8916  | 1.2658  | -2.7215 |
| 47 | H    | 3.9519  | 0.4206  | -5.7441 |
| 48 | C    | 5.1964  | -2.6090 | -3.9239 |
| 49 | H    | 4.6017  | -1.9428 | -3.2951 |
| 50 | H    | 6.0294  | -2.9716 | -3.3098 |
| 51 | H    | 5.6075  | -2.0251 | -4.7497 |

|    |    |         |         |         |
|----|----|---------|---------|---------|
| 52 | C  | 2.8069  | -7.0211 | -3.1041 |
| 53 | H  | 3.5648  | -7.8143 | -3.0564 |
| 54 | H  | 2.6373  | -6.6750 | -2.0812 |
| 55 | H  | 1.8810  | -7.4776 | -3.4694 |
| 56 | C  | 3.0788  | -4.7083 | 2.2378  |
| 57 | H  | 3.5633  | -5.6400 | 1.9207  |
| 58 | H  | 2.6713  | -4.8628 | 3.2416  |
| 59 | H  | 2.2440  | -4.5327 | 1.5503  |
| 60 | C  | 6.3853  | -1.8500 | -0.2901 |
| 61 | H  | 6.9343  | -2.7456 | -0.6068 |
| 62 | H  | 5.7194  | -1.5764 | -1.1129 |
| 63 | H  | 7.1095  | -1.0445 | -0.1467 |
| 64 | C  | 5.2491  | 1.1774  | -0.5520 |
| 65 | H  | 4.8799  | 2.1714  | -0.2688 |
| 66 | H  | 4.8001  | 0.4604  | 0.1401  |
| 67 | H  | 6.3320  | 1.1769  | -0.4010 |
| 68 | C  | 1.8066  | 0.0613  | -4.0918 |
| 69 | H  | 1.1220  | 0.8234  | -3.6979 |
| 70 | H  | 1.6838  | 0.0163  | -5.1783 |
| 71 | H  | 1.4926  | -0.8958 | -3.6693 |
| 72 | C  | -1.7197 | 0.6466  | -0.9012 |
| 73 | H  | -1.0345 | 0.3993  | -1.7163 |
| 74 | H  | -2.7427 | 0.4757  | -1.2518 |
| 75 | H  | -1.6166 | 1.7199  | -0.6981 |
| 76 | C  | 1.5352  | -1.5779 | 2.2832  |
| 77 | H  | 2.1148  | -0.6660 | 2.4747  |
| 78 | H  | 1.5614  | -2.1950 | 3.1844  |
| 79 | H  | 2.0485  | -2.1099 | 1.4800  |
| 80 | C  | 0.1967  | -3.1906 | -1.5272 |
| 81 | C  | -0.9348 | -2.4339 | -1.9826 |
| 82 | C  | 1.0274  | -3.8915 | -2.4811 |
| 83 | C  | -1.0892 | -2.1597 | -3.3188 |
| 84 | H  | -1.6510 | -2.0795 | -1.2529 |
| 85 | C  | 0.8049  | -3.5781 | -3.8675 |
| 86 | H  | 1.4235  | -4.8707 | -2.2402 |
| 87 | C  | -0.1891 | -2.7186 | -4.2736 |
| 88 | H  | -1.9141 | -1.5332 | -3.6501 |
| 89 | H  | 1.4098  | -4.0821 | -4.6123 |
| 90 | H  | -0.3258 | -2.5053 | -5.3313 |
| 91 | Cl | -0.1038 | -4.0903 | 0.0544  |
| 92 | H  | 5.4384  | -1.1940 | 4.2568  |
| 93 | H  | 3.2275  | -5.1220 | -7.3511 |
| 94 | H  | 6.2905  | 0.9615  | -5.1094 |
| 95 | H  | -3.1049 | -1.7378 | 2.8746  |

large\_basis\_A-3-I\_cis-NiIPhITMe2  
 Energy (POTENTIAL) = -1179.75532412 Eh

|    | Atom | X       | Y       | Z       |
|----|------|---------|---------|---------|
| 1  | C    | 0.2456  | 0.4304  | -0.8432 |
| 2  | C    | 1.2277  | -0.0589 | -0.0313 |
| 3  | C    | -0.0922 | -1.8175 | -0.6429 |
| 4  | N    | -0.5445 | -0.6652 | -1.2032 |
| 5  | N    | 0.9939  | -1.4334 | 0.0746  |
| 6  | Ni   | -0.7879 | -3.6368 | -0.9688 |
| 7  | C    | 0.7659  | -4.0804 | -1.9375 |
| 8  | N    | 1.7666  | -4.9121 | -1.5522 |
| 9  | N    | 1.1451  | -3.6295 | -3.1597 |
| 10 | C    | 2.7706  | -4.9858 | -2.5243 |
| 11 | C    | 2.3776  | -4.1708 | -3.5443 |
| 12 | C    | -1.8618 | -5.5659 | -2.8691 |
| 13 | C    | -2.4003 | -6.7773 | -3.3204 |
| 14 | C    | -1.4751 | -5.3654 | -1.5276 |
| 15 | C    | -2.5473 | -7.8507 | -2.4375 |
| 16 | H    | -2.6966 | -6.8856 | -4.3627 |
| 17 | C    | -1.6370 | -6.4681 | -0.6635 |
| 18 | C    | -2.1577 | -7.6900 | -1.1036 |
| 19 | H    | -2.9568 | -8.7974 | -2.7826 |
| 20 | H    | -1.3657 | -6.3662 | 0.3857  |
| 21 | H    | -2.2678 | -8.5161 | -0.4028 |
| 22 | C    | -1.7486 | -0.5609 | -2.0151 |
| 23 | H    | -1.5082 | -0.1670 | -3.0074 |
| 24 | H    | -2.1887 | -1.5535 | -2.1090 |
| 25 | H    | -2.4735 | 0.0997  | -1.5304 |
| 26 | C    | -0.0489 | 1.8133  | -1.3160 |
| 27 | H    | -0.0371 | 1.8773  | -2.4117 |
| 28 | H    | -1.0372 | 2.1526  | -0.9801 |
| 29 | H    | 0.6954  | 2.5153  | -0.9306 |
| 30 | C    | 2.3538  | 0.6209  | 0.6705  |
| 31 | H    | 3.3266  | 0.2072  | 0.3756  |
| 32 | H    | 2.3576  | 1.6887  | 0.4355  |
| 33 | H    | 2.2714  | 0.5195  | 1.7602  |
| 34 | C    | 1.8163  | -2.3526 | 0.8472  |
| 35 | H    | 1.2399  | -3.2612 | 1.0151  |
| 36 | H    | 2.7384  | -2.5983 | 0.3097  |
| 37 | H    | 2.0698  | -1.9069 | 1.8121  |
| 38 | C    | 1.7744  | -5.6918 | -0.3226 |
| 39 | H    | 1.7547  | -6.7608 | -0.5535 |
| 40 | H    | 2.6693  | -5.4647 | 0.2642  |
| 41 | H    | 0.8866  | -5.4377 | 0.2541  |
| 42 | C    | 0.3903  | -2.6719 | -3.9546 |
| 43 | H    | 0.8669  | -1.6866 | -3.9280 |
| 44 | H    | 0.3274  | -3.0144 | -4.9904 |
| 45 | H    | -0.6142 | -2.5982 | -3.5418 |
| 46 | C    | 3.9814  | -5.8372 | -2.3497 |
| 47 | H    | 4.5619  | -5.5402 | -1.4667 |
| 48 | H    | 3.7167  | -6.8948 | -2.2254 |
| 49 | H    | 4.6331  | -5.7559 | -3.2237 |
| 50 | C    | 3.0258  | -3.8366 | -4.8446 |
| 51 | H    | 2.4084  | -4.1466 | -5.6974 |
| 52 | H    | 3.2044  | -2.7583 | -4.9437 |
| 53 | H    | 3.9900  | -4.3452 | -4.9280 |
| 54 | H    | -1.7355 | -4.7554 | -3.5862 |
| 55 | I    | -2.8426 | -3.1804 | 0.7004  |



large\_basis\_A-4-I\_trans-NiIPhITMe2

Energy (POTENTIAL) = -1179.76388985 Eh

|    | Atom | X       | Y       | Z       |
|----|------|---------|---------|---------|
| 1  | C    | -0.6806 | 2.1774  | 1.0101  |
| 2  | C    | 0.2331  | 2.1254  | -0.0023 |
| 3  | C    | -0.0988 | 4.3220  | 0.5053  |
| 4  | N    | -0.8646 | 3.5330  | 1.2993  |
| 5  | N    | 0.5727  | 3.4512  | -0.2890 |
| 6  | C    | -1.7755 | 4.0375  | 2.3152  |
| 7  | H    | -1.6190 | 5.1128  | 2.4085  |
| 8  | H    | -2.8144 | 3.8411  | 2.0317  |
| 9  | H    | -1.5695 | 3.5629  | 3.2788  |
| 10 | C    | 1.5217  | 3.8512  | -1.3166 |
| 11 | H    | 1.1272  | 3.6290  | -2.3130 |
| 12 | H    | 1.6897  | 4.9247  | -1.2239 |
| 13 | H    | 2.4717  | 3.3274  | -1.1776 |
| 14 | C    | 0.8411  | 0.9723  | -0.7258 |
| 15 | H    | 0.6555  | 1.0290  | -1.8060 |
| 16 | H    | 1.9284  | 0.9329  | -0.5811 |
| 17 | H    | 0.4212  | 0.0307  | -0.3617 |
| 18 | C    | -1.3992 | 1.1009  | 1.7498  |
| 19 | H    | -1.1332 | 0.1198  | 1.3471  |
| 20 | H    | -1.1463 | 1.1057  | 2.8179  |
| 21 | H    | -2.4880 | 1.2140  | 1.6710  |
| 22 | C    | -0.1357 | 8.1723  | 0.2576  |
| 23 | N    | 0.6203  | 8.9527  | -0.5543 |
| 24 | N    | -0.9976 | 9.0368  | 0.8493  |
| 25 | C    | 0.2400  | 10.2959 | -0.4788 |
| 26 | C    | 1.6886  | 8.4510  | -1.4052 |
| 27 | C    | -0.7901 | 10.3495 | 0.4148  |
| 28 | C    | -2.0101 | 8.6449  | 1.8174  |
| 29 | C    | 0.9169  | 11.3618 | -1.2717 |
| 30 | H    | 1.8472  | 7.3979  | -1.1698 |
| 31 | H    | 1.4194  | 8.5529  | -2.4613 |
| 32 | H    | 2.6143  | 9.0014  | -1.2141 |
| 33 | C    | -1.5980 | 11.4943 | 0.9239  |
| 34 | H    | -3.0133 | 8.8260  | 1.4196  |
| 35 | H    | -1.8882 | 7.5812  | 2.0236  |
| 36 | H    | -1.8824 | 9.2059  | 2.7478  |
| 37 | H    | 0.4319  | 12.3272 | -1.1033 |
| 38 | H    | 1.9743  | 11.4638 | -0.9955 |
| 39 | H    | 0.8789  | 11.1494 | -2.3477 |
| 40 | H    | -2.6683 | 11.3541 | 0.7260  |
| 41 | H    | -1.4786 | 11.6230 | 2.0074  |
| 42 | H    | -1.2860 | 12.4242 | 0.4408  |
| 43 | Ni   | -0.0646 | 6.2503  | 0.4388  |
| 44 | I    | 1.8516  | 6.3834  | 2.3922  |
| 45 | C    | -1.3913 | 6.1462  | -0.9176 |
| 46 | C    | -1.0489 | 6.1474  | -2.2837 |
| 47 | C    | -2.7613 | 6.0600  | -0.6026 |
| 48 | C    | -2.0225 | 6.0613  | -3.2858 |
| 49 | H    | -0.0032 | 6.2182  | -2.5749 |
| 50 | C    | -3.7410 | 5.9774  | -1.5989 |
| 51 | H    | -3.0731 | 6.0547  | 0.4397  |
| 52 | C    | -3.3766 | 5.9760  | -2.9487 |
| 53 | H    | -1.7220 | 6.0627  | -4.3323 |
| 54 | H    | -4.7914 | 5.9129  | -1.3195 |
| 55 | H    | -4.1354 | 5.9106  | -3.7249 |

## REFERENCES

1. M. J. Frisch, G. W. Trucks, H. B. Schlegel, G. E. Scuseria, M. A. Robb, J. R. Cheeseman, G. Scalmani, V. Barone, B. Mennucci, G. A. Petersson, H. Nakatsuji, M. Caricato, X. Li, H. P. Hratchian, A. F. Izmaylov, J. Bloino, J. Zheng, L. Sonnenberg, M. Hada, M. Ehara, K. Toyota, R. Fukuda, J. Hasegawa, M. Ishida, T. Nakajima, Y. Honda, O. Kitao, T. Nakai, T. Vreven, J. A. Montgomery, J. E. Peralta, F. Ogliaro, M. Bearpark, J. J. Heyd, E. Brothers, K. N. Kudin, V. N. Staroverov, R. Kobayashi, J. Normand, K. Raghavachari, A. Rendell, J. C. Burant, S. S. Iyengar, J. Tomasi, M. Cossi, N. Rega, J. M. Millam, M. Klene, J. E. Knox, J. B. Cross, V. Bakken, C. Adamo, J. Jaramillo, R. Gomperts, R. E. Stratmann, O. Yazyev, A. J. Austin, C. Cammi, C. Pomelli, J. W. Ochterski, R. L. Martin, K. Morokuma, V. G. Zakrzewski, G. A. Voth, P. Salvador, J. J. Dannenberg, S. Dapprich, A. D. Daniels, O. Farkas, J. B. Foresman, J. V. Ortiz, J. Cioslowski and D. J. Fox, *Journal*, 2009.
2. A. D. Becke, *J. Chem. Phys.*, 1993, **98**, 5648-5652.
3. C. Lee, W. Yang and R. G. Parr, *Phys. Rev. B.: Condens. Mater.*, 1988, **37**, 785-789.
4. P. J. Stephens, F. J. Devlin, C. F. Chabalowski and M. J. Frisch, *J. Phys. Chem.*, 1994, **98**, 11623-11627.
5. S. Grimme, J. Antony, S. Ehrlich and H. Krieg, *J. Chem. Phys.*, 2010, **132**, 154104-154119.
6. I. Funes-Ardoiz, D. J. Nelson and F. Maseras, *Chem. Eur. J.*, 2017, **23**, 16728-16733.
7. N. Fey, B. M. Ridgway, J. Jover, C. L. McMullin and J. N. Harvey, *Dalton Trans.*, 2011, **40**, 11184-11191.
8. P. J. Hay and W. R. Wadt, *J. Chem. Phys.*, 1985, **82**, 299-310.
9. W. R. Wadt and P. J. Hay, *J. Chem. Phys.*, 1985, **82**, 284-298.
10. P. J. Hay and W. R. Wadt, *J. Chem. Phys.*, 1985, **82**, 270-283.
11. A. V. Marenich, C. J. Cramer and D. G. Truhlar, *J. Phys. Chem. B*, 2009, **113**, 6378-6396.
12. K. Yamaguchi, F. Jensen, A. Dorigo and K. N. Houk, *Chemical Physics Letters*, 1988, **149**, 537-542.
13. S. Yamanaka, T. Kawakami, H. Nagao and K. Yamaguchi, *Chemical Physics Letters*, 1994, **231**, 25-33.
14. M. H. Lim, S. E. Worthington, F. J. Dulles and C. J. Cramer, in *Chemical Applications of Density-Functional Theory*, American Chemical Society, 1996, vol. 629, ch. 27, pp. 402-422.
15. H. Isobe, Y. Takano, Y. Kitagawa, T. Kawakami, S. Yamanaka, K. Yamaguchi and K. N. Houk, *Molecular Physics*, 2002, **100**, 717-727.
16. H. Yu, Y. Fu, Q. Guo and Z. Lin, *Organometallics*, 2009, **28**, 4443-4451.
